# Supplementary material for: Performance-oriented multistage design for multi-principal element alloys with low cost yet high efficiency
Source: Royal Society of Chemistry journal article supplement (doi:10.1039/d1mh01912k), 2022-01-01
Supplement: d1mh01912k1.pdf [file d1mh01912k1.pdf]

## Supplementary Information

### Performance-oriented multistage design for multi-principal element alloys with low cost yet high efficiency

Jia Li, Baobin Xie, Li Li, Bin Liu, Yong Liu, Dmitry Shaysultanov, Qihong Fang, Nikita Stepanov, and Peter K. Liaw

#### Supplementary Text 1

##### Yield strength of MPEAs

The lattice-friction stress introduced by a single element in MPEAs can be expressed as

$$\sigma_f^i = AGc_i^{2/3}\delta_i^{4/3} \quad (1)$$

where  $A$  is a non-dimensional constant, which is equal to 0.04.  $G$  is the shear modulus of the material, which is obtained from the experiments.  $c_i$  is the atomic fraction of individual principal elements in MPEAs.  $\delta_i$  represents the mismatch parameter introduced by an element  $i$ , which is correlated with the elastic mismatch and the atomic-size mismatch,  $\delta_i = \xi(\delta G_i^2 + \beta^2 \delta r_i^2)^{1/2}$ , where  $\xi$  is equal to 2.5 for BCC MPEAs, and 1 for FCC MPEAs.  $\beta$  is dependent on the type of the dislocation, which is equal to 4 for BCC MPEAs, and 16 for FCC MPEAs, respectively. The elastic mismatch,  $\delta G_i$ , and the atomic-size mismatch,  $\delta r_i$ , introduced by the element,  $i$ , can be written as  $\delta r_i = (\delta r_{ijklm}^{ave} - \delta r_{jklm}^{ave}) / \delta c_i$ , and  $\delta G_i = (\delta G_{ijklm}^{ave} - \delta G_{jklm}^{ave}) / \delta c_i$ , where  $\delta r_{ijklm}^{ave}$  and  $\delta G_{ijklm}^{ave}$  denote the average atomic-size mismatch and elastic mismatch of the  $ijklm$  MPEA.  $\delta r_{jklm}^{ave}$  and  $\delta G_{jklm}^{ave}$  represent the average atomic-size mismatch and elastic mismatch of the  $jklm$  MPEA.  $\delta c_i$  represents the atomic-fraction difference of the element,  $i$ , between the  $ijklm$  and  $jklm$  MPEAs.

The various elements are assumed to be distributed uniformly in MPEAs. The average elastic mismatch and atomic-size mismatch of MPEAs can be expressed as

$$\delta r^{ave} = \sum_i^n \sum_j^n c_i c_j \delta r_{ij} = (c_1, c_2, L, c_n) \begin{pmatrix} \delta r_{11} & \delta r_{12} & L & \delta r_{1n} \\ \delta r_{21} & \delta r_{22} & L & \delta r_{2n} \\ M & L & O & M \\ \delta r_{n1} & \delta r_{n2} & L & \delta r_{nn} \end{pmatrix} \begin{pmatrix} c_1 \\ c_2 \\ M \\ c_n \end{pmatrix} \quad (2)$$

$$\delta G^{ave} = \sum_i^n \sum_j^n c_i c_j \delta G_{ij} = (c_1, c_2, L, c_n) \begin{pmatrix} \delta G_{11} & \delta G_{12} & L & \delta G_{1n} \\ \delta G_{21} & \delta G_{22} & L & \delta G_{2n} \\ M & L & O & M \\ \delta G_{n1} & \delta G_{n2} & L & \delta G_{nn} \end{pmatrix} \begin{pmatrix} c_1 \\ c_2 \\ M \\ c_n \end{pmatrix} \quad (3)$$

where  $\delta G_{ij}$  and  $\delta r_{ij}$  are the elastic mismatch and the atomic-size mismatch between the atoms,  $i$  and  $j$ , which can be expressed as  $\delta r_{ij} = 2(r_i - r_j) / (r_i + r_j)$ , and  $\delta G_{ij} = 2(G_i - G_j) / (G_i + G_j)$ , where  $r_i$  and  $r_j$  are the atomic radii,  $G_i$  and  $G_j$  are the shear moduli of pure metals  $i$  and  $j$ , respectively.

Finally, the lattice-friction stress in MPEAs can be expressed through the Vegard's law based on the lattice-friction stress introduced by each element,  $\sigma_f = \sum c_i \sigma_f^i$ . The grain-boundary strengthening depends on the size of the grain obtained by experimental observations, which can be described by the classical Hall-Petch strengthening relationship as follows,  $\sigma_{GB} = k / \sqrt{d}$ , where  $k$  represents the strengthening coefficient of the material, and  $d$  is the average grain size. Therefore, the yield stresses of MPEAs can be expressed as the sum of the lattice-friction stress and the grain-boundary strengthening:

$$\sigma_y = \sigma_f + \sigma_{gb} \quad (4)$$

For dual-phase MPEAs, we employed the rule of the mixture to calculate the overall yield strength

$$\sigma_{\text{mix}} = f_{\alpha}\sigma_{\alpha} + f_{\beta}\sigma_{\beta} \quad (5)$$

where  $\sigma_{\text{mix}}$  is the overall yield strength of the two-phase mixed system,  $\sigma_{\alpha}$  represents the yield strength of the  $\alpha$  phase, and  $\sigma_{\beta}$  denotes the yield strength of the  $\beta$  phase.  $f_{\alpha}$  and  $f_{\beta}$  represent the volume fractions of  $\alpha$  and  $\beta$  phases, respectively.

### Machine learning algorithm

**Five folds cross-validation strategy:** The appearance of over fitting and under fitting issue makes us have a wrong understanding of the performance of machine learning algorithm. Here, to accurately evaluate KNN, SVM and DT algorithms and improve the performance of these machine learning algorithms, five folds cross-validation strategy is adopted as shown in Fig. S2. In fact, the times of cross-validation has significant influence on evaluating the performance of machine learning algorithms. The less times of cross-validation probably will produce the large variation of standard deviation due to random division of data set. However, the excessive times will cause low efficiency. From the previous literature, we choose five folds cross validation strategy.<sup>1,2</sup> Firstly, the whole data set is divided into five equal nearly sub-data sets assigned by IDs (SD1, SD2, SD3,SD4, and SD5). Each sub-data set is adopted once as the testing data set and the left four data sets are used as training data sets. Using this strategy, the machine learning algorithm can be trained and tested five times in entire data set. The final accuracy value of each machine learning algorithm is the average of five testing results. The validation process gives us a reliable and accurate evaluation on machine learning algorithms. Such  $k$  folds cross-validation

method are also used in the previous work.<sup>1</sup> This average accuracy is correct enough to evaluate the performance of each machine learning algorithm.

**Early-stopping strategy:** When we try to train ANN model, we usually hope to obtain the best generalization performance. However, all standard ANN structures are easy to encounter over-fitting problem: when the network performs better and better in the training set, in fact, at a certain moment, its performance on the test set has begun to deteriorate. Early-stopping strategy<sup>3</sup> is a widely used method. Its basic guideline is to calculate the performance of the model on the validation set during training stage. When the accuracy of the model on the validation set begins to decline, and then we stop training process, which can avoid the over-fitting problem caused by continuous training.

**KNN:** The KNN algorithm is perhaps the most popular and straightforward classifier in machine learning. The samples are classified by querying from nearest neighbors, which are in the training dataset. Under the premise of the sufficient random access memory, this algorithm is usually useful to solve not only low-dimensional binary classification problems, but also high-dimensional multi-labels classification problems. To explain the simple idea of the KNN algorithm, In Fig. S3, the 4-nearest neighbors algorithm is described in a two-dimensional space. For the unknown sample 2, it can be seen that all four of its nearest neighbors are class  $\Delta$ , so the classification decision related to the unknown sample 2 is the class,  $\Delta$ . However, the circumstance for the unknown sample 1 is a bit complex since the nearest neighbors of the sample 1 are three of class,  $\times$ , and one of class,  $\Delta$ . The final classification decision for the unknown sample 1 should be made comprehensively from the distance and features weight. In Fig. S3, the pseudo code shows the general flow of the KNN algorithm.

From Fig. S3, it can be found that not only the K value, but also distance metrics have great influence on the classification accuracy. Assuming that the training samples have  $n$  features ( $X_{train}$ ), the general distance metrics between the training sample point and the sample point to be classified ( $X_{test}$ ) can be written as:

$$d(X_{train}, X_{test}) = \sum_{i=1}^n \omega_i d(X_{train}^i - X_{test}^i) \quad (6)$$

where  $\omega_i$  represents the weight of each feature. Several common distance metrics, including the Euclidean distance, cosine distance, and correlation distance, are evaluated in the present work.

**DT:** The DT algorithm is a common supervised learning method mainly used for solving classification problems. It can simulate the process of human decision-making, which usually depends on the observation of the input features and the existing experience. Meanwhile, as a kind of the greedy algorithm, every input feature is deeply mined for the most accurate classification result.<sup>4</sup> A simple example of the DT algorithm is presented as shown in Fig. S4. The architecture of DT consists of root nodes, branches, internal nodes and leaf nodes, which are arranged from top to bottom like a tree structure. The root node is at the top, and the internal nodes of the second layer are connected with the root node through branches. Internal nodes can continuously generate new internal nodes through branches. When new internal nodes cannot be generated, and each leaf node (terminal nodes) are generated on the branches. It indicates that the final decisions have been made.<sup>5</sup> The pseudo code in Fig. S4 shows the general flow of the decision algorithm.

The accuracy of a decision-tree algorithm can be greatly improved by choosing an appropriate splitting criterion at nodes, which usually depends on the “trial and error” method. Some common splitting criteria, including the Gini’s diversity index, the Twoing rule and Maximum deviance reduction,<sup>6</sup> which are also evaluated in the present work.

**SVM:** The SVM algorithm is an effective machine learning method to solve classification problems with high dimensional features. A general flow shown in Fig. S5 is to solve a classification problem using the SVM algorithm. The basic idea of SVM is to search for the linear classifier (hyper-space) with the maximum distance in the high dimensional feature space, which makes it different from the conventional perceptron (the hyperspace, which can correctly label a training data set; not required to ensure the maximum distance).<sup>7</sup> Given a training data set of  $\mathbf{T} = \{(\mathbf{x}_1, y_1), (\mathbf{x}_2, y_2), (\mathbf{x}_3, y_3), \dots, (\mathbf{x}_n, y_n)\}$ , where  $\mathbf{x}_i \in \mathbb{R}^n$  represents  $n$  features of each sample, and  $y_i \in \{-1, 1\}$  denotes two classes of the sample. Define the distance between the support vector and hyper-plane:

$$\theta = \min_{i=1,2,\dots,n} y_i \left( \frac{\boldsymbol{\omega}}{\|\boldsymbol{\omega}\|} \cdot \mathbf{x}_i + \frac{\mathbf{b}}{\|\boldsymbol{\omega}\|} \right) \quad (7)$$

Based on the basic idea about the SVM algorithm, the task for the optimal hyper-space can be transformed into an optimization problem under certain constraints. Here, a Lagrange multiplier is introduced to construct a Lagrange function for solving the optimization problem, which can be written:

$$L(\boldsymbol{\omega}, \mathbf{b}, \boldsymbol{\alpha}) = \frac{1}{2} \|\boldsymbol{\omega}\|^2 - \sum_{i=1}^n \alpha_i (y_i (\boldsymbol{\omega} \cdot \mathbf{x}_i + \mathbf{b}) - 1) \quad (8)$$

Then, by utilizing the duality of the Lagrange function, setting the partial derivative of the Lagrange function to  $\boldsymbol{\omega}$  and  $\mathbf{b}$  to 0, introducing penalty parameter,  $C$ , and embedding the kernel function,  $K(\mathbf{x}, \mathbf{y})$ , the SVM algorithm can be formulated as follows:

$$\left\{ \begin{array}{l} \min_{\alpha} \frac{1}{2} \sum_{i=1}^n \sum_{j=1}^n \alpha_i \alpha_j y_i y_j K(\mathbf{x}_i, \mathbf{x}_j) - \sum_{i=1}^n \alpha_i \\ \sum_{i=1}^n \alpha_i y_i = 0 \\ \mathbf{b}^* = y_j - \sum_{i=1}^n \alpha_i^* y_i K(\mathbf{x}_i, \mathbf{x}_j) \\ 0 \leq \alpha_i \leq C, i = 1, 2, 3, \dots, n \end{array} \right. \quad (9)$$

where  $\alpha^*$  represents the optimal Lagrange multiplier. Several common kernel functions, such as linear kernel, quadratic kernel, cubic kernel and Gaussian kernel for the SVM algorithm.

*ANN*: The architecture of ANN is a fully-connected network composed of an input layer, several hidden layers, and an output layer. The main function of the input layer is to perceive the external world by receiving some information, such as some specific data or signals. These information can be accepted in the form of real numbers, binary values, and integers. The following step is in the hidden layers. When the information passes through the hidden layers, the features are extracted and processed by neurons. The hidden layers undertake the most of calculations in whole internal processing. The output layer makes the final decision about the input information via integrating the results of the previous layers.<sup>8</sup>

Each layer is composed of neurons, which are fully connected with the input vector. Here, it should be noted that there is no connection between neurons in each layer and no cross-layer connection between neurons in different layers. All neurons in the ANN framework are forced to connect forward. In other words, the information transmission is continuous, and the recurrent or backward connection between neurons does not exist. The output of the  $j$ th neuron in the hidden layer,  $a_j$ , can be given via the following linear equation:

$$a_j = \sum_{i=1}^n \omega_i \cdot x_i + b_j \quad (10)$$

where  $\omega_i$  represents the weights relevant to the input variable,  $x_i$ , and  $b_j$  denotes the bias term, which is used to help activate the neurons in the case of that  $\sum_{i=1}^n x_i \cdot \omega_i$  equals zero. Furthermore, in a classification problem, the Softmax activation function is generally used in the output layer, which is defined as:

$$\text{Softmax}(z_i) = \frac{e^{z_i}}{\sum_{j=1}^n e^{z_j}} \quad (11)$$

where  $z_i$  represents the output of  $i$ th node in the output layer, and  $n$  is the number of classes.

Lastly, the cross-entropy function is used as the loss function, which is given by the formula:

$$\text{cross\_entropy} = -\sum_{i=1}^n q_i \log(p_i) \quad (12)$$

where  $q_i$  denotes the target class, and  $p_i$  represents the prediction probability. In addition, error (target output - predicted output) back propagation strategy is employed to update the  $\omega_i$  and  $b_j$  continuously.<sup>9</sup> A typical ANN architecture for phase prediction, which consists of an input layer, two hidden layers, and one output layer, is illustrated in Fig. S6.



## Supplementary Text 2

### Prediction of the optimal composition in the Al-Fe-Co-Cr-Ni-Mn system

Here, the optimal composition in the Al-Fe-Co-Cr-Ni-Mn system with high strength and good elongation is predicted by our proposed multistage design method. Based on the experimental data reported so far, we determine the target strength ( $> 800$  MPa) and elongation ( $> 10\%$ ). In view the fact that the alloy phase structure transformation from the single FCC structure to a duplex FCC plus BCC structure and then a single BCC structure with increasing the Al concentration in the Al-Fe-Co-Cr-Ni-Mn system. Thus, to meet the target strength, we obtain the initial composition scope of Al using a mathematical model by assuming the alloy is a single FCC phase structure. Considering elongation criteria ( $> 10\%$ ), we further narrow the component range of Al by our elongation prediction model. Subsequently, we determine the phase structure and the corresponding volume fraction in the selected component range by phase prediction model. Here, the detailed phase structure prediction is provided in Main Text “Phase prediction”. For phase volume fraction prediction, we establish the “composition - FCC/BCC volume fraction” data set using data augmentation strategy based on the reported research.<sup>10</sup> The data set can be found in Data S5. Then, a machine learning model is developed via the ANN algorithm for predicting phase fraction in the Al-Fe-Co-Cr-Ni-Mn system. The performance of the model is illustrated in Fig. S7. Then, we compute the yield strength and elongation of candidate MPEAs by the FP avenue, as presented in the Table S6. Finally, a new multi-phase MPEA ( $\text{Al}_{0.63}\text{Co}_{0.95}\text{Cr}_{0.95}\text{FeMn}_{0.74}\text{Ni}$ ) with the optimal combination of strength and elongation are determined. The errors between the predicted and experimental results demonstrated in Table S7 are within 10.0%, indicating that the proposed approach can accurately predict the properties of MPEAs.

### Supplementary Text 3

#### Performance for KNN, DT, SVM, and ANN on phase prediction

We exhibit the evaluation of the prediction accuracy using KNN with various distance metrics / K values in Fig. S8a. It proves that both the K value and distance metric have great influence on the final prediction accuracy. For the phase selection of MPEAs, we do not impose the previous knowledge on KNN as a limitation so as to only consider the effect of KNN itself on the classification result, that is, the weight of each input physical feature is ignored. The final classification result of KNN completely depends on the proportion of different phases in K nearest neighbors. For most of the distance metrics, when the K value is smaller, the KNN achieves higher prediction accuracy. Furthermore, the optimal K value/distance metric are selected for the phase prediction of MPEAs with various input features. The classification result in the form of the confusion matrix is shown in Figs. S8b-d. Here, the squares marked by green color represent the correct classification, and the number in them denotes the percentage of the correct classified samples in the total number of samples. From the confusion matrix, the reduction of input features can effectively improve the prediction accuracy on BCC and FCC structures whereas decreasing the accuracy on the BCC + FCC structure, which also indicates that the formation rule of a multi-phase structure is complex.

We evaluate the prediction accuracy of the DT algorithm with various input features on the condition of different split criteria in the form of a Receiver Operating Characteristic (ROC) curve <sup>11</sup> (The maximum deviance reduction, Gini's diversity index, and Twoing rule are the best split criteria for twelve/eleven/nine input features) in Figs. S9a-c. The ROC curve shows the competition between the true positive rate (TPR) and false positive rate (FPR) for different thresholds of classifiers. Meanwhile, the ROC curve can easily find out the ability of a classifier

to recognize samples at a certain threshold. The optimal threshold, which has the highest classification accuracy, can be obtained. Furthermore, the performance of the classifier in the regions of high sensitivity and high specificity can be evaluated. The area marked by blue shows an estimation of the overall performance of the classifier. A larger area indicates more accuracy for classification results. The point marked by red color shows the performance of the current classifier. It can be seen that the DT algorithm has the lower prediction accuracy than that of the KNN algorithm. This is because the DT algorithm, as a greedy algorithm, will over-exploit a single physical feature and easily ignores the correlation between input features, which makes the BCC + FCC structure more difficult to be predicted.

The classification results for the phase selection of MPEAs with twelve, eleven, and nine features via the Cubic kernel SVM algorithm (the best kernel for twelve/eleven/nine input features) are shown in Figs. S10a-c. Among them, the highest prediction accuracy is 81.2%, using the Cubic kernel SVM algorithm with nine features. Though the result reflects that the proposed feature engineering is feasible and effective for the Cubic kernel function in searching for the optimal hyperplane, such prediction accuracy still cannot perfectly solve the problem of phase selections in MPEAs. In fact, the SVM algorithm cannot effectively solve the problem of multi-label classification in essence. The ultimate goal of the SVM algorithm is to search for the optimal hyper-plane, which can completely distinguish different classes. Such a mechanism gives a great advantage, using SVM in binary classification problems. However, when applying the SVM algorithm to solve multi-label classification results, it has to transform them into multiple binary classification problems. Of course, when there are serious overlaps between the classes, the SVM algorithm cannot completely distinguish different classes. Therefore, errors accumulate in each search for the optimal hyper-plane until all classes are distinguished, which

leads to the low prediction accuracy of applying the SVM algorithm to solve the problem of the phase selection of MPEAs.

We present the confusion matrix plotted on the basis of the result of the ANN algorithm for the classification accuracy with twelve, eleven, and nine input features, respectively, in Figs. S11a-c. Generally, the ANN algorithm is sensitive with input features, and the redundant feature would significantly obstruct the efficiency and accuracy of the ANN model. Therefore, feature engineering becomes an indispensable step before using the ANN algorithm. Here, it can be seen that a regular feature engineering mean (11 features) cannot improve the prediction accuracy (the average accuracy of training data set, validation data set and testing data set, i.e., the average accuracy of the entire data set) whereas the accuracy of the ANN model reaches 89.1% based on the physics-based feature engineering strategy. These results not only demonstrate that the ANN model can accurately predict the phase selection of MPEAs, but also more importantly, indicate the feasibility and importance of the present physics-based feature engineering strategy.

## Supplementary Text 4

### Elongation prediction

We have calculated the yield strength of the MPEAs through the proposed multistage-design approach integrating machine learning, physical law and mathematical model. The mathematical model can take into account the microstructural features and crystal structure features of MPEAs, which is a very important bridge to relate fundamental material properties to macroscopic material behavior. However, a quantitative correlation between atomic scale deformation and macroscale elongation remains extremely challenging, due to the complex deformation and fracture mechanisms in MPEAs, including (i) the movement of the defect, such as the dislocation, void, and grain boundary, whose distribution and density are usually uncertain; (ii) the interaction between defects and between defect and microstructure, such as dislocation-void, and dislocation-distorted crystal structure; (iii) distribution and concentration of elements would affect the defect structure and motion; (iv) studies on the nucleation and propagation of voids and microcracks are still rare. In view of the fact that there is currently no suitable mathematical model to predict the elongation of MPEAs, we have to predict their elongation by embedding physical laws into machine learning. To predict elongation of MPEAs by adopting machine learning, the data set consisting of 64 entries (Data S6) is established by gathering the previous experimental results. In addition, in order to avoid the performance difference caused by the variation of process parameters and test conditions, the MPEAs in the data set are all produced by arc-melting and the elongation of the MPEA is measured under tension condition. We present the performance curve during the training stage using ANN in Fig. S12a. The mean squared error (MSE) <sup>12</sup> between the predicted and experimental values is as a loss function. Meanwhile, the early-stopping strategy is used to prevent the over-fitting problem. We further plots the

prediction results of a training data set, validation data set, test data set, and all data, respectively, as shown in Fig. S12b. The dotted line represents that the predicted value is completely consistent with the experiments. Furthermore, we linearly fit the predicted value with the experimental result in the form of the solid line. By comparing the distance between the solid lines and dotted lines, it can be found that our ANN model performs well on predicting the elongation of the MPEA.

## Supplementary Text 5

### Additional validation of the proposed multistage-design approach

In order to further demonstrate the validity comprehensively of the proposed multistage-design approach, the additional tensile experiment of  $\text{Al}_{0.55}\text{Co}_{0.9}\text{CrFe}_{0.95}\text{Mn}_{0.8}\text{Ni}_{0.8}$  MPEA has been carried out. The results show a yield strength of 691 MPa, the ultimate tensile strength of 1,029 MPa, and the elongation of 13.4% for  $\text{Al}_{0.55}\text{Co}_{0.9}\text{CrFe}_{0.95}\text{Mn}_{0.8}\text{Ni}_{0.8}$  MPEA (Fig. S13). These results are consistent with our predictions. The deviations between the predicted and experimental results exhibited in Table S8 are also within 10.0%, further demonstrating the proposed multistage-design approach can accurately predict the properties of MPEAs.

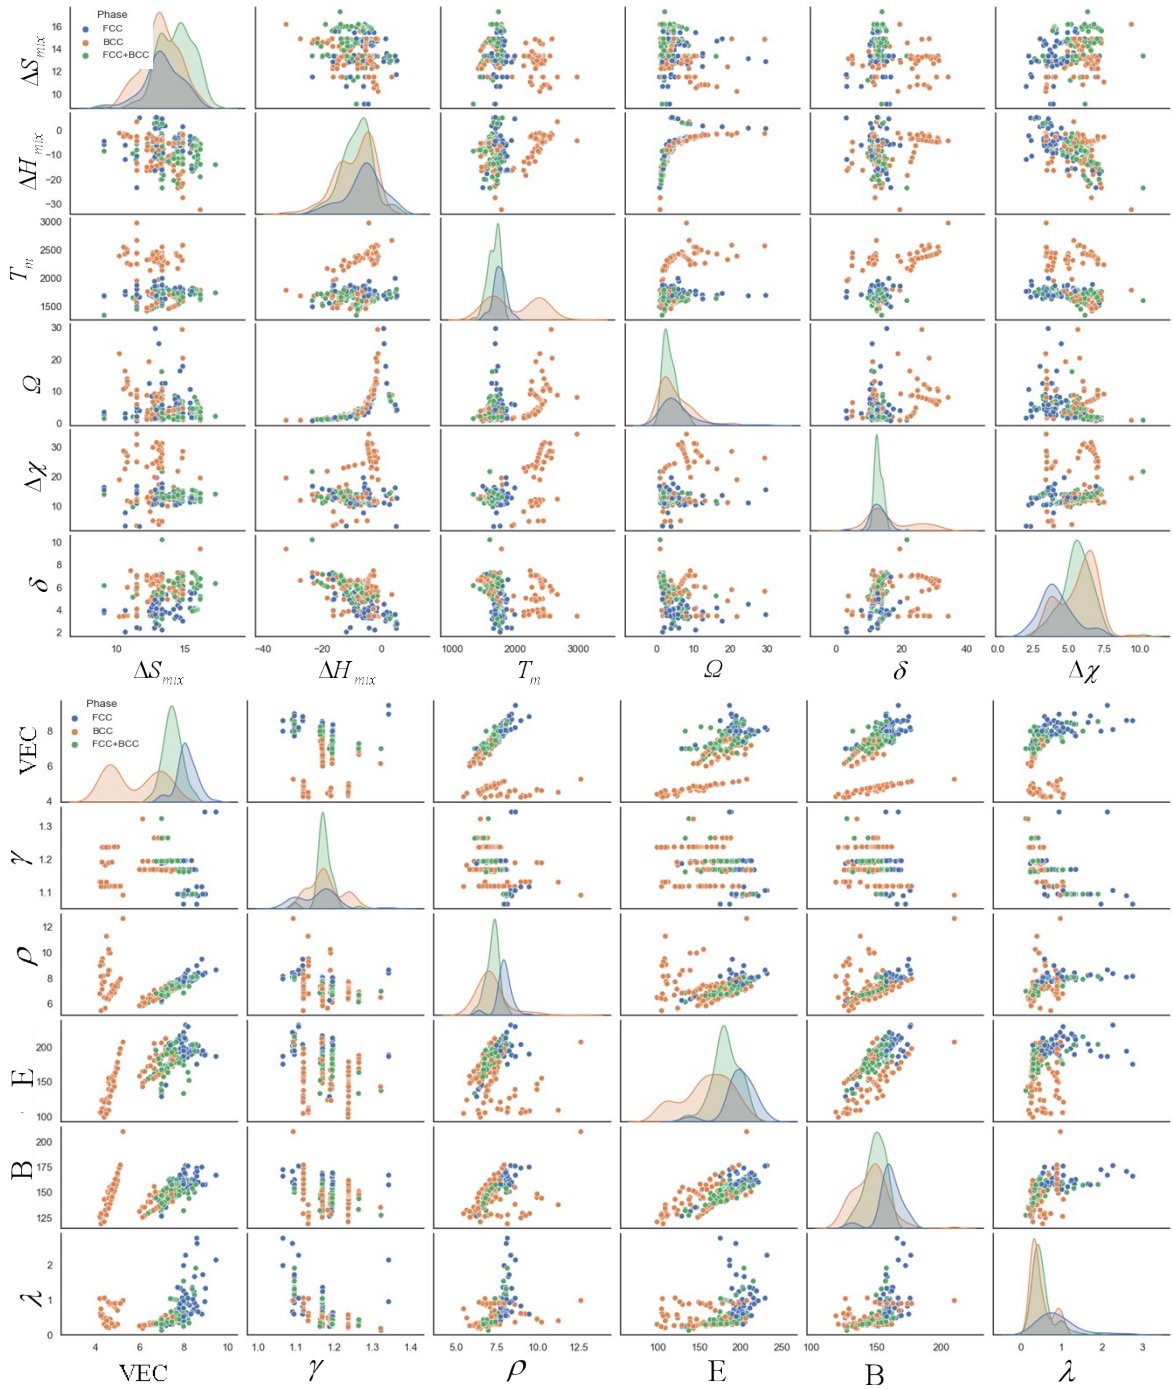

**Fig. S1. The correlation between 12 features that are related to the phase selection of MPEAs in the form of scatter matrix. The circles in scatter matrix are marked by different colors representing various phases.**



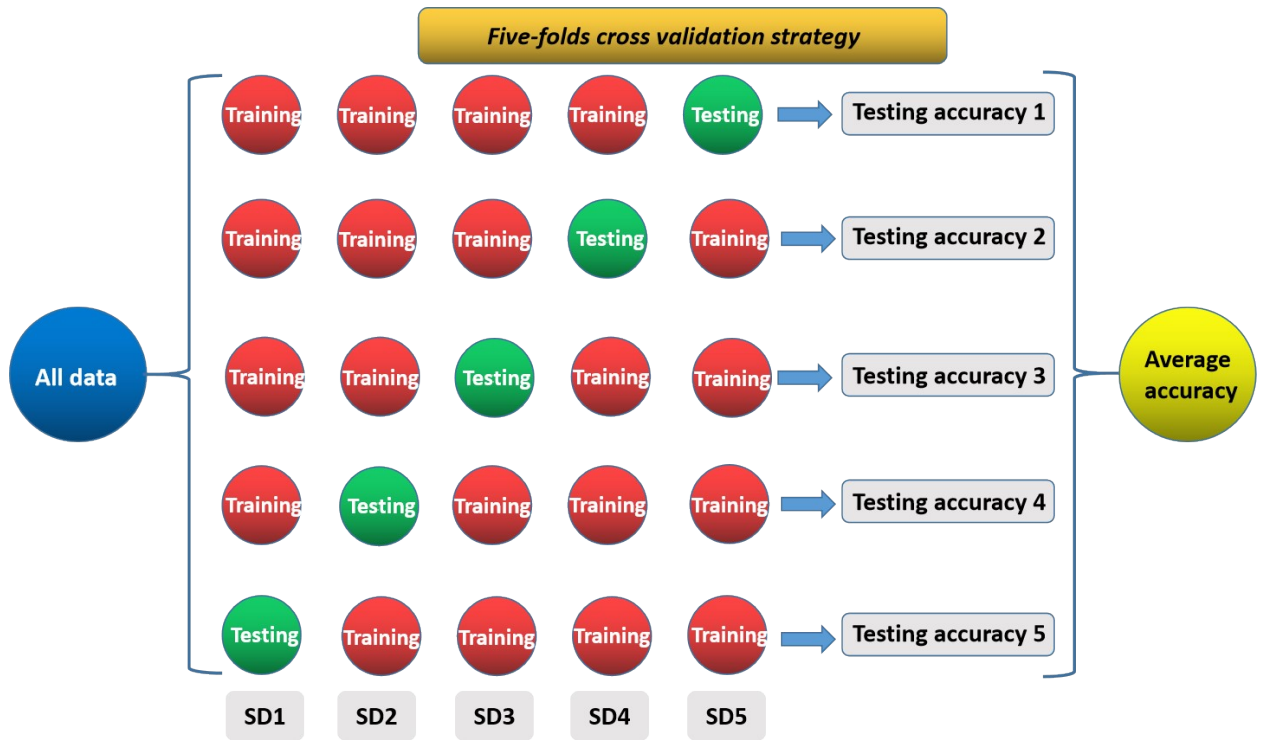

**Fig. S2. Five folds cross-validation strategy for SVM, KNN, and DT algorithm.**

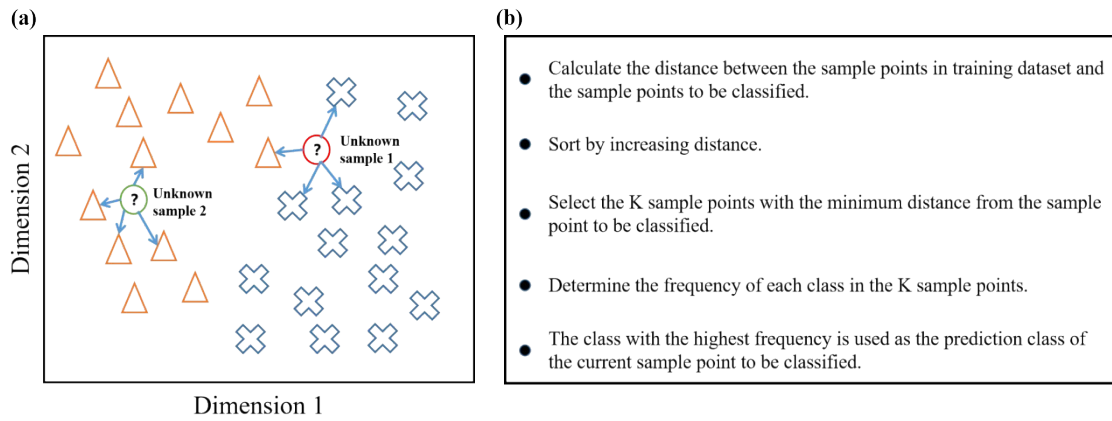

**Fig. S3. A typical workflow for KNN algorithm.** (a) Predict the class for the unknown sample 1 and the unknown sample 2 via four nearest neighbours algorithms. (b) The pseudo code for the KNN algorithm.

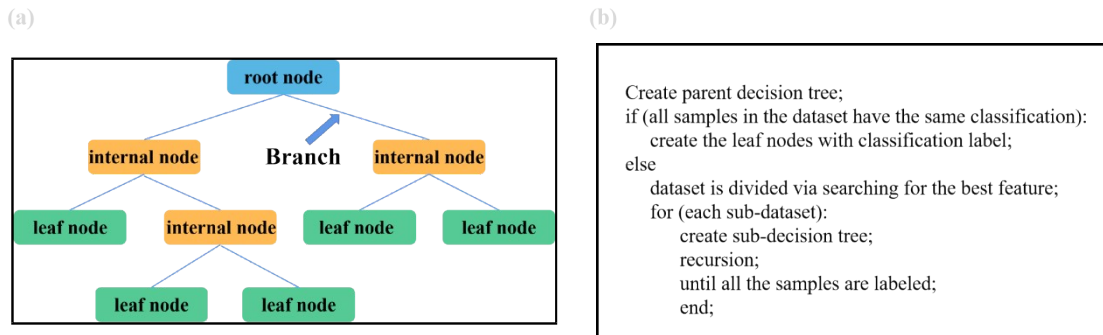

**Fig. S4. The simple architecture and pseudo code of DT.** (a) The simple architecture of DT consists of 1 root node, 8 branches, 3 internal nodes, and 4 leaf nodes. (b) The pseudo code for the DT algorithm.

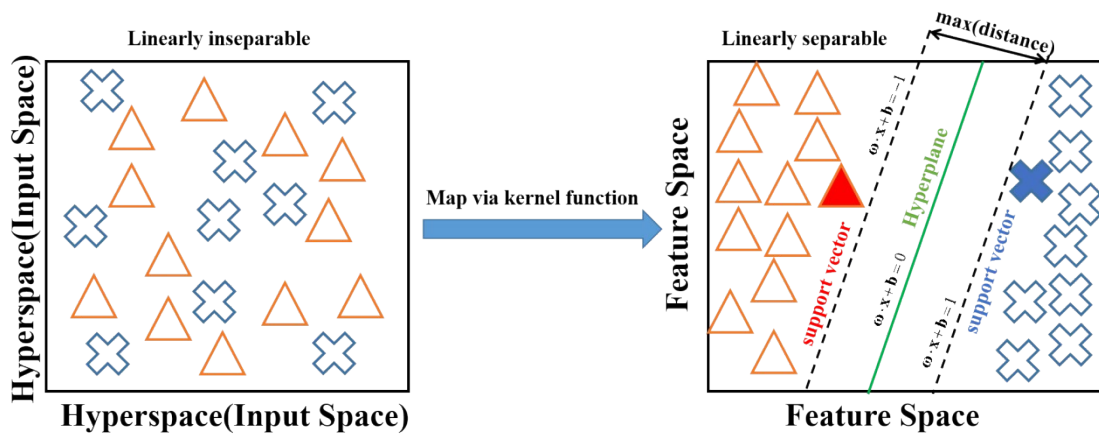

**Fig. S5. A general flow to solve a classification problem with high dimension using SVM.**

Transform the problem with linear inseparability to the problem with linear separability via kernel function.

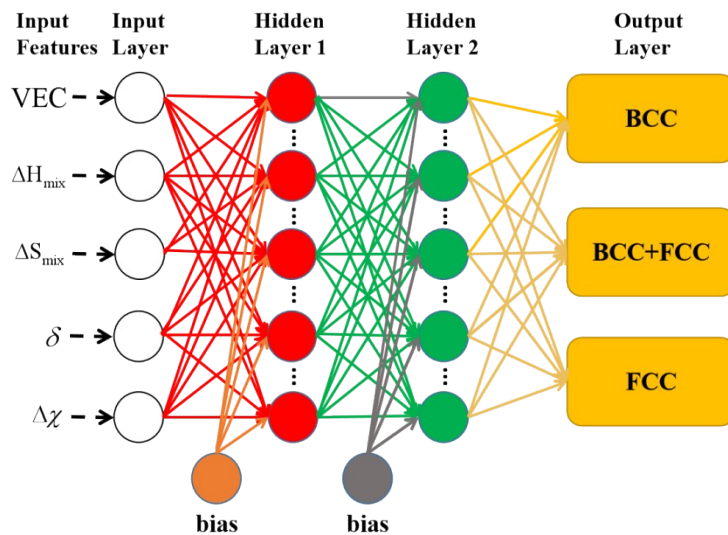

**Fig. S6. Fully-connected ANN structure for phase prediction.** A typical architecture of ANN consisting of an input layer, two hidden layers, and one output layer.

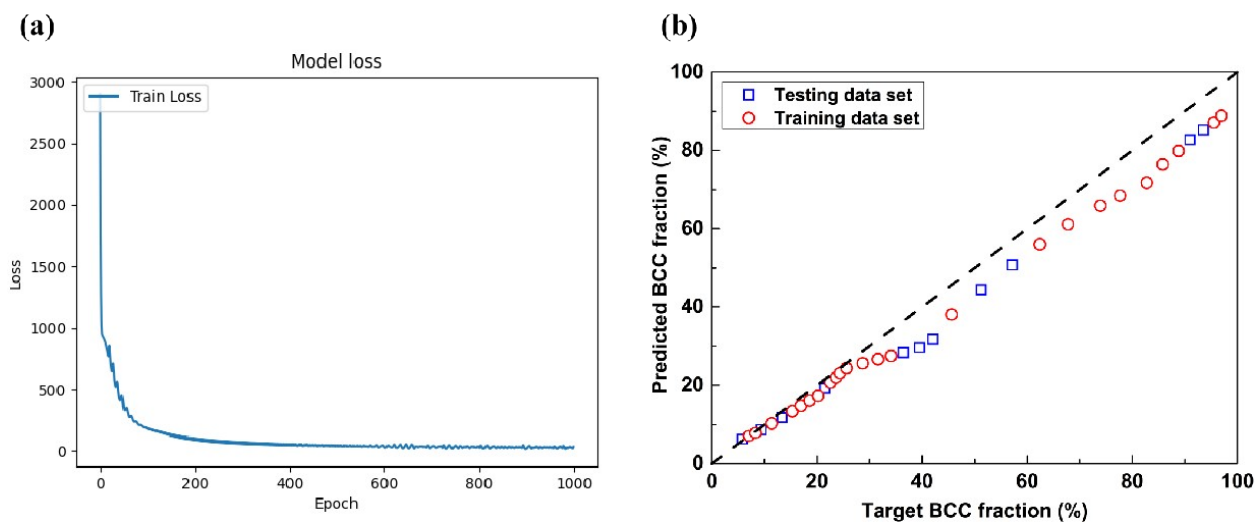

**Fig. S7. Performance evaluation of the ANN model for the phase fraction prediction. (a)** The performance curve of the ANN model. **(b)** The prediction results of a training data setest data set based on the ANN model.

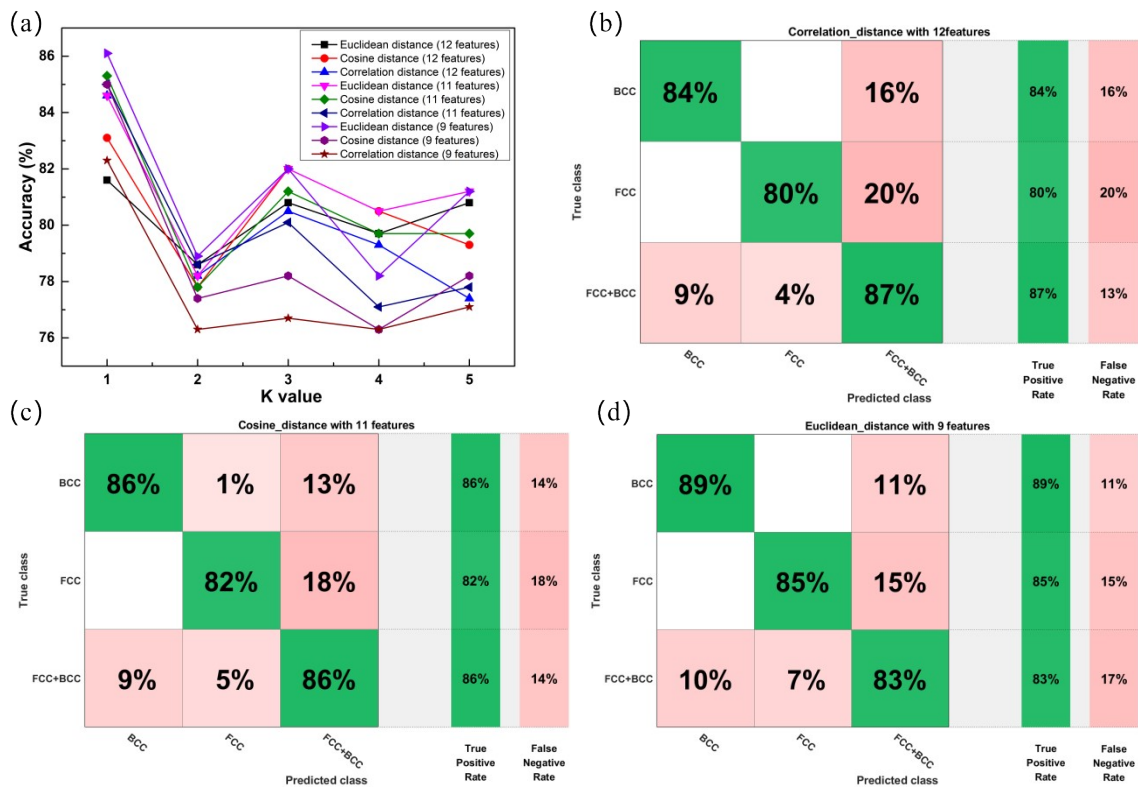

**Fig. S8. Performance evaluation of the KNN algorithm.** (a) The effect of the distance metric and K value on the prediction accuracy of the KNN algorithm with twelve/eleven/nine features. (b-d) The classification result in the form of a confusion matrix using the KNN algorithm with correlation, cosine, and Euclidean, distances, respectively.

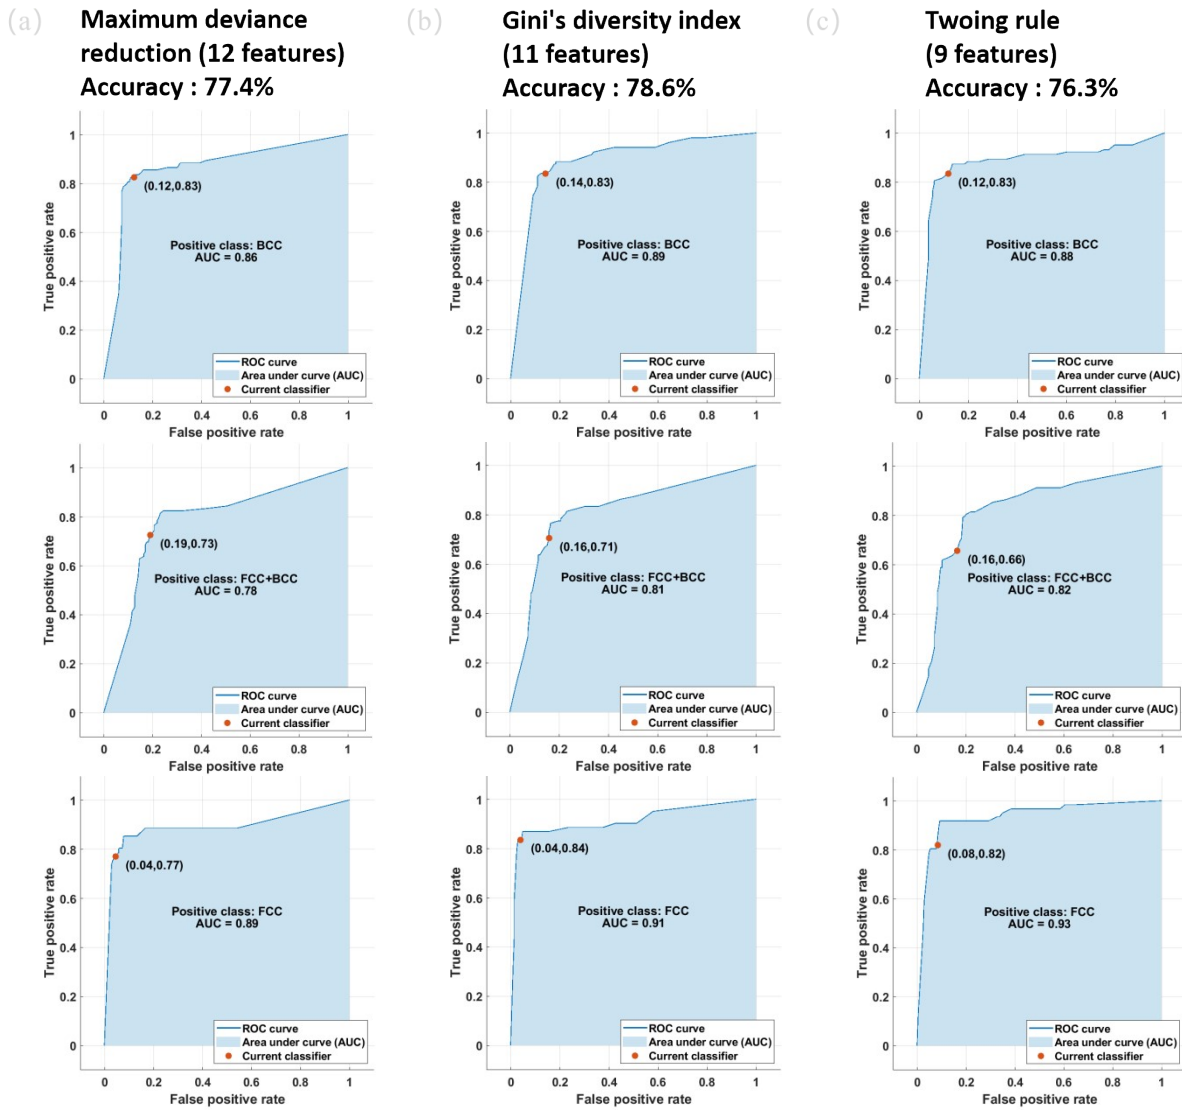

**Fig. S9. Performance evaluation of the DT algorithm.** (a-c) Evaluating the prediction accuracy of the DT algorithm with 12 features, 11 features, and 9 features, under the condition of different split criteria in the form of the ROC curve



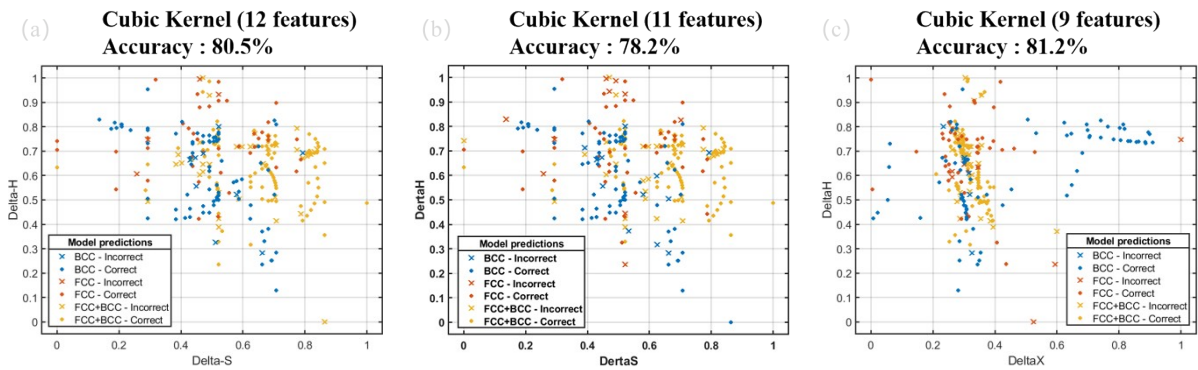

**Fig. S10. Performance evaluation of the SVM algorithm.** (a-c) The classification results for the phase selection of MPEAs with 12, 11, and 9 features, via the Cubic kernel SVM algorithm.

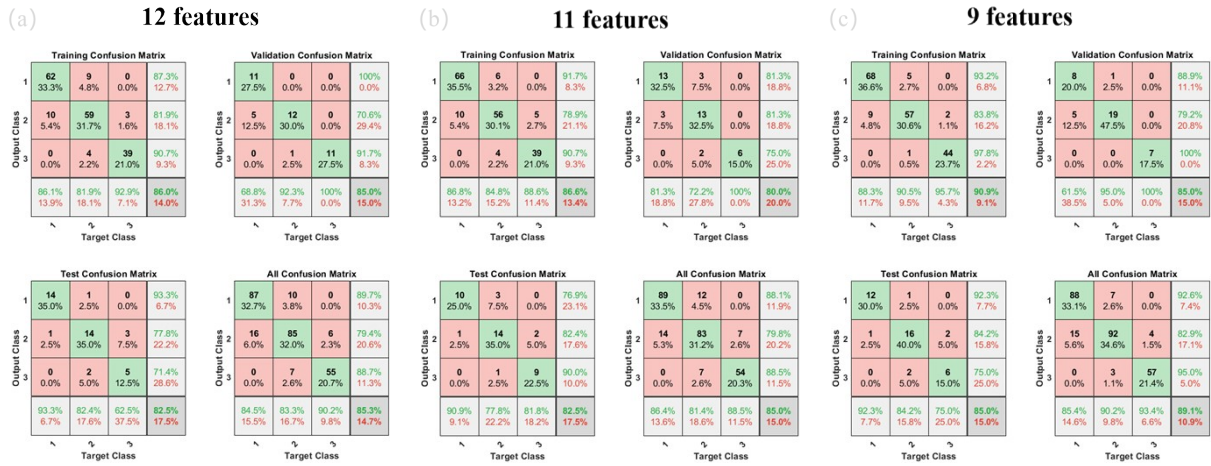

**Fig. S11. Performance evaluation of the ANN algorithm.** (a-c) The classification result in the training data set, validation data set, test data set and all data, using the ANN algorithm with 12 features, 11 features, and 9 features, respectively. Here, “1” represents BCC structure; “2” represents the BCC + FCC phase; “3” denotes the FCC phase.

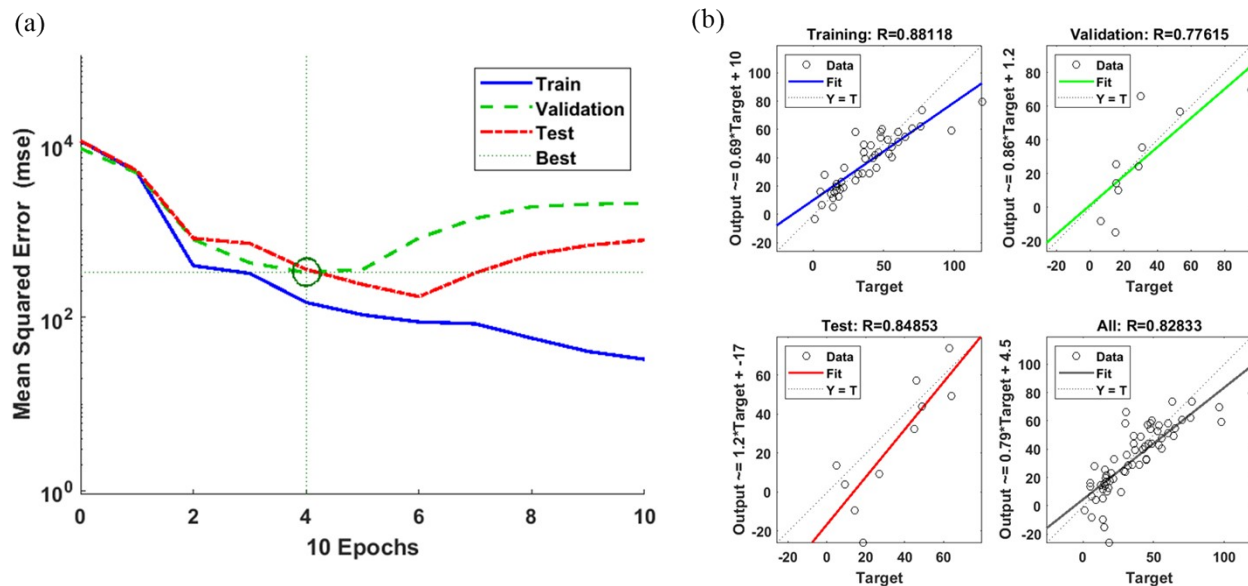

**Fig. S12. Performance evaluation of the machine learning model for the elongation prediction.** (a) The performance curve of the ANN model. (b) The prediction results of a training data set, validation data set, test data set, and all data based on the ANN model.

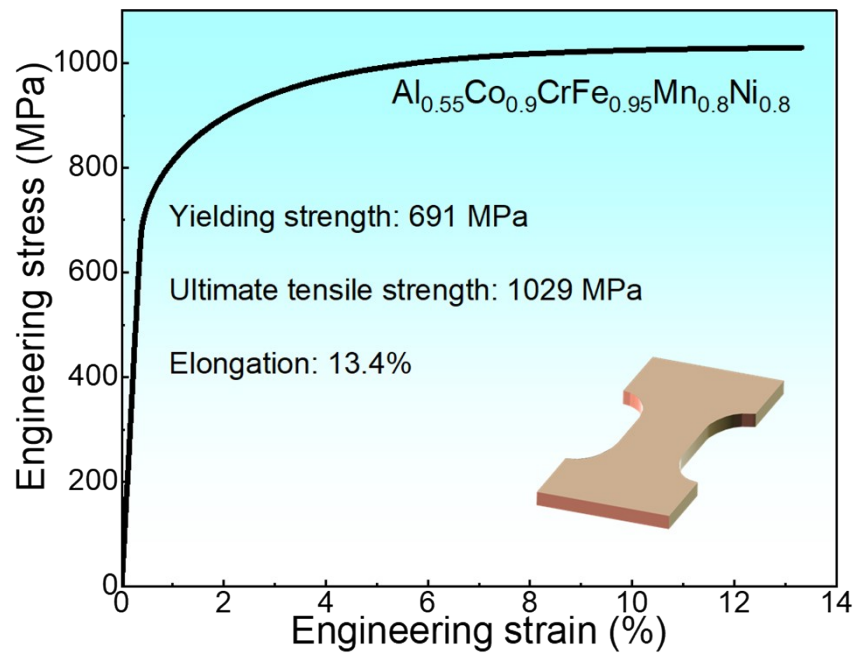

Fig. S13. Tensile stress-strain curve of the Al<sub>0.55</sub>Co<sub>0.9</sub>CrFe<sub>0.95</sub>Mn<sub>0.8</sub>Ni<sub>0.8</sub>.

**Table S1.** The description and formula of initial physical features.

| Abbreviation     | Formula                                                                                                                                          | Description                                  |
|------------------|--------------------------------------------------------------------------------------------------------------------------------------------------|----------------------------------------------|
| $\Delta S_{mix}$ | $\Delta S_{mix} = -R \sum_{i=1}^n c_i \ln c_i$                                                                                                   | Mixing Entropy <sup>13</sup>                 |
| $\Delta H_{mix}$ | $\Delta H_{mix} = 4 \sum_{i=1, i \neq j}^n c_i c_j H_{ij}^m$                                                                                     | Mixing Enthalpy <sup>13</sup>                |
| $T_m$            | $T_m = \sum_{i=1}^n x_i (T_m)_i$                                                                                                                 | Average melting temperature <sup>14</sup>    |
| $\Omega$         | $\Omega = \frac{T_m \Delta S_{mix}}{ H_{mix} }$                                                                                                  | The stability <sup>14</sup>                  |
| $\Delta\chi$     | $\Delta\chi = \sqrt{\sum_{i=1}^n c_i \left(1 - \frac{\chi_i}{\chi}\right)^2}$                                                                    | Electronegativity Mismatch <sup>13</sup>     |
| $\delta r$       | $\delta r = \sqrt{\sum_{i=1}^n c_i \left(1 - \frac{r_i}{r}\right)^2}$                                                                            | Atomic-Size Mismatch <sup>13</sup>           |
| $VEC$            | $VEC = \sum_{i=1}^n c_i VEC_i$                                                                                                                   | Valence Electron Concentration <sup>15</sup> |
| $\gamma$         | $\gamma = \left(1 - \sqrt{\frac{(r+r_{min})^2 - r^2}{(r+r_{min})^2}}\right) / \left(1 - \sqrt{\frac{(r+r_{max})^2 - r^2}{(r+r_{max})^2}}\right)$ | $\gamma$ parameter <sup>16</sup>             |
| $E$              | $E = \sum_{i=1}^n c_i E_i$                                                                                                                       | Young's Modulus                              |
| $B$              | $B = \sum_{i=1}^n c_i B_i$                                                                                                                       | Bulk Modulus                                 |
| $\rho$           | $\rho = \sum_{i=1}^n c_i \rho_i$                                                                                                                 | Density                                      |
| $\lambda$        | $\lambda = \frac{\Delta S_{mix}}{\delta^2}$                                                                                                      | A geometrical parameter <sup>17</sup>        |

**Table S2.** Data source of the prediction accuracy comparisons between different models.

| <b>MPEAs</b>                                    | <b>Experimental yield strength (MPa)</b> | <b>Classical solid-solution model <sup>18</sup></b> | <b>Senkov's model <sup>19</sup></b> | <b>Toda-Caraballo's model <sup>20</sup></b> | <b>Our model (MPa)</b> |
|-------------------------------------------------|------------------------------------------|-----------------------------------------------------|-------------------------------------|---------------------------------------------|------------------------|
| <b>CrCoFeNiMn <sup>21</sup></b>                 | <b>214</b>                               | <b>452</b>                                          | <b>260</b>                          | <b>373</b>                                  | <b>205</b>             |
| <b>TiNbTaZrHf <sup>21</sup></b>                 | <b>876</b>                               | <b>1,653</b>                                        | <b>1,094</b>                        | <b>331</b>                                  | <b>850</b>             |
| <b>Al<sub>0.5</sub>CrCoFeNiMn <sup>21</sup></b> | <b>357</b>                               | <b>589</b>                                          | <b>493</b>                          | <b>472</b>                                  | <b>381</b>             |
| <b>Average deviation (%)</b>                    |                                          | <b>88.1</b>                                         | <b>28.1</b>                         | <b>56.2</b>                                 | <b>4.6</b>             |
| <b>Average accuracy (%)</b>                     |                                          | <b>11.9</b>                                         | <b>71.9</b>                         | <b>43.8</b>                                 | <b>95.4</b>            |

**Table S3.** Chemical compositions of the  $\text{Al}_{0.63}\text{Co}_{0.95}\text{Cr}_{0.95}\text{FeMn}_{0.74}\text{Ni}$  alloy constituents in the as-cast condition, in atomic percent (at.%).

The data derived by the TEM-based EDS.

| <b>Constituent</b>       | <b>Al</b>   | <b>Co</b>   | <b>Cr</b>   | <b>Fe</b>   | <b>Ni</b>   | <b>Mn</b>   |
|--------------------------|-------------|-------------|-------------|-------------|-------------|-------------|
| <b>FCC</b>               | <b>13.7</b> | <b>16.3</b> | <b>20.5</b> | <b>20.6</b> | <b>15.8</b> | <b>13.1</b> |
| <b>B2</b>                | <b>35.8</b> | <b>13.4</b> | <b>4.7</b>  | <b>7.1</b>  | <b>26.0</b> | <b>13.0</b> |
| <b>BCC</b>               | <b>9.3</b>  | <b>13.4</b> | <b>37.9</b> | <b>24.7</b> | <b>5.9</b>  | <b>8.8</b>  |
| <b>Alloy composition</b> | <b>11.3</b> | <b>18.3</b> | <b>18.1</b> | <b>19.6</b> | <b>19.2</b> | <b>13.5</b> |

**Table S4.** Detailed information about the data sources for Fig. 5E.

|                              | <b>Alloys</b>                                                                             | <b>Yield Strength (MPa)</b> | <b>Elongation (%)</b> |
|------------------------------|-------------------------------------------------------------------------------------------|-----------------------------|-----------------------|
| <b>System and Subsystem:</b> | <b>Al<sub>0.56</sub>CoCrFeMnNi<sup>12</sup></b>                                           | <b>526</b>                  | <b>16</b>             |
|                              | <b>Al<sub>0.62</sub>CoCrFeMnNi<sup>12</sup></b>                                           | <b>833</b>                  | <b>5</b>              |
|                              | <b>Al<sub>0.67</sub>CoCrNiFe<sub>1.94</sub><sup>22</sup></b>                              | <b>866</b>                  | <b>7.9</b>            |
|                              | <b>AlCoCrFeNi<sub>2.15</sub><sup>23</sup></b>                                             | <b>545</b>                  | <b>16.5</b>           |
|                              | <b>CoCr<sub>0.38</sub>Fe<sub>0.15</sub>Ni<sub>0.15</sub><sup>24</sup></b>                 | <b>482</b>                  | <b>13.3</b>           |
|                              | <b>CrFeNi<sub>2.1</sub>Al<sub>0.9</sub><sup>25</sup></b>                                  | <b>610</b>                  | <b>9.1</b>            |
|                              | <b>CrFeNi<sub>2.2</sub>Al<sub>0.8</sub><sup>25</sup></b>                                  | <b>479</b>                  | <b>12.7</b>           |
|                              | <b>CrFeNi<sub>2</sub>Al<sup>25</sup></b>                                                  | <b>774</b>                  | <b>6.4</b>            |
|                              | <b>Al<sub>0.14</sub>Cr<sub>0.34</sub>FeMn<sub>0.8</sub>Ni<sub>0.57</sub><sup>26</sup></b> | <b>1,253</b>                | <b>6.78</b>           |
| <b>Other MPEAs</b>           | <b>FeCrCuMnNi<sup>27</sup></b>                                                            | <b>628</b>                  | <b>14.5</b>           |
|                              | <b>CoCrFeNi<sub>2.1</sub>Nb<sub>0.4</sub><sup>28</sup></b>                                | <b>640</b>                  | <b>7</b>              |
|                              | <b>CoCuFeMnNiSn<sub>0.05</sub><sup>29</sup></b>                                           | <b>475</b>                  | <b>12</b>             |
|                              | <b>CoCuFeNiSn<sub>0.1</sub><sup>30</sup></b>                                              | <b>602</b>                  | <b>5</b>              |
|                              | <b>NbTaTi<sup>31</sup></b>                                                                | <b>620</b>                  | <b>18.5</b>           |



**Table S5.** Detailed information about data sources for Fig. 6.

|                                      | <b>Exp.</b> |            | <b>Model +<br/>Exp.</b> |            | <b>High-<br/>throughput<br/>+ Exp.</b> |           | <b>Simul.<br/>Exp. +</b> |            | <b>Machine<br/>learning+<br/>Exp.</b> |           | <b>Our<br/>work</b> |          |
|--------------------------------------|-------------|------------|-------------------------|------------|----------------------------------------|-----------|--------------------------|------------|---------------------------------------|-----------|---------------------|----------|
|                                      | <b>C</b>    | <b>E</b>   | <b>C</b>                | <b>E</b>   | <b>C</b>                               | <b>E</b>  | <b>C</b>                 | <b>E</b>   | <b>C</b>                              | <b>E</b>  | <b>C</b>            | <b>E</b> |
| <b>MPEAs</b> <sup>32, 33</sup>       | <b>180</b>  | <b>300</b> | <b>6</b>                | <b>100</b> | <b>95</b>                              | <b>31</b> | <b>25</b>                | <b>38</b>  | <b>12</b>                             | <b>15</b> | <b>2</b>            | <b>2</b> |
| <b>Superalloys</b> <sup>34</sup>     | <b>120</b>  | <b>350</b> | <b>11</b>               | <b>210</b> | <b>130</b>                             | <b>61</b> | <b>35</b>                | <b>65</b>  | <b>11</b>                             | <b>19</b> | -                   | -        |
| <b>Mg-alloys</b> <sup>35, 36</sup>   | <b>150</b>  | <b>200</b> | <b>8</b>                | <b>90</b>  | <b>80</b>                              | <b>50</b> | <b>37</b>                | <b>110</b> | <b>9</b>                              | <b>7</b>  | -                   | -        |
| <b>Stainless steel</b> <sup>37</sup> | <b>92</b>   | <b>200</b> | <b>7</b>                | <b>190</b> | <b>58</b>                              | <b>25</b> | <b>25</b>                | <b>110</b> | <b>18</b>                             | <b>7</b>  | -                   | -        |
| <b>Al-alloys</b> <sup>35, 38</sup>   | <b>70</b>   | <b>280</b> | <b>12</b>               | <b>110</b> | <b>52</b>                              | <b>40</b> | <b>25</b>                | <b>39</b>  | <b>8</b>                              | <b>11</b> | -                   | -        |

C represents cost (pieces); E denotes efficiency (days)

**Table S6. Optimal composition.** The predicted yield strengths and elongations of candidate MPEAs as well as the corresponding compositions and volume fractions of the FCC/BCC structures.

| Al (at. %) | Fe (at. %) | Co (at. %) | Cr (at. %) | Ni (at. %) | Mn (at. %) | BCC (%) | FCC (%) | Elongation (%) | Yield Strength (MPa) |
|------------|------------|------------|------------|------------|------------|---------|---------|----------------|----------------------|
| 12.00      | 19.08      | 18.07      | 18.35      | 18.80      | 13.7       | 29.50   | 70.50   | 13.28          | 833.80               |
| 11.00      | 17.57      | 19.57      | 19.24      | 16.06      | 16.56      | 22.46   | 77.54   | 15.38          | 740.15               |
| 10.00      | 19.59      | 17.55      | 16.43      | 17.88      | 18.55      | 18.44   | 81.56   | 18.81          | 663.61               |
| 10.00      | 19.89      | 18.94      | 18.99      | 16.94      | 15.24      | 14.85   | 85.15   | 18.87          | 646.38               |
| 10.00      | 16.91      | 17.07      | 19.94      | 18.95      | 17.13      | 17.33   | 82.67   | 19.44          | 651.60               |
| 10.00      | 18.80      | 19.14      | 17.09      | 18.26      | 16.70      | 14.58   | 85.42   | 19.68          | 647.57               |
| 10.00      | 19.52      | 17.36      | 16.38      | 16.86      | 19.87      | 20.41   | 79.59   | 18.12          | 673.73               |
| 10.00      | 18.58      | 17.80      | 16.30      | 17.66      | 19.65      | 19.52   | 80.48   | 18.79          | 669.24               |
| 9.00       | 16.55      | 19.94      | 16.89      | 16.34      | 21.27      | 12.05   | 87.95   | 22.86          | 582.40               |
| 10.00      | 17.37      | 16.85      | 19.08      | 17.60      | 19.09      | 20.20   | 79.80   | 18.26          | 667.51               |
| 10.00      | 19.65      | 19.42      | 19.00      | 16.03      | 15.90      | 15.35   | 84.65   | 18.51          | 649.26               |
| 10.00      | 16.54      | 19.26      | 18.09      | 18.33      | 17.79      | 15.38   | 84.62   | 20.00          | 649.77               |
| 10.00      | 16.69      | 16.09      | 19.01      | 17.00      | 21.21      | 23.98   | 76.02   | 17.67          | 688.23               |
| 10.00      | 16.17      | 16.57      | 18.05      | 17.85      | 21.36      | 23.13   | 76.87   | 18.52          | 686.04               |
| 10.00      | 16.65      | 19.61      | 16.62      | 18.00      | 19.11      | 16.65   | 83.35   | 19.94          | 658.91               |
| 11.00      | 18.16      | 16.72      | 16.74      | 19.58      | 17.80      | 24.57   | 75.43   | 16.14          | 750.28               |
| 11.00      | 18.48      | 17.32      | 18.79      | 18.26      | 16.15      | 22.97   | 77.03   | 15.62          | 739.46               |
| 11.00      | 18.32      | 17.82      | 19.23      | 18.28      | 15.35      | 21.68   | 78.32   | 15.90          | 733.43               |
| 10.00      | 17.05      | 17.48      | 17.89      | 16.03      | 21.55      | 22.71   | 77.29   | 17.71          | 686.09               |
| 11.00      | 18.52      | 17.89      | 16.16      | 18.80      | 17.64      | 23.41   | 76.59   | 16.15          | 747.37               |
| 10.00      | 16.65      | 18.48      | 18.60      | 16.25      | 20.03      | 19.66   | 80.34   | 18.27          | 669.98               |
| 11.00      | 19.31      | 19.34      | 19.75      | 17.42      | 13.18      | 18.80   | 81.20   | 16.30          | 724.06               |
| 11.00      | 18.41      | 19.09      | 19.31      | 17.62      | 14.56      | 20.08   | 79.92   | 16.09          | 728.67               |
| 10.00      | 16.67      | 19.80      | 16.53      | 16.47      | 20.54      | 18.43   | 81.57   | 19.22          | 669.54               |
| 11.00      | 16.46      | 18.32      | 18.10      | 19.47      | 16.65      | 21.36   | 78.64   | 16.81          | 735.78               |
| 11.00      | 17.14      | 16.75      | 15.82      | 18.93      | 20.35      | 28.52   | 71.48   | 15.85          | 771.88               |
| 11.00      | 17.04      | 16.28      | 17.02      | 18.31      | 20.35      | 29.19   | 70.81   | 15.26          | 773.29               |
| 11.00      | 15.81      | 17.59      | 17.76      | 19.63      | 18.21      | 24.03   | 75.97   | 16.63          | 748.66               |
| 11.00      | 18.98      | 16.80      | 15.95      | 16.69      | 20.57      | 28.72   | 71.28   | 14.63          | 773.84               |
| 11.00      | 17.01      | 19.12      | 15.90      | 19.06      | 17.92      | 22.33   | 77.67   | 16.90          | 745.38               |
| 12.00      | 19.45      | 15.90      | 17.93      | 19.02      | 15.70      | 40.78   | 59.22   | 12.53          | 879.29               |
| 11.00      | 17.91      | 17.65      | 19.20      | 15.97      | 18.27      | 26.39   | 73.61   | 14.45          | 755.99               |
| 11.00      | 16.99      | 19.58      | 17.42      | 17.89      | 17.12      | 21.56   | 78.44   | 16.35          | 740.00               |
| 11.00      | 18.89      | 19.01      | 16.85      | 16.07      | 18.19      | 24.27   | 75.73   | 15.13          | 752.92               |
| 12.00      | 19.13      | 16.87      | 18.22      | 19.25      | 14.53      | 34.57   | 65.43   | 13.02          | 853.50               |
| 11.00      | 18.12      | 19.77      | 15.83      | 17.26      | 18.02      | 22.72   | 77.28   | 16.10          | 748.45               |
| 11.00      | 16.03      | 16.63      | 18.13      | 17.45      | 20.75      | 29.70   | 70.30   | 14.89          | 776.51               |
| 12.00      | 18.94      | 15.65      | 16.63      | 18.94      | 17.83      | 43.57   | 56.43   | 12.28          | 894.89               |

|       |       |       |       |       |       |       |       |       |         |
|-------|-------|-------|-------|-------|-------|-------|-------|-------|---------|
| 12.00 | 19.21 | 15.97 | 19.07 | 17.74 | 16.01 | 44.26 | 55.74 | 11.94 | 890.53  |
| 11.00 | 18.19 | 18.49 | 17.07 | 15.85 | 19.41 | 26.23 | 73.77 | 14.81 | 761.69  |
| 12.00 | 19.08 | 17.27 | 17.48 | 18.68 | 15.49 | 34.56 | 65.44 | 12.77 | 855.39  |
| 11.00 | 16.64 | 19.72 | 17.66 | 17.23 | 17.75 | 22.56 | 77.44 | 16.06 | 744.78  |
| 12.00 | 19.52 | 19.52 | 17.44 | 18.81 | 12.71 | 23.44 | 76.56 | 13.88 | 815.30  |
| 12.00 | 18.81 | 19.14 | 15.87 | 19.56 | 14.61 | 24.80 | 75.20 | 13.86 | 822.17  |
| 12.00 | 17.74 | 18.53 | 19.58 | 19.44 | 12.71 | 26.81 | 73.19 | 14.01 | 820.11  |
| 12.00 | 18.21 | 19.34 | 16.62 | 19.52 | 14.32 | 24.39 | 75.61 | 14.01 | 818.78  |
| 12.00 | 18.12 | 16.01 | 17.36 | 18.13 | 18.38 | 45.24 | 54.76 | 11.98 | 901.27  |
| 12.00 | 18.98 | 16.55 | 15.73 | 17.30 | 19.45 | 39.52 | 60.48 | 11.88 | 882.47  |
| 12.00 | 18.58 | 17.24 | 17.40 | 16.73 | 18.06 | 40.41 | 59.59 | 11.80 | 881.49  |
| 12.00 | 19.12 | 16.37 | 16.74 | 16.05 | 19.72 | 42.60 | 57.40 | 11.25 | 894.77  |
| 12.00 | 16.79 | 16.89 | 18.16 | 17.91 | 18.24 | 43.05 | 56.95 | 12.14 | 891.86  |
| 12.00 | 18.13 | 15.78 | 17.52 | 15.85 | 20.72 | 48.38 | 51.62 | 10.93 | 920.23  |
| 12.00 | 17.65 | 17.77 | 19.44 | 15.84 | 17.29 | 41.39 | 58.61 | 11.59 | 880.99  |
| 12.00 | 17.30 | 19.60 | 17.86 | 16.80 | 16.45 | 29.80 | 70.20 | 12.75 | 838.32  |
| 12.00 | 17.67 | 16.68 | 17.99 | 15.69 | 19.97 | 46.95 | 53.05 | 11.13 | 911.96  |
| 12.00 | 18.19 | 18.03 | 15.82 | 15.89 | 20.07 | 35.61 | 64.39 | 11.77 | 869.74  |
| 13.00 | 18.59 | 19.34 | 19.24 | 18.90 | 10.93 | 46.87 | 53.13 | 11.29 | 976.79  |
| 12.00 | 16.99 | 19.01 | 18.29 | 16.01 | 17.71 | 34.60 | 65.40 | 12.15 | 858.07  |
| 12.00 | 17.23 | 16.00 | 15.70 | 15.74 | 23.34 | 41.23 | 58.77 | 11.14 | 903.97  |
| 13.00 | 17.87 | 17.13 | 19.31 | 18.77 | 13.92 | 60.92 | 39.08 | 10.10 | 1029.14 |
| 13.00 | 18.32 | 15.94 | 16.84 | 18.30 | 17.59 | 72.94 | 27.06 | 9.24  | 1087.96 |
| 13.00 | 19.09 | 16.36 | 18.17 | 16.24 | 17.14 | 73.09 | 26.91 | 8.73  | 1082.99 |
| 13.00 | 18.77 | 19.06 | 16.03 | 16.69 | 16.45 | 63.87 | 36.13 | 9.70  | 1052.86 |
| 13.00 | 15.84 | 17.39 | 16.69 | 19.15 | 17.93 | 67.98 | 32.02 | 9.98  | 1074.23 |
| 13.00 | 16.00 | 16.87 | 18.47 | 18.17 | 17.49 | 71.25 | 28.75 | 9.48  | 1080.78 |
| 13.00 | 17.56 | 18.76 | 15.50 | 17.25 | 17.94 | 65.99 | 34.01 | 9.75  | 1065.07 |
| 13.00 | 18.22 | 18.24 | 15.97 | 15.99 | 18.58 | 68.55 | 31.45 | 9.15  | 1074.41 |
| 13.00 | 16.50 | 17.45 | 16.49 | 16.64 | 19.92 | 72.76 | 27.24 | 9.05  | 1096.68 |

**Table S7. Predicted results versus Experimental results.** The comparison between the properties of predictions and those of experiments in the  $\text{Al}_{0.63}\text{Co}_{0.95}\text{Cr}_{0.95}\text{FeMn}_{0.74}\text{Ni}$  MPEA

|                                                                                                 | <b>Predictive results</b> |                |                 |               | <b>Experimental results</b> |                |                 |               |
|-------------------------------------------------------------------------------------------------|---------------------------|----------------|-----------------|---------------|-----------------------------|----------------|-----------------|---------------|
| <b>MPEA composition</b>                                                                         | <b>BCC (%)</b>            | <b>FCC (%)</b> | <b>YS (MPa)</b> | <b>EL (%)</b> | <b>BCC (%)</b>              | <b>FCC (%)</b> | <b>YS (MPa)</b> | <b>EL (%)</b> |
| <b><math>\text{Al}_{0.63}\text{Co}_{0.95}\text{Cr}_{0.95}\text{FeMn}_{0.74}\text{Ni}</math></b> | <b>29.69</b>              | <b>70.31</b>   | <b>954</b>      | <b>13.4</b>   | <b>28</b>                   | <b>72</b>      | <b>880</b>      | <b>12.3</b>   |

**Table S8. Predicted results versus Experimental results.** The comparison between the properties of predictions and experiments of  $\text{Al}_{0.55}\text{Co}_{0.9}\text{CrFe}_{0.95}\text{Mn}_{0.8}\text{Ni}_{0.8}$  MPEA.

| <b>MPEA composition</b>                                                                             | <b>Predictive results</b> |               | <b>Experimental results</b> |               |
|-----------------------------------------------------------------------------------------------------|---------------------------|---------------|-----------------------------|---------------|
|                                                                                                     | <b>YS (MPa)</b>           | <b>EL (%)</b> | <b>YS (MPa)</b>             | <b>EL (%)</b> |
| <b><math>\text{Al}_{0.55}\text{Co}_{0.9}\text{CrFe}_{0.95}\text{Mn}_{0.8}\text{Ni}_{0.8}</math></b> | <b>730</b>                | <b>14.5</b>   | <b>691</b>                  | <b>13.4</b>   |

**Data S1. The initial data collected from the experiments (separate file)**

The initial data set includes 325 entries derived from the experiments in the prior research, including alloy compositions, phase structures and references.

| Alloys          | Phases  | Reference                                                                                                                                                                                                          |
|-----------------|---------|--------------------------------------------------------------------------------------------------------------------------------------------------------------------------------------------------------------------|
| CoFeNi          | FCC     | T.T. Zuo, R.B. Li, X.J. Ren, Y. Zhang, Effects of Al and Si addition on the structure and properties of CoFeNi equal atomic ratio alloy, <i>J. Magn. Magn. Mater.</i> 371 (2014) 60–68.                            |
| CoFeNiSi0.25    | FCC     |                                                                                                                                                                                                                    |
| Al0.25CoFeNi    | FCC     |                                                                                                                                                                                                                    |
| Al0.5CoFeNi     | FCC+BCC |                                                                                                                                                                                                                    |
| Al0.75CoFeNi    | FCC+BCC |                                                                                                                                                                                                                    |
| AlCoFeNi        | BCC     |                                                                                                                                                                                                                    |
| CoFeNi          | FCC     | Z. Wu, H. Bei, G.M. Pharr, E.P. George, Temperature dependence of the mechanical properties of equiatomic solid solution alloys with face-centered cubic crystal structures, <i>Acta Mater.</i> 81 (2014) 428–441. |
| CoCrNi          | FCC     |                                                                                                                                                                                                                    |
| CoMnNi          | FCC     |                                                                                                                                                                                                                    |
| FeMnNi          | FCC     |                                                                                                                                                                                                                    |
| CoCrFeNi        | FCC     |                                                                                                                                                                                                                    |
| CoCrMnNi        | FCC     |                                                                                                                                                                                                                    |
| CoFeMnNi        | FCC     |                                                                                                                                                                                                                    |
| CoCrFeNi        | FCC     | Y.F. Kao, T.J. Chen, S.K. Chen, J.W. Yeh, Microstructure and mechanical property of as-cast, -homogenized, and -deformed Al <sub>x</sub> CoCrFeNi high entropy alloys, <i>J. Alloy. Compd.</i> 488 (2009) 57–64.   |
| CoCrFeNi        | FCC     |                                                                                                                                                                                                                    |
| Al0.25CoCrFeNi  | FCC     |                                                                                                                                                                                                                    |
| Al0.25CoCrFeNi  | FCC     |                                                                                                                                                                                                                    |
| Al0.375CoCrFeNi | FCC     |                                                                                                                                                                                                                    |
| Al0.375CoCrFeNi | FCC     |                                                                                                                                                                                                                    |
| Al0.5CoCrFeNi   | FCC+BCC |                                                                                                                                                                                                                    |
| Al0.5CoCrFeNi   | FCC+BCC |                                                                                                                                                                                                                    |
| Al0.75CoCrFeNi  | FCC+BCC |                                                                                                                                                                                                                    |
| Al0.75CoCrFeNi  | FCC+BCC |                                                                                                                                                                                                                    |
| Al0.875CoCrFeNi | BCC     |                                                                                                                                                                                                                    |
| Al0.875CoCrFeNi | FCC+BCC |                                                                                                                                                                                                                    |
| AlCoCrFeNi      | BCC     |                                                                                                                                                                                                                    |
| AlCoCrFeNi      | FCC+BCC |                                                                                                                                                                                                                    |
| Al1.25CoCrFeNi  | BCC     |                                                                                                                                                                                                                    |
| Al1.25CoCrFeNi  | BCC     |                                                                                                                                                                                                                    |
| Al1.5CoCrFeNi   | BCC     |                                                                                                                                                                                                                    |
| Al1.5CoCrFeNi   | BCC     |                                                                                                                                                                                                                    |
| Al2CoCrFeNi     | BCC     |                                                                                                                                                                                                                    |
| Al2CoCrFeNi     | BCC     |                                                                                                                                                                                                                    |

|                                                                             |         |                                                                                                                                                                                                                                 |
|-----------------------------------------------------------------------------|---------|---------------------------------------------------------------------------------------------------------------------------------------------------------------------------------------------------------------------------------|
| Al <sub>2</sub> CoCrFeMo <sub>0.5</sub> Ni                                  | BCC     | C.-Y. Hsu, C.-C. Juan, T.-S. Sheu, S.-K. Chen, J.-W. Yeh, Effect of aluminum content on microstructure and mechanical properties of Al <sub>x</sub> CoCrFeMo <sub>0.5</sub> Ni high-entropy alloys, JOM 65 (2013) 1840–1847.    |
| CoCrFeNiTi                                                                  | FCC     | K.B. Zhang, Z.Y. Fu, J.Y. Zhang, W.M. Wang, H. Wang, Y.C. Wang, Q.J. Zhanga, J. Shi, Microstructure and mechanical properties of CoCrFeNiTiAl <sub>x</sub> high entropy alloys, Mater. Sci. Eng. A 508 (2009) 214–219.          |
| Al <sub>1.5</sub> CoCrFeNiTi                                                | BCC     |                                                                                                                                                                                                                                 |
| Al <sub>2</sub> CoCrFeNiTi                                                  | BCC     |                                                                                                                                                                                                                                 |
| Co <sub>1.5</sub> CrFeNi <sub>1.5</sub> Ti <sub>0.5</sub>                   | FCC     | M.-H. Chuang, M.-H. Tsai, W.-R. Wang, S.-J. Lin, J.-W. Yeh, Microstructure and wear behavior of Al <sub>x</sub> Co <sub>1.5</sub> CrFeNi <sub>1.5</sub> Ti <sub>y</sub> highentropy alloys, Acta Mater. 59 (2011) 6308–6317.    |
| Al <sub>0.2</sub> Co <sub>1.5</sub> CrFeNi <sub>1.5</sub> Ti <sub>0.5</sub> | FCC     |                                                                                                                                                                                                                                 |
| Al <sub>0.7</sub> Co <sub>0.3</sub> CrFeNi                                  | FCC+BCC | Weiping Chen, Zhiqiang Fu, Sicong Fang, Huaqiang Xiao, Dezhi Zhu, Alloying behavior, microstructure and mechanical properties in a FeNiCrCo <sub>0.3</sub> Al <sub>0.7</sub> high entropy alloy, Mater. Des. 51 (2013) 854–860. |
| Al <sub>0.875</sub> CoCrFeNi                                                | FCC+BCC | B.S. Murty, J. Yeh, S. Ranganathan, High Entropy Alloys, 1st edition, Butterworth-Heinemann, ISBN 9780128002513.                                                                                                                |
| AlCoCrFeNi                                                                  | BCC     | C. Li, J.C. Li, M. Zhao, Q. Jiang, Effect of alloying elements on microstructure and properties of multiprincipal elements high-entropy alloys, J. Alloy. Compd. 475 (2009) 752–757.                                            |
| Al <sub>1.5</sub> CoCrFeNi                                                  | BCC     |                                                                                                                                                                                                                                 |
| Al <sub>2</sub> CoCrFeNi                                                    | BCC     |                                                                                                                                                                                                                                 |
| Al <sub>2.5</sub> CoCrFeNi                                                  | BCC     |                                                                                                                                                                                                                                 |
| Al <sub>3</sub> CoCrFeNi                                                    | BCC     |                                                                                                                                                                                                                                 |
| CoCrCuFeNi                                                                  | FCC     |                                                                                                                                                                                                                                 |
| CrCuFeMnNi                                                                  | FCC+BCC |                                                                                                                                                                                                                                 |
| CrCuFeMoNi                                                                  | FCC     |                                                                                                                                                                                                                                 |
| AlCrCuFeNi                                                                  | FCC+BCC |                                                                                                                                                                                                                                 |
| AlCoCrFeNi                                                                  | BCC     | Y.P. Wang, B.S. Li, M.X. Ren, C. Yang, H.Z. Fu, Microstructure and compressive properties of AlCrFeCoNi high entropy alloy, Mater. Sci. Eng. A 491 (2008) 154–158.                                                              |
| AlCoCrFeMo <sub>0.1</sub> Ni                                                | BCC     | J.M. Zhu, H.M. Fu, H.F. Zhang, A.M. Wang, H. Li, Z.Q. Hua, Microstructures and compressive properties of multicomponent AlCoCrFeNiMox alloys, Mater. Sci. Eng. A 527 (2010) 6975–6979.                                          |
| AlCoCrFeNb <sub>0.1</sub> Ni                                                | BCC     | S.G. Ma, Y. Zhang, Effect of Nb addition on the microstructure and properties of AlCoCrFeNi high-entropy alloy, Mater. Sci. Eng. A 532 (2012) 480–486.                                                                          |
| AlCo <sub>2</sub> CrFeMo <sub>0.5</sub> Ni                                  | FCC+BCC | C.-Y. Hsu, W.-R. Wang, W.-Y. Tang, S.-K. Chen, J.-W. Yeh, Microstructure and mechanical properties of                                                                                                                           |
|                                                                             |         |                                                                                                                                                                                                                                 |

|                                                                 |         |                                                                                                                                                                                                                                                 |
|-----------------------------------------------------------------|---------|-------------------------------------------------------------------------------------------------------------------------------------------------------------------------------------------------------------------------------------------------|
|                                                                 |         | new AlCo <sub>x</sub> CrFeMo <sub>0.5</sub> Ni high-entropy alloys, Adv. Eng. Mater. 12 (2010) 44–49.                                                                                                                                           |
| AlCoCrFeMo <sub>0.5</sub> Ni <sub>1.5</sub>                     | FCC+BCC | C.-C. Juan, C.-Y. Hsu, C.-W. Tsai, W.-R. Wang, T.-S. Sheu, J.-W. Yeh, S.-K. Chen, On microstructure and mechanical performance of AlCoCrFeMo <sub>0.5</sub> Ni <sub>x</sub> highentropy alloys, Intermetallics 32 (2013) 401–407.               |
| AlCoCrFeMo <sub>0.5</sub> Ni <sub>2</sub>                       | FCC+BCC |                                                                                                                                                                                                                                                 |
| AlCoCrFeNiSi <sub>0.2</sub>                                     | BCC     | J.M. Zhu, H.M. Fu, H.F. Zhang, A.M. Wang, H. Li, Z.Q. Hu, Synthesis and properties of multiprincipal component AlCoCrFeNiSi <sub>x</sub> alloys, Mater. Sci. Eng. A 527 (2010) 7210–7214.                                                       |
| AlCoCrFeNiSi <sub>0.4</sub>                                     | BCC     |                                                                                                                                                                                                                                                 |
| AlCoCrFeNiSi <sub>0.6</sub>                                     | BCC     |                                                                                                                                                                                                                                                 |
| AlCoCrFeNiSi                                                    | BCC     |                                                                                                                                                                                                                                                 |
| AlCoCrFeNiTi <sub>0.5</sub>                                     | FCC     | F.J. Wang, Y. Zhang, G.L. Chen, Atomic packing efficiency and phase transition in a high entropy alloy, J. Alloy. Compd. 478 (2009) 321–324.                                                                                                    |
| CoCrCuFeNiTi <sub>0.5</sub>                                     | FCC     |                                                                                                                                                                                                                                                 |
| Al <sub>0.25</sub> CoCrCu <sub>0.5</sub> FeNiTi <sub>0.5</sub>  | FCC     |                                                                                                                                                                                                                                                 |
| Al <sub>0.25</sub> CoCrCu <sub>0.75</sub> FeNiTi <sub>0.5</sub> | FCC     |                                                                                                                                                                                                                                                 |
| Al <sub>0.5</sub> CoCrCu <sub>0.5</sub> FeNiTi <sub>0.5</sub>   | FCC+BCC |                                                                                                                                                                                                                                                 |
| Al <sub>0.75</sub> CoCrCu <sub>0.25</sub> FeNiTi <sub>0.5</sub> | FCC+BCC |                                                                                                                                                                                                                                                 |
| AlCoCrFeNiTi <sub>0.5</sub>                                     | BCC     | Y.J. Zhou, Y. Zhang, Y.L. Wang, G.L. Chen, Solid solution alloys of AlCoCrFeNiTi <sub>x</sub> with excellent room-temperature mechanical properties, Cit.: Appl. Phys. Lett. 90 (2007) 181904.                                                  |
| AlCoCrFeNiTi                                                    | BCC     |                                                                                                                                                                                                                                                 |
| AlCoFeNiTiVZr                                                   | BCC     | J.-W. Yeh, S.-K. Chen, S.-J. Lin, J.-Y. Gan, T.-S. Chin, T.-T. Shun, C.-H. Tsau, S.-Y. Chang, Nanostructured high-entropy alloys with multiple principal elements: novel alloy design concepts and outcomes, Adv. Eng. Mater. 6 (2004) 299–303. |
| CoCrFeMnNi                                                      | FCC     | J.Y. He, W.H. Liu, H. Wang, Y. Wu, X.J. Liu, T.G. Nieh, Z.P. Lu, Effects of Al addition on structural evolution and tensile properties of the FeCoNiCrMn high-entropy alloy system, Acta Mater. 62 (2014) 105–113.                              |
| Al <sub>0.10</sub> CoCrFeMnNi                                   | FCC     |                                                                                                                                                                                                                                                 |
| Al <sub>0.20</sub> CoCrFeMnNi                                   | FCC     |                                                                                                                                                                                                                                                 |
| Al <sub>0.38</sub> CoCrFeMnNi                                   | FCC     |                                                                                                                                                                                                                                                 |
| Al <sub>0.43</sub> CoCrFeMnNi                                   | FCC+BCC |                                                                                                                                                                                                                                                 |
| Al <sub>0.49</sub> CoCrFeMnNi                                   | FCC+BCC |                                                                                                                                                                                                                                                 |
| Al <sub>0.56</sub> CoCrFeMnNi                                   | FCC+BCC |                                                                                                                                                                                                                                                 |
| Al <sub>0.62</sub> CoCrFeMnNi                                   | FCC+BCC |                                                                                                                                                                                                                                                 |
| Al <sub>0.68</sub> CoCrFeMnNi                                   | FCC+BCC |                                                                                                                                                                                                                                                 |
| Al <sub>0.75</sub> CoCrFeMnNi                                   | FCC+BCC |                                                                                                                                                                                                                                                 |
| Al <sub>0.81</sub> CoCrFeMnNi                                   | FCC+BCC |                                                                                                                                                                                                                                                 |
| Al <sub>0.88</sub> CoCrFeMnNi                                   | FCC+BCC |                                                                                                                                                                                                                                                 |
| Al <sub>0.95</sub> CoCrFeMnNi                                   | FCC+BCC |                                                                                                                                                                                                                                                 |
| Al <sub>1.25</sub> CoCrFeMnNi                                   | BCC     |                                                                                                                                                                                                                                                 |
| CoCrFeMnNi                                                      | FCC     | N.D. Stepanov, D.G. Shaysultanov, G.A. Salishchev, M.A. Tikhonovsky, E.E. Oleynik, A.S. Tortika, O.N. Senkov, Effect of v content on microstructure and mechanical properties of the CoCrFeMnNiV <sub>x</sub> high entropy alloys, J. Alloy.    |
| CoCrFeMnNiV <sub>0.25</sub>                                     | FCC     |                                                                                                                                                                                                                                                 |
| CoCrFeMnNiV <sub>0.5</sub>                                      | FCC     |                                                                                                                                                                                                                                                 |



|                             |                |                                                                                                                                                                                               |
|-----------------------------|----------------|-----------------------------------------------------------------------------------------------------------------------------------------------------------------------------------------------|
|                             |                | <b>Compd. 628<br/>(2015) 170–185.</b>                                                                                                                                                         |
| <b>Al0.5CrFe1.5MnNi0.5</b>  | <b>BCC</b>     | <b>S.T. Chen, et al., Microstructure and properties of age-hardenable Al<sub>x</sub>Cr-Fe1.5MnNi0.5 alloys, Mater. Sci. Eng. A 527 (2010) 5818–5825.</b>                                      |
| <b>Al0.3CrFe1.5MnNi0.5</b>  | <b>FCC+BCC</b> |                                                                                                                                                                                               |
| <b>AlCrFeNi</b>             | <b>BCC</b>     | <b>Y. Dong, Y. Lu, J. Kong, J. Zhang, T. Li, Microstructure and mechanical properties of multi-component AlCrFeNiMox highentropy alloys, J. Alloy. Compd. 573 (2013) 96–101.</b>              |
| <b>AlCrFeNiMo0.2</b>        | <b>BCC</b>     |                                                                                                                                                                                               |
| <b>AlCrFeNiMo0.5</b>        | <b>BCC</b>     |                                                                                                                                                                                               |
| <b>Al0.3CoCrCuFe</b>        | <b>FCC</b>     | <b>Jien-Wei Yeh, Recent Progress in High-entropy Alloys, Ann. De. Chim. – Sci. Des. Mater. 31 (2006) 633–648.</b>                                                                             |
| <b>Al0.5CoCrCuFe</b>        | <b>FCC</b>     |                                                                                                                                                                                               |
| <b>Al0.8CoCrCuFe</b>        | <b>FCC+BCC</b> |                                                                                                                                                                                               |
| <b>AlCoCrCuFe</b>           | <b>FCC+BCC</b> |                                                                                                                                                                                               |
| <b>Al1.3CoCrCuFe</b>        | <b>FCC+BCC</b> |                                                                                                                                                                                               |
| <b>Al1.5CoCrCuFe</b>        | <b>FCC+BCC</b> |                                                                                                                                                                                               |
| <b>Al1.8CoCrCuFe</b>        | <b>FCC+BCC</b> |                                                                                                                                                                                               |
| <b>Al2.0CoCrCuFe</b>        | <b>FCC+BCC</b> |                                                                                                                                                                                               |
| <b>Al2.3CoCrCuFe</b>        | <b>FCC+BCC</b> |                                                                                                                                                                                               |
| <b>Al2.5CoCrCuFe</b>        | <b>FCC+BCC</b> |                                                                                                                                                                                               |
| <b>Al2.8CoCrCuFe</b>        | <b>BCC</b>     |                                                                                                                                                                                               |
| <b>Al3.0CoCrCuFe</b>        | <b>BCC</b>     |                                                                                                                                                                                               |
| <b>CoCrCu0.5FeNi</b>        | <b>FCC</b>     |                                                                                                                                                                                               |
| <b>CoCrCuFeNi</b>           | <b>FCC</b>     | <b>Chung-Jin Tong, et al., Microstructure characterization of Al<sub>x</sub>CoCrCuFeNi high-entropy alloy system with multiprincipal elements, Metall. Mater. Trans. A 36 (2005) 881.</b>     |
| <b>Al0.3CoCrCuFeNi</b>      | <b>FCC</b>     |                                                                                                                                                                                               |
| <b>Al0.5CoCrCuFeNi</b>      | <b>FCC</b>     |                                                                                                                                                                                               |
| <b>Al0.8CoCrCuFeNi</b>      | <b>FCC</b>     |                                                                                                                                                                                               |
| <b>AlCoCrCuFeNi</b>         | <b>FCC+BCC</b> |                                                                                                                                                                                               |
| <b>Al1.3CoCrCuFeNi</b>      | <b>FCC+BCC</b> |                                                                                                                                                                                               |
| <b>Al1.5CoCrCuFeNi</b>      | <b>FCC+BCC</b> |                                                                                                                                                                                               |
| <b>Al1.8CoCrCuFeNi</b>      | <b>FCC+BCC</b> |                                                                                                                                                                                               |
| <b>Al2CoCrCuFeNi</b>        | <b>FCC+BCC</b> |                                                                                                                                                                                               |
| <b>Al2.3CoCrCuFeNi</b>      | <b>FCC+BCC</b> |                                                                                                                                                                                               |
| <b>Al2.5CoCrCuFeNi</b>      | <b>FCC+BCC</b> |                                                                                                                                                                                               |
| <b>Al2.8CoCrCuFeNi</b>      | <b>BCC</b>     |                                                                                                                                                                                               |
| <b>CoCrCuFeNiTi0.5</b>      | <b>FCC</b>     | <b>X.F. Wang, Y. Zhang, Y. Qiao, G.L. Chen, Novel microstructure and properties of multicomponent CoCrCuFeNiTi<sub>x</sub> alloys, Intermetallics 15 (2007) 357–362.</b>                      |
| <b>CoCrCuFeNiTi</b>         | <b>FCC</b>     |                                                                                                                                                                                               |
| <b>Al0.5CoCrCuFeNi</b>      | <b>FCC</b>     | <b>M.-R. Chen, S.-J. Lin, J.-W. Yeh, S.-K. Chen, Y.-S. Huang, C.-P. Tu, Microstructure and properties of Al0.5CoCrCuFeNiTi<sub>x</sub> (x = 0, 2.0) high-entropy alloys, Mater. Trans. 47</b> |
| <b>Al0.5CoCrCuFeNiTi0.2</b> | <b>FCC</b>     |                                                                                                                                                                                               |
| <b>Al0.5CoCrCuFeNiTi0.4</b> | <b>FCC</b>     |                                                                                                                                                                                               |

|                                               |         |                                                                                                                                                                                                                                                       |
|-----------------------------------------------|---------|-------------------------------------------------------------------------------------------------------------------------------------------------------------------------------------------------------------------------------------------------------|
| Al <sub>0.5</sub> CoCrCuFeNiTi <sub>0.6</sub> | FCC+BCC | (2006) 1395–1401.                                                                                                                                                                                                                                     |
| Al <sub>0.5</sub> CoCrCuFeNiTi <sub>0.8</sub> | FCC+BCC |                                                                                                                                                                                                                                                       |
| Al <sub>0.5</sub> CoCrCuFeNiTi                | FCC+BCC |                                                                                                                                                                                                                                                       |
| Al <sub>0.5</sub> CoCrCuFeNiTi <sub>1.2</sub> | FCC+BCC |                                                                                                                                                                                                                                                       |
| Al <sub>0.5</sub> CoCrCuFeNiTi <sub>1.4</sub> | FCC+BCC |                                                                                                                                                                                                                                                       |
| Al <sub>0.5</sub> CoCrCuFeNiTi <sub>1.6</sub> | FCC+BCC |                                                                                                                                                                                                                                                       |
| Al <sub>0.5</sub> CoCrCuFeNiTi <sub>1.8</sub> | FCC+BCC |                                                                                                                                                                                                                                                       |
| Al <sub>0.5</sub> CoCrCuFeNiTi <sub>2</sub>   | FCC+BCC |                                                                                                                                                                                                                                                       |
| Al <sub>0.5</sub> CoCrCuFeNi                  | FCC     | M.R. Chen, S.J. Lin, J.W. Yeh, S.K. Chen, Y.S. Huang, M.H. Chuang, Effect of vanadium addition on the microstructure, hardness, and wear resistance of Al <sub>0.5</sub> CoCrCuFeNi high-entropy alloy, Metall. Mater. Trans. A 37A (2006) 1363–1369. |
| Al <sub>0.5</sub> CoCrCuFeNiV <sub>0.2</sub>  | FCC     |                                                                                                                                                                                                                                                       |
| Al <sub>0.5</sub> CoCrCuFeNiV <sub>0.4</sub>  | FCC+BCC |                                                                                                                                                                                                                                                       |
| Al <sub>0.5</sub> CoCrCuFeNiV <sub>0.6</sub>  | FCC+BCC |                                                                                                                                                                                                                                                       |
| Al <sub>0.5</sub> CoCrCuFeNiV <sub>0.8</sub>  | FCC+BCC |                                                                                                                                                                                                                                                       |
| Al <sub>0.5</sub> CoCrCuFeNiV <sub>1.0</sub>  | FCC+BCC |                                                                                                                                                                                                                                                       |
| Al <sub>0.5</sub> CoCrCuFeNiV <sub>1.2</sub>  | BCC     |                                                                                                                                                                                                                                                       |
| Al <sub>0.5</sub> CoCrCuFeNiV <sub>1.4</sub>  | BCC     |                                                                                                                                                                                                                                                       |
| Al <sub>0.5</sub> CoCrCuFeNiV <sub>1.6</sub>  | BCC     |                                                                                                                                                                                                                                                       |
| Al <sub>0.5</sub> CoCrCuFeNiV <sub>1.8</sub>  | BCC     |                                                                                                                                                                                                                                                       |
| Al <sub>0.5</sub> CoCrCuFeNiV <sub>2.0</sub>  | BCC     |                                                                                                                                                                                                                                                       |
| AlCoCrCuFeNi                                  | FCC+BCC | Y.X. Zhuang, W.J. Liu, Z.Y. Chen, H.D. Xue, J.C. He, Effect of elemental interaction on microstructure and mechanical properties of FeCoNiCuAl alloys, Mater. Sci. Eng. A 556 (2012) 395–399.                                                         |
| AlCoCuFeNi                                    | FCC+BCC |                                                                                                                                                                                                                                                       |
| AlCoCuFeNiSi                                  | FCC+BCC |                                                                                                                                                                                                                                                       |
| AlCoCuFeNiTi                                  | FCC+BCC |                                                                                                                                                                                                                                                       |
| AlCoCuFeNiZr                                  | FCC+BCC |                                                                                                                                                                                                                                                       |
| AlCoCrCuFeNi                                  | FCC+BCC | B.S. Li, Y.P. Wang, M.X. Ren, C. Yang, H.Z. Fu, Effects of Mn, Ti and V on the microstructure and properties of AlCrFeCoNiCu high entropy alloy, Mater. Sci. Eng. A 498 (2008) 482–489.                                                               |
| AlCoCrCuFeMnNi                                | FCC+BCC |                                                                                                                                                                                                                                                       |
| AlCoCrCuFeNiTi                                | FCC+BCC |                                                                                                                                                                                                                                                       |
| AlCoCrCuFeNiV                                 | FCC+BCC |                                                                                                                                                                                                                                                       |
| Al <sub>3</sub> CoCrCuFeNi                    | BCC     | J.-W. Yeh, Recent progress in high-entropy alloys, Ann. Chim. Sci. Mater. 31 (2006) 633–648.                                                                                                                                                          |
| AlCoCrCuNiTi                                  | BCC     | Z. Hu, Y. Zhan, G. Zhang, J. She, C. Li, Effect of rare earth Y addition on the microstructure and mechanical properties of high entropy AlCoCrCuNiTi alloys, Mater. Des. 31 (2010) 1599–1605.                                                        |
| CoCuFeNi                                      | FCC     | L. Liu, J.B. Zhu, C. Zhang, J.C. Li, Q. Jiang, Microstructure and the properties of FeCoCuNiSnx high entropy alloys, Mater. Sci. Eng. A 548 (2012) 64–68.                                                                                             |
| CoCuFeNiSn <sub>0.02</sub>                    | FCC     |                                                                                                                                                                                                                                                       |
| CoCuFeMnNi                                    | FCC     | L. Liu, J.B. Zhu, L. Li, J.C. Li, Q. Jiang, Microstructure and tensile properties of FeMnNiCuCoSnx high entropy alloys, Mater. Des. 44 (2013) 223–227.                                                                                                |
| CoCuFeMnNiSn <sub>0.03</sub>                  | FCC     |                                                                                                                                                                                                                                                       |
| CoCrCuFeNi                                    | FCC     | P. Jinhong, P. Ye, Z. Hui, Z. Lu, Microstructure and                                                                                                                                                                                                  |

|                            |         |                                                                                                                                                                                                                                                                                                                                                                          |
|----------------------------|---------|--------------------------------------------------------------------------------------------------------------------------------------------------------------------------------------------------------------------------------------------------------------------------------------------------------------------------------------------------------------------------|
| AlCrCuFeNi0.6              | FCC+BCC | properties of AlCrFeCuNix (0.6 <sup>1</sup> / <sub>4</sub> <sup>1</sup> / <sub>4</sub> 1.4) high-entropy alloys, Mater. Sci. Eng. A 534 (2012) 228–233.                                                                                                                                                                                                                  |
| AlCrCuFeNi0.8              | FCC+BCC |                                                                                                                                                                                                                                                                                                                                                                          |
| AlCrCuFeNi                 | FCC+BCC |                                                                                                                                                                                                                                                                                                                                                                          |
| AlCrCuFeNi1.2              | FCC+BCC |                                                                                                                                                                                                                                                                                                                                                                          |
| AlCrCuFeNi1.4              | FCC+BCC |                                                                                                                                                                                                                                                                                                                                                                          |
| AlCrCuFeNi2                | FCC+BCC | S. Guo, C. Ng, J. Lu, C.T. Liu, Effect of valence electron concentration on stability of FCC or BCC phase in high entropy alloys, J. Appl. Phys. 109 (2011) 103505.                                                                                                                                                                                                      |
| Al0.2CrCuFeNi2             | FCC     |                                                                                                                                                                                                                                                                                                                                                                          |
| Al0.4CrCuFeNi2             | FCC     |                                                                                                                                                                                                                                                                                                                                                                          |
| Al0.6CrCuFeNi2             | FCC     |                                                                                                                                                                                                                                                                                                                                                                          |
| Al0.8CrCuFeNi2             | FCC     |                                                                                                                                                                                                                                                                                                                                                                          |
| Al1.2CrCuFeNi2             | FCC+BCC | E. Fazakas, V. Zadorozhnyy, D.V. Louzguine-Luzgin, Effect of iron content on the structure and mechanical properties of Al <sub>25</sub> Ti <sub>25</sub> Ni <sub>25</sub> Cu <sub>25</sub> and (AlTi) <sub>60-x</sub> Ni <sub>20</sub> Cu <sub>20</sub> Fe <sub>x</sub> (x <sup>1</sup> / <sub>15</sub> , 20) high-entropy alloys, Appl. Surf. Sci. 358 (2015) 549–555. |
| Al1.125CuFe0.75NiTi1.125   | FCC     |                                                                                                                                                                                                                                                                                                                                                                          |
| AlCuFeNiTi                 | FCC     |                                                                                                                                                                                                                                                                                                                                                                          |
| AlCuNiTi                   | FCC     | N.D. Stepanov, N. Yu Yurchenko, D.V. Skibin, M.A. Tikhonovsky, G.A. Salishchev, Structure and mechanical properties of the AlCr <sub>x</sub> NbTiV (x <sup>1</sup> / <sub>4</sub> 0, 0.5, 1, 1.5) high entropy alloys, J. Alloy. Compd. 652 (2015) 266–280.                                                                                                              |
| AlCr0.5NbTiV               | BCC     |                                                                                                                                                                                                                                                                                                                                                                          |
| AlNbTiV                    | BCC     | O.N. Senkov, C. Woodward, D.B. Miracle, Microstructure and properties of aluminum-containing refractory high entropy alloys, JOM 66 (10) (2014) 2030–2042.                                                                                                                                                                                                               |
| Al0.4Hf0.6NbTaTiZr         | BCC     |                                                                                                                                                                                                                                                                                                                                                                          |
| AlMo0.5NbTa0.5TiZr         | BCC     |                                                                                                                                                                                                                                                                                                                                                                          |
| Al0.3NbTa0.8Ti1.4V0.2Zr1.3 | BCC     |                                                                                                                                                                                                                                                                                                                                                                          |
| Al0.5NbTa0.8Ti1.5V0.2Zr    | BCC     |                                                                                                                                                                                                                                                                                                                                                                          |
| Al0.3NbTaTi1.4Zr1.3        | BCC     |                                                                                                                                                                                                                                                                                                                                                                          |
| AlNb1.5Ta0.5Ti1.5Zr0.5     | BCC     | C.-M. Lin, C.-C. Juan, C.-H. Chang, C.-W. Tsai, J.-W. Yeh, Effect of Al addition on mechanical properties and microstructure of refractory Al <sub>x</sub> HfNbTaTiZr alloys, J. Alloy. Compd. 624 (2015) 100–107.                                                                                                                                                       |
| Al0.3HfNbTaTiZr            | BCC     |                                                                                                                                                                                                                                                                                                                                                                          |
| Al0.5HfNbTaTiZr            | BCC     |                                                                                                                                                                                                                                                                                                                                                                          |
| Al0.75HfNbTaTiZr           | BCC     |                                                                                                                                                                                                                                                                                                                                                                          |
| HfNbTaTiZr                 | BCC     | S.Y. Chen, X. Yang, K.A. Dahmen, P.K. Liaw, Y. Zhang, Microstructures and crackling noise of Al <sub>x</sub> NbTiMoV high entropy alloys, Entropy 16 (2014) 870–884.                                                                                                                                                                                                     |
| Al0.25MoNbTiV              | BCC     |                                                                                                                                                                                                                                                                                                                                                                          |
| Al0.5MoNbTiV               | BCC     |                                                                                                                                                                                                                                                                                                                                                                          |
| Al0.75MoNbTiV              | BCC     |                                                                                                                                                                                                                                                                                                                                                                          |
| AlMoNbTiV                  | BCC     |                                                                                                                                                                                                                                                                                                                                                                          |
| MoNbTiV                    | BCC     | X. Yang, Y. Zhang, P.K. Liaw, Microstructure and compressive properties of NbTiVTaAl <sub>x</sub> high entropy alloys, Procedia Eng. 36 (2012) 292–298.                                                                                                                                                                                                                  |
| Al0.25NbTaTiV              | BCC     |                                                                                                                                                                                                                                                                                                                                                                          |
| Al0.5NbTaTiV               | BCC     |                                                                                                                                                                                                                                                                                                                                                                          |
| AlNbTaTiV                  | BCC     |                                                                                                                                                                                                                                                                                                                                                                          |
| NbTaTiV                    | BCC     | N.D. Stepanov, D.G. Shaysultanov, G.A. Salishchev, M.A. Tikhonovsky, Structure and mechanical properties of a lightweight AlNbTiV high entropy alloy, Mater. Lett. 142 (2015) 153–155.                                                                                                                                                                                   |
| AlNbTiV                    | BCC     |                                                                                                                                                                                                                                                                                                                                                                          |

|                        |     |                                                                                                                                                                                                                                         |
|------------------------|-----|-----------------------------------------------------------------------------------------------------------------------------------------------------------------------------------------------------------------------------------------|
| NbTiVZr                | BCC | O.N. Senkov, V. Senkova, D.B. Miracle, C. Woodward, Mechanical properties of low-density, refractory multi-principal element alloys of the Cr-Nb-Ti-V-Zr system, Mater. Sci. Eng. A 565 (2013) 51–62.                                   |
| NbTiV2Zr               | BCC |                                                                                                                                                                                                                                         |
| HfMo0.25NbTaTiZr       | BCC | C.-C. Juan, K.-K. Tseng, W.-L. Hsu, M.-H. Tsai, C.-W. Tsai, C.-M. Lin, S.-K. Chen, S.-J. Lin, J.-W. Yeh, Solution strengthening of ductile refractory HfMoxNbTaTiZr high-entropy alloys, Mater. Lett. 175 (2016) 284–287.               |
| HfMo0.5NbTaTiZr        | BCC |                                                                                                                                                                                                                                         |
| HfMo0.75NbTaTiZr       | BCC |                                                                                                                                                                                                                                         |
| HfMoNbTaTiZr           | BCC |                                                                                                                                                                                                                                         |
| HfNbTaTiZr             | BCC |                                                                                                                                                                                                                                         |
| HfMoNbTaTiZr           | BCC | C.-C. Juan, M.-H. Tsai, C.-W. Tsai, C.-M. Lin, W.-R. Wang, C.-C. Yang, S.-K. Chen, S.-J. Lin, J.-W. Yeh, Enhanced mechanical properties of HfMoTaTiZr and HfMoNbTaTiZr refractory high-entropy alloys, Intermetallics. 62 (2015) 76–83. |
| HfMoTaTiZr             | BCC |                                                                                                                                                                                                                                         |
| HfMoNbZrTi             | BCC | N.N. Guo, L. Wang, L.S. Luo, X.Z. Li, Y.Q. Su, J.J. Guo, H.Z. Fu, Microstructure and mechanical properties of refractory MoNbHfZrTi high-entropy alloy, Mater. Des. 81 (2015) 87–94.                                                    |
| HfNbTaZr               | BCC | S. Maiti, W. Steurer, Structural-disorder and its effect on mechanical properties in single-phase TaNbHfZr high-entropy alloy, Acta Mater. 106 (2016) 87–97.                                                                            |
| Hf0.5Nb0.5Ta0.5Ti1.5Zr | BCC | S. Sheikh, S. Shafeie, Q. Hu, J. Ahlstrom, C. Persson, J. Vesely, J. Zyka, U. Klement, S. Guo, Alloy design for intrinsically ductile refractory high-entropy alloys, J. Appl. Phys. 120 (2016) 164902.                                 |
| Mo0.3NbTiVZr           | BCC | Y.D. Wu, Y.H. Cai, X.H. Chen, T. Wang, J.J. Si, L. Wang, Y.D. Wang, X.D. Hui, Phase composition and solid solution strengthening effect in TiZrNbMoV high-entropy alloys, Mater. Des. 83 (2015) 651–660.                                |
| Mo0.5NbTiVZr           | BCC |                                                                                                                                                                                                                                         |
| Mo0.7NbTiVZr           | BCC |                                                                                                                                                                                                                                         |
| MoNbTiVZr              | BCC |                                                                                                                                                                                                                                         |
| Mo1.3NbTiVZr           | BCC |                                                                                                                                                                                                                                         |
| Mo1.5NbTiVZr           | BCC |                                                                                                                                                                                                                                         |
| Mo1.7NbTiVZr           | BCC |                                                                                                                                                                                                                                         |
| Mo2NbTiVZr             | BCC |                                                                                                                                                                                                                                         |
| NbTiV0.3Zr             | BCC |                                                                                                                                                                                                                                         |
| NbTiV0.3Mo0.1          | BCC |                                                                                                                                                                                                                                         |
| NbTiV0.3Mo0.3          | BCC |                                                                                                                                                                                                                                         |
| NbTiV0.3Mo0.5          | BCC |                                                                                                                                                                                                                                         |
| NbTiV0.3Mo0.7          | BCC |                                                                                                                                                                                                                                         |
| NbTiV0.3Mo             | BCC |                                                                                                                                                                                                                                         |
| NbTiV0.3Mo1.3          | BCC |                                                                                                                                                                                                                                         |
| NbTiV0.3Mo1.5          | BCC |                                                                                                                                                                                                                                         |
| NbTiVZr                | BCC |                                                                                                                                                                                                                                         |

|                 |         |                                                                                                                                                                                                                                                     |
|-----------------|---------|-----------------------------------------------------------------------------------------------------------------------------------------------------------------------------------------------------------------------------------------------------|
| MoNbTiV0.25Zr   | BCC     | Y. Zhang, X. Yang, P.K. Liaw, Alloy design and properties optimization of high entropy alloys, JOM 64 (7) (2012) 830–838.                                                                                                                           |
| MoNbTiV0.50Zr   | BCC     |                                                                                                                                                                                                                                                     |
| MoNbTiV0.75Zr   | BCC     |                                                                                                                                                                                                                                                     |
| MoNbTiV1.0Zr    | BCC     |                                                                                                                                                                                                                                                     |
| MoNbTiV1.5Zr    | BCC     |                                                                                                                                                                                                                                                     |
| MoNbTiV2.0Zr    | BCC     |                                                                                                                                                                                                                                                     |
| MoNbTiV3.0Zr    | BCC     |                                                                                                                                                                                                                                                     |
| MoNbTiZr        | BCC     |                                                                                                                                                                                                                                                     |
| NbTaVW          | BCC     | H.W. Yao, J.W. Qiao, M.C. Gao, J.A. Hawk, S.G. Ma, H.F. Zhou, Y. Zhang, NbTaV-(Ti,W) refractory high-entropy alloys: experiments and modeling, Mater. Sci. Eng. A-Struct. Mater. Prop. Microstruct. Process. 674 (2016) 203–211.                    |
| CoFeNiV         | FCC     | L. Jiang, Z.Q. Cao, J.C. Jie, J.J. Zhang, Y.P. Lu, T.M. Wang, T.J. Li, Effect of Mo and Ni elements on microstructure evolution and mechanical properties of the CoFeNi <sub>x</sub> VMoy high entropy alloys, J. Alloy. Compd. 649 (2015) 585–590. |
| CoCrFeNiAl      | BCC     | Y.J. Zhou, Y. Zhang, Y.L. Wang, G.L. Chen, Appl. Phys. Lett. 90 (2007) 181904.                                                                                                                                                                      |
| CoCrFeNiCu      | FCC     | J.W. Yeh, S.K. Chen, S.J. Lin, J.Y. Gan, T.S. Chin, T.T. Shun, C.H. Tsau, S.Y. Chang, Adv. Eng. Mater. 6 (2004) 299–303.                                                                                                                            |
| CoCrFeNiCuAl0.3 | FCC     |                                                                                                                                                                                                                                                     |
| CoCrFeNiCuAl0.5 | FCC     |                                                                                                                                                                                                                                                     |
| CoCrFeNiCuAl0.8 | FCC+BCC |                                                                                                                                                                                                                                                     |
| CoCrFeNiCuAl    | FCC+BCC |                                                                                                                                                                                                                                                     |
| CoCrFeNiCuAl1.3 | FCC+BCC |                                                                                                                                                                                                                                                     |
| CoCrFeNiCuAl1.5 | FCC+BCC |                                                                                                                                                                                                                                                     |
| CoCrFeNiCuAl1.8 | FCC+BCC |                                                                                                                                                                                                                                                     |
| CoCrFeNiCuAl2   | FCC+BCC |                                                                                                                                                                                                                                                     |
| CoCrFeNiCuAl2.3 | BCC     |                                                                                                                                                                                                                                                     |
| CoCrFeNiCuAl2.5 | BCC     |                                                                                                                                                                                                                                                     |
| CoCrFeNiCuAl2.8 | BCC     |                                                                                                                                                                                                                                                     |
| CoCrFeNiCuAl3   | BCC     |                                                                                                                                                                                                                                                     |
| CoCrFeNiCuAlSi  | FCC+BCC | J.W. Yeh, S.Y. Chang, Y.D. Hong, S.K. Chen, S.J. Lin, Mater. Chem. Phys. 103 (2007) 41–46.                                                                                                                                                          |
| CoCrNiCuAl      | FCC+BCC |                                                                                                                                                                                                                                                     |
| CoCuNiAl        | FCC+BCC |                                                                                                                                                                                                                                                     |
| CuNiAl          | FCC+BCC |                                                                                                                                                                                                                                                     |
| MnCrFeNiCuAl    | BCC     | H.Y. Chen, C.W. Tsai, C.C. Tung, J.W. Yeh, T.T. Shun, C.C. Yang, S.K. Chen, Ann. Chim. Sci. Mater. 31 (2006) 685–698.                                                                                                                               |
| FeCoNiCrMn      | FCC     | B. Cantor, I.T.H. Chang, P. Knight, A.J.B. Vincent, Mater. Sci. Eng., A 375–377 (2004) 213–218.                                                                                                                                                     |
| CoCrFeNiMnCu    | FCC     |                                                                                                                                                                                                                                                     |

|                           |         |                                                                                                                                                                                                                                                          |
|---------------------------|---------|----------------------------------------------------------------------------------------------------------------------------------------------------------------------------------------------------------------------------------------------------------|
| CoCrNiCu0.5Al             | BCC     | J.W. Yeh, S.J. Lin, T.S. Chin, J.Y. Gan, S.K. Chen, T.T. Shun, C.H. Tsau, S.Y. Chou, Metall. Mater. Trans. A 35 (2004) 2533–2536.                                                                                                                        |
| TiCoCrFeNiCuAlV           | FCC+BCC |                                                                                                                                                                                                                                                          |
| Co0.5CrFeNiCuAl           | FCC+BCC | C.C. Tung, J.W. Yeh, T.T. Shun, S.K. Chen, Y.S. Huang, H.C. Chen, Mater. Lett. 61 (2007) 1–5.                                                                                                                                                            |
| CoCr0.5FeNiCuAl           | FCC+BCC |                                                                                                                                                                                                                                                          |
| CoCrFe0.5NiCuAl           | FCC+BCC |                                                                                                                                                                                                                                                          |
| CoCrFeNi0.5CuAl           | FCC+BCC |                                                                                                                                                                                                                                                          |
| CoCrFeNiCu0.5Al           | BCC     |                                                                                                                                                                                                                                                          |
| Cu0.5NiCoCrAl0.5Fe2       | FCC     | Ke, G.-Y., Chen, G.-Y., Hsu, T. & Yeh, J.-W. FCC and BCC equivalents in as-cast solid solutions of Al <sub>x</sub> Co <sub>y</sub> Cr <sub>z</sub> Cu <sub>0.5</sub> Fe <sub>v</sub> Ni <sub>w</sub> high-entropy alloys. Ann. Chim. 31, 669–683 (2006). |
| TiCr0.5FeNiCuAl           | FCC+BCC | M. Chen, Y. Liu, Y.X. Li, X. Chen, Acta Metall. Sin. 43 (2007) 1020–1024                                                                                                                                                                                 |
| TiCrFeNiCuAl              | FCC+BCC |                                                                                                                                                                                                                                                          |
| TiCr1.5FeNiCuAl           | FCC+BCC |                                                                                                                                                                                                                                                          |
| TiCr2FeNiCuAl             | FCC+BCC |                                                                                                                                                                                                                                                          |
| TiCr3FeNiCuAl             | FCC+BCC |                                                                                                                                                                                                                                                          |
| CoCrFeNiCuAlV             | FCC+BCC | B.S. Li, Y.R. Wang, M.X. Ren, C. Yang, H.Z. Fu, Mater. Sci. Eng. A 498 (2008) 482–486.                                                                                                                                                                   |
| Ti0.5Co1.5CrFeNiAl        | FCC+BCC | F.J. Wang, Y. Zhang, Mater. Sci. Eng. A 496 (2008) 214–216.                                                                                                                                                                                              |
| Ti0.5Co2CrFeNiAl          | FCC+BCC |                                                                                                                                                                                                                                                          |
| Ti0.5Co3CrFeNiAl          | FCC+BCC |                                                                                                                                                                                                                                                          |
| Ti0.5CoCrFeNiCu0.75Al0.25 | FCC     | F.J. Wang, Y. Zhang, G.L. Chen, J. Alloys Compd. 478 (2009) 321–324.                                                                                                                                                                                     |
| Ti0.5CoCeFeNiCu0.5Al0.5   | FCC+BCC |                                                                                                                                                                                                                                                          |
| CoCrFeNiCu0.25Al          | BCC     | Y. Zhang, Y.J. Zhou, J.P. Lin, G.L. Chen, P.K. Liaw, Adv. Eng. Mater. 10 (2008) 534–538.                                                                                                                                                                 |
| CoFeNiCuV                 | FCC     |                                                                                                                                                                                                                                                          |
| CoCrFeNiCu0.75Al0.25      | FCC     | Y.J. Zhou, Y. Zhang, F.J. Wang, G.L. Chen, Appl. Phys. Lett. 92 (2008) 241917                                                                                                                                                                            |
| CoCrFeNiCu0.5Al0.5        | FCC     |                                                                                                                                                                                                                                                          |
| CoCrFeNiCu0.25Al0.75      | FCC+BCC |                                                                                                                                                                                                                                                          |
| CoCrFeNiAl0.25            | FCC     | H.P. Chou, Y.S. Chang, S.K. Chen, J.W. Yeh, Mater. Sci. Eng., B 163 (2009) 184–189                                                                                                                                                                       |
| CoCrFeNiAl0.375           | FCC     |                                                                                                                                                                                                                                                          |
| CoCrFeNiAl0.5             | FCC+BCC |                                                                                                                                                                                                                                                          |
| CoCrFeNiAl0.75            | FCC+BCC |                                                                                                                                                                                                                                                          |
| CoCrFeNiAl0.875           | FCC+BCC |                                                                                                                                                                                                                                                          |
| CoCrFeNiAl1.25            | BCC     |                                                                                                                                                                                                                                                          |
| CoCrFeNiAl1.5             | BCC     |                                                                                                                                                                                                                                                          |
| CoCrFeNiAl2               | BCC     |                                                                                                                                                                                                                                                          |
| CoCrFeNiAl2.5             | BCC     |                                                                                                                                                                                                                                                          |
| CoCrFeNiAl3               | BCC     |                                                                                                                                                                                                                                                          |
| MoCrFeNiCu                | FCC     | C. Li, J.C. Li, M. Zhao, Q. Jiang, J. Alloys Compd. 475 (2009) 752–757.                                                                                                                                                                                  |

|                            |         |                                                                                                                                                              |
|----------------------------|---------|--------------------------------------------------------------------------------------------------------------------------------------------------------------|
| MnCrFeNiCu                 | FCC+BCC |                                                                                                                                                              |
| MnCrFe1.5Ni0.5Al0.3        | BCC     | K.C. Hsieh, C.F. Yu, W.T. Hsieh, W.R. Chiang, J.S. Ku, J.H. Lai, C.P. Tu, C.C. Yang, J. Alloys Compd. 483 (2009) 209–212.                                    |
| MnCrFe1.5Ni0.5Al0.5        | BCC     |                                                                                                                                                              |
| Ti0.5Co1.5CrFeNi1.5        | FCC     | Y.L. Chou, J.W. Yeh, H.C. Shih, Corros. Sci. 52 (2010) 2571–2581.                                                                                            |
| Ti0.5Co1.5CrFeNi1.5Mo0.1   | FCC     |                                                                                                                                                              |
| CoCrFeNiCuAl0.5V0.2        | FCC     | M.R. Chen, S.J. Lin, J.W. Yeh, M.H. Chuang, S.K. Chen, Y.S. Huang, Metall. Mater. Trans. A 37 (2006) 1363–1369.                                              |
| CoCrFeNiCuAl0.5V0.4        | FCC+BCC |                                                                                                                                                              |
| CoCrFeNiCuAl0.5V1.2        | FCC+BCC |                                                                                                                                                              |
| CoCrFeNiCuAl0.5V1.4        | FCC+BCC |                                                                                                                                                              |
| CoCrFeNiCuAl0.5V1.6        | FCC+BCC |                                                                                                                                                              |
| CoCrFeNiCuAl0.5V1.8        | FCC+BCC |                                                                                                                                                              |
| CoCrFeNiCuAl0.5V2          | FCC+BCC |                                                                                                                                                              |
| Mn2CrFeNi2Cu               | FCC     |                                                                                                                                                              |
| MnCr2Fe2NiCu               | FCC+BCC |                                                                                                                                                              |
| Mn2Cr2Fe2Ni2Cu             | FCC     |                                                                                                                                                              |
| Mn2CrFe2NiCu2              | FCC+BCC |                                                                                                                                                              |
| MnCrFe2Ni2Cu2              | FCC     |                                                                                                                                                              |
| Mn2Cr2Fe2Ni2Cu2            | FCC+BCC |                                                                                                                                                              |
| MnCr2Fe2Ni2Cu2             | FCC+BCC |                                                                                                                                                              |
| W27.3Nb22.7Mo25.6Ta24.4    | BCC     | O.N. Senkov, G.B. Wilks, D.B. Miracle, C.P. Chuang, P.K. Liaw, Intermetallics 18 (2010) 1758–1765.                                                           |
| W21.1Nb20.6Mo21.7Ta15.6V21 | BCC     |                                                                                                                                                              |
| CoCrFeNiMo0.3              | FCC     | T.T. Shun, C.H. Hung, C.F. Lee, J. Alloys Compd. 493 (2010) 105–109                                                                                          |
| CoCrFeNiAl0.3Mo0.1         | FCC     |                                                                                                                                                              |
| CoCrFeNiCuAlMo0.2          | FCC+BCC | J.M. Zhu, H.F. Zhang, H.M. Fu, A.M. Wang, H. Li, Z.Q. Hu, J. Alloys Compd. 497 (2010) 52–56.                                                                 |
| Al0.25CrCuFeNi2            | FCC     | Zhang Y, Lu ZP, Ma SG, Liaw PK, Tang Z, Cheng YQ, Gao MC (2014) Guidelines in predicting phase formation of high-entropy alloys. MRS Commun 4(2):57–62.      |
| Al0.5CrCuFeNi2             | FCC     |                                                                                                                                                              |
| Al2.0CrCuFeNi2             | BCC     |                                                                                                                                                              |
| AlCoCrFeNiNb0.1            | BCC     | Ma SG, Zhang Y (2012) Effect of Nb addition on the microstructure and properties of AlCoCrFeNi high-entropy alloy. Mater Sci Eng A 532:480–486.              |
| Al1.5CoCrFeNiTi            | BCC     | Zhang KB, Fu ZY (2012) Effects of annealing treatment on phase composition and microstructure of CoCrFeNiTiAlx high-entropy alloys. Intermetallics 22:24–32. |
| Al2CoCrFeNiTi              | BCC     |                                                                                                                                                              |

|                                                                             |            |                                                                                                                                                                                                                  |
|-----------------------------------------------------------------------------|------------|------------------------------------------------------------------------------------------------------------------------------------------------------------------------------------------------------------------|
| <b>Al<sub>0.2</sub>Co<sub>1.5</sub>CrFeNi<sub>1.5</sub>Ti<sub>0.5</sub></b> | <b>FCC</b> | <b>Chuang MH, Tsai MH, Wang WR, Lin SJ, Yeh JW (2011) Microstructure and wear behavior of Al<sub>x</sub>Co<sub>1.5</sub>CrFeNi<sub>1.5</sub>Ti<sub>y</sub> high-entropy alloys. Acta Mater 59(16):6308–6317.</b> |
| <b>CoCrFeNiPd</b>                                                           | <b>FCC</b> | <b>Lucas MS, Mauger L, Munoz JA, Xiao YM, Sheets AO, Semiatin SL, Horwath J, Turgut Z (2011) Magnetic and vibrational properties of high-entropy alloys. J Appl Phys 109 (7):07E307.</b>                         |
| <b>CoCrFeNiPd<sub>2</sub></b>                                               | <b>FCC</b> |                                                                                                                                                                                                                  |
| <b>AlCoCrFeNiSi<sub>0.6</sub></b>                                           | <b>BCC</b> | <b>Zhu JM, Fu HM, Zhang HF, Wang AM, Li H, Hu ZQ (2010) Synthesis and properties of multiprincipal component AlCoCrFeNiSix alloys. Mater Sci Eng A 527(27–28):7210–7214</b>                                      |
| <b>AlCoCrFeNiSi<sub>0.4</sub></b>                                           | <b>BCC</b> |                                                                                                                                                                                                                  |
| <b>AlCoCrFeNiSi<sub>0.2</sub></b>                                           | <b>BCC</b> |                                                                                                                                                                                                                  |



**Data S2. The data set used in the current work (separate file)**

The data set used in our machine learning model contains 266 MPEAs consisting of 103 BCC, 61 FCC, and 102 BCC + FCC phases. Meanwhile, the values of 12 physical features of each MPEA are calculated.

| Alloys                    | Phase   | Diff_S | Diff_H  | Tm       | Omega | Diff_X | Diff_D | VE C  | Gamma | Density | Young's Modulus | Bulk Modulus | Lamda |
|---------------------------|---------|--------|---------|----------|-------|--------|--------|-------|-------|---------|-----------------|--------------|-------|
| Al0.10CoCrFeMnNi          | FCC     | 13.921 | -5.244  | 1784.186 | 4.736 | 13.870 | 3.695  | 7.902 | 1.169 | 7.959   | 216.471         | 160.314      | 1.020 |
| Al0.20CoCrFeMnNi          | FCC     | 14.222 | -6.243  | 1767.826 | 4.027 | 13.895 | 4.044  | 7.808 | 1.169 | 7.857   | 213.654         | 158.692      | 0.870 |
| Al0.25CoCrCu0.5FeNiTi0.5  | FCC     | 15.433 | -9.088  | 1784.708 | 3.031 | 12.828 | 5.587  | 7.857 | 1.196 | 7.677   | 198.000         | 158.857      | 0.494 |
| Al0.25CoCrCu0.75FeNiTi0.5 | FCC     | 15.547 | -7.281  | 1765.299 | 3.769 | 12.737 | 5.459  | 8.000 | 1.196 | 7.735   | 194.909         | 158.000      | 0.522 |
| Al0.25CoCrFeNi            | FCC     | 12.708 | -6.754  | 1816.557 | 3.418 | 10.603 | 3.478  | 7.941 | 1.170 | 7.897   | 215.647         | 166.824      | 1.051 |
| Al0.25CoFeNi              | FCC     | 10.686 | -6.059  | 1704.728 | 3.006 | 7.700  | 3.945  | 8.538 | 1.169 | 8.115   | 196.154         | 168.923      | 0.687 |
| Al0.25MoNbTiV             | BCC     | 12.708 | -6.256  | 2353.734 | 4.781 | 24.322 | 4.003  | 4.882 | 1.120 | 7.077   | 163.647         | 162.118      | 0.793 |
| Al0.25NbTaTiV             | BCC     | 12.708 | -4.817  | 2446.439 | 6.454 | 5.018  | 3.832  | 4.647 | 1.119 | 8.606   | 130.000         | 155.059      | 0.865 |
| Al0.2Co1.5CrFeNi1.5Ti0.5  | FCC     | 13.671 | -12.404 | 1823.192 | 2.009 | 12.514 | 5.342  | 7.912 | 1.195 | 7.825   | 206.228         | 164.947      | 0.479 |
| Al0.375CoCrFeNi           | FCC     | 12.970 | -7.993  | 1791.326 | 2.906 | 10.957 | 4.117  | 7.800 | 1.170 | 7.748   | 211.486         | 164.229      | 0.765 |
| Al0.38CoCrFeMnNi          | FCC     | 14.558 | -7.847  | 1739.911 | 3.228 | 13.925 | 4.542  | 7.647 | 1.169 | 7.684   | 208.848         | 155.926      | 0.706 |
| Al0.3CoCrCuFe             | FCC     | 12.825 | 2.747   | 1720.172 | 8.030 | 10.531 | 3.718  | 8.116 | 1.169 | 7.846   | 197.674         | 156.465      | 0.928 |
| Al0.3CrFe1.5MnNi0.5       | FCC+BCC | 12.319 | -5.506  | 1758.033 | 3.934 | 12.969 | 4.703  | 7.186 | 1.168 | 7.373   | 212.674         | 150.651      | 0.557 |

|                            |             |        |         |              |            |        |       |           |       |       |             |             |       |
|----------------------------|-------------|--------|---------|--------------|------------|--------|-------|-----------|-------|-------|-------------|-------------|-------|
| Al0.3HfNbTaTiZr            | BCC         | 14.432 | -5.269  | 2433.0<br>27 | 6.664      | 12.038 | 4.977 | 4.32<br>1 | 1.133 | 9.511 | 108.30<br>2 | 129.01<br>9 | 0.583 |
| Al0.3NbTa0.8Ti1.4V0.2Zr1.3 | BCC         | 13.463 | -7.485  | 2316.4<br>88 | 4.167      | 10.660 | 5.305 | 4.34<br>0 | 1.237 | 7.750 | 110.24<br>0 | 126.22<br>0 | 0.478 |
| Al0.3NbTaTi1.4Zr1.3        | BCC         | 12.631 | -7.030  | 2360.7<br>68 | 4.241      | 10.318 | 4.845 | 4.34<br>0 | 1.133 | 8.174 | 112.56<br>0 | 127.82<br>0 | 0.538 |
| Al0.43CoCrFeMnNi           | FCC+<br>BCC | 14.622 | -8.252  | 1732.4<br>85 | 3.070      | 13.929 | 4.658 | 7.60<br>4 | 1.169 | 7.638 | 207.56<br>9 | 155.19<br>0 | 0.674 |
| Al0.49CoCrFeMnNi           | FCC+<br>BCC | 14.687 | -8.718  | 1723.7<br>52 | 2.904      | 13.933 | 4.787 | 7.55<br>4 | 1.169 | 7.584 | 206.06<br>6 | 154.32<br>4 | 0.641 |
| Al0.4CrCuFeNi2             | FCC         | 12.451 | -1.701  | 1699.6<br>46 | 12.44<br>1 | 11.040 | 3.859 | 8.55<br>6 | 1.169 | 7.947 | 194.07<br>4 | 159.33<br>3 | 0.836 |
| Al0.4Hf0.6NbTaTiZr         | BCC         | 14.500 | -7.770  | 2397.1<br>98 | 4.474      | 11.584 | 4.923 | 4.32<br>0 | 1.133 | 9.071 | 109.96<br>0 | 129.48<br>0 | 0.598 |
| Al0.56CoCrFeMnNi           | FCC+<br>BCC | 14.749 | -9.233  | 1713.8<br>03 | 2.738      | 13.936 | 4.925 | 7.49<br>6 | 1.169 | 7.523 | 204.35<br>3 | 153.33<br>8 | 0.608 |
| Al0.5CoCrCu0.5FeNiTi0.5    | FCC+<br>BCC | 15.745 | -10.843 | 1746.0<br>15 | 2.535      | 13.088 | 5.968 | 7.63<br>6 | 1.196 | 7.450 | 192.18<br>2 | 155.09<br>1 | 0.442 |
| Al0.5CoCrCuFe              | FCC         | 13.145 | 0.889   | 1685.2<br>08 | 24.92<br>1 | 11.036 | 4.491 | 7.88<br>9 | 1.169 | 7.617 | 192.00<br>0 | 152.88<br>9 | 0.652 |
| Al0.5CoCrCuFeNi            | FCC         | 14.697 | -1.521  | 1692.9<br>88 | 16.36<br>3 | 10.933 | 4.169 | 8.27<br>3 | 1.170 | 7.852 | 193.45<br>5 | 157.81<br>8 | 0.846 |
| Al0.5CoCrCuFeNiTi          | FCC+<br>BCC | 16.005 | -11.598 | 1731.1<br>44 | 2.389      | 14.139 | 6.535 | 7.61<br>5 | 1.196 | 7.341 | 181.53<br>8 | 150.46<br>2 | 0.375 |
| Al0.5CoCrCuFeNiTi0.2       | FCC         | 15.445 | -4.149  | 1701.6<br>90 | 6.335      | 11.875 | 4.931 | 8.12<br>3 | 1.196 | 7.735 | 190.73<br>7 | 156.14<br>0 | 0.635 |
| Al0.5CoCrCuFeNiTi0.4       | FCC         | 15.762 | -6.423  | 1709.8<br>03 | 4.196      | 12.624 | 5.491 | 7.98<br>3 | 1.196 | 7.627 | 188.20<br>3 | 154.57<br>6 | 0.523 |
| Al0.5CoCrCuFeNiTi0.6       | FCC+<br>BCC | 15.924 | -8.396  | 1717.3<br>83 | 3.257      | 13.231 | 5.922 | 7.85<br>2 | 1.196 | 7.525 | 185.83<br>6 | 153.11<br>5 | 0.454 |
| Al0.5CoCrCuFeNiTi0.8       | FCC+<br>BCC | 15.995 | -10.108 | 1724.4<br>82 | 2.729      | 13.728 | 6.262 | 7.73<br>0 | 1.196 | 7.430 | 183.61<br>9 | 151.74<br>6 | 0.408 |
| Al0.5CoCrCuFeNiTi1.2       | FCC+<br>BCC | 15.973 | -12.894 | 1737.4<br>08 | 2.152      | 14.480 | 6.756 | 7.50<br>7 | 1.196 | 7.257 | 179.58<br>2 | 149.25<br>4 | 0.350 |
| Al0.5CoCrCuFeNiTi1.4       | FCC+<br>BCC | 15.909 | -14.022 | 1743.3<br>09 | 1.978      | 14.764 | 6.938 | 7.40<br>6 | 1.196 | 7.178 | 177.73<br>9 | 148.11<br>6 | 0.331 |
| Al0.5CoCrCuFeNiTi1.6       | FCC+        | 15.821 | -15.005 | 1748.8       | 1.844      | 15.001 | 7.086 | 7.31      | 1.196 | 7.103 | 176.00      | 147.04      | 0.315 |

|                      |             |        |         |              |            |        |       |           |       |       |             |             |       |
|----------------------|-------------|--------|---------|--------------|------------|--------|-------|-----------|-------|-------|-------------|-------------|-------|
|                      | BCC         |        |         | 78           |            |        |       | 0         |       |       | 0           | 2           |       |
| Al0.5CoCrCuFeNiTi1.8 | FCC+<br>BCC | 15.717 | -15.860 | 1754.1<br>42 | 1.738      | 15.199 | 7.209 | 7.21<br>9 | 1.196 | 7.033 | 174.35<br>6 | 146.02<br>7 | 0.302 |
| Al0.5CoCrCuFeNiTi2   | FCC+<br>BCC | 15.599 | -16.604 | 1759.1<br>25 | 1.653      | 15.363 | 7.309 | 7.13<br>3 | 1.196 | 6.966 | 172.80<br>0 | 145.06<br>7 | 0.292 |
| Al0.5CoCrCuFeNiV0.2  | FCC         | 15.445 | -2.499  | 1710.1<br>82 | 10.56<br>9 | 11.268 | 4.146 | 8.15<br>8 | 1.169 | 7.790 | 191.15<br>8 | 157.89<br>5 | 0.899 |
| Al0.5CoCrCuFeNiV0.4  | FCC+<br>BCC | 15.762 | -3.344  | 1726.2<br>09 | 8.137      | 11.539 | 4.120 | 8.05<br>1 | 1.169 | 7.733 | 189.01<br>7 | 157.96<br>6 | 0.929 |
| Al0.5CoCrCuFeNiV0.6  | FCC+<br>BCC | 15.924 | -4.074  | 1741.1<br>86 | 6.806      | 11.759 | 4.093 | 7.95<br>1 | 1.169 | 7.680 | 187.01<br>6 | 158.03<br>3 | 0.951 |
| Al0.5CoCrCuFeNiV0.8  | FCC+<br>BCC | 15.995 | -4.706  | 1755.2<br>12 | 5.965      | 11.936 | 4.065 | 7.85<br>7 | 1.169 | 7.630 | 185.14<br>3 | 158.09<br>5 | 0.968 |
| Al0.5CoCrCuFeNiV1.0  | FCC+<br>BCC | 16.005 | -5.254  | 1768.3<br>75 | 5.387      | 12.079 | 4.036 | 7.76<br>9 | 1.169 | 7.583 | 183.38<br>5 | 158.15<br>4 | 0.983 |
| Al0.5CoCrCuFeNiV1.2  | BCC         | 15.973 | -5.730  | 1780.7<br>51 | 4.964      | 12.193 | 4.006 | 7.68<br>7 | 1.169 | 7.539 | 181.73<br>1 | 158.20<br>9 | 0.995 |
| Al0.5CoCrCuFeNiV1.4  | BCC         | 15.909 | -6.142  | 1792.4<br>11 | 4.643      | 12.284 | 3.976 | 7.60<br>9 | 1.169 | 7.497 | 180.17<br>4 | 158.26<br>1 | 1.006 |
| Al0.5CoCrCuFeNiV1.6  | BCC         | 15.821 | -6.499  | 1803.4<br>13 | 4.391      | 12.354 | 3.946 | 7.53<br>5 | 1.169 | 7.458 | 178.70<br>4 | 158.31<br>0 | 1.016 |
| Al0.5CoCrCuFeNiV1.8  | BCC         | 15.717 | -6.808  | 1813.8<br>13 | 4.187      | 12.407 | 3.916 | 7.46<br>6 | 1.169 | 7.421 | 177.31<br>5 | 158.35<br>6 | 1.025 |
| Al0.5CoCrCuFeNiV2.0  | BCC         | 15.599 | -7.076  | 1823.6<br>58 | 4.021      | 12.446 | 3.886 | 7.40<br>0 | 1.169 | 7.385 | 176.00<br>0 | 158.40<br>0 | 1.033 |
| Al0.5CoCrFeNi        | FCC+<br>BCC | 13.145 | -9.086  | 1767.4<br>97 | 2.557      | 11.255 | 4.602 | 7.66<br>7 | 1.170 | 7.608 | 207.55<br>6 | 161.77<br>8 | 0.621 |
| Al0.5CoFeNi          | FCC+<br>BCC | 11.239 | -9.469  | 1649.6<br>39 | 1.958      | 9.708  | 5.123 | 8.14<br>3 | 1.169 | 7.727 | 187.14<br>3 | 162.28<br>6 | 0.428 |
| Al0.5CrCuFeNi2       | FCC         | 12.602 | -2.512  | 1685.7<br>15 | 8.455      | 11.309 | 4.200 | 8.45<br>5 | 1.169 | 7.852 | 191.81<br>8 | 157.81<br>8 | 0.715 |
| Al0.5CrFe1.5MnNi0.5  | BCC         | 12.662 | -7.259  | 1721.3<br>86 | 3.002      | 12.876 | 5.163 | 7.00<br>0 | 1.168 | 7.164 | 206.33<br>3 | 147.33<br>3 | 0.475 |
| Al0.5HfNbTaTiZr      | BCC         | 14.697 | -8.860  | 2378.4<br>97 | 3.946      | 12.134 | 4.960 | 4.27<br>3 | 1.133 | 9.263 | 106.90<br>9 | 127.09<br>1 | 0.598 |
| Al0.5MoNbTiV         | BCC         | 13.145 | -8.988  | 2274.8<br>30 | 3.327      | 23.783 | 3.932 | 4.77<br>8 | 1.120 | 6.833 | 158.44<br>4 | 157.33<br>3 | 0.850 |

|                           |             |        |         |              |            |        |       |           |       |       |             |             |       |
|---------------------------|-------------|--------|---------|--------------|------------|--------|-------|-----------|-------|-------|-------------|-------------|-------|
| Al0.5NbTa0.8Ti1.5V0.2Zr   | BCC         | 13.778 | -10.778 | 2264.9<br>67 | 2.895      | 9.972  | 4.927 | 4.30<br>0 | 1.237 | 7.558 | 111.28<br>0 | 127.20<br>0 | 0.568 |
| Al0.5NbTaTiV              | BCC         | 13.145 | -8.395  | 2362.3<br>86 | 3.699      | 4.962  | 3.738 | 4.55<br>6 | 1.119 | 8.277 | 126.66<br>7 | 150.66<br>7 | 0.941 |
| Al0.62CoCrFeMnNi          | FCC+<br>BCC | 14.791 | -9.653  | 1705.4<br>72 | 2.613      | 13.936 | 5.033 | 7.44<br>8 | 1.169 | 7.471 | 202.91<br>8 | 152.51<br>2 | 0.584 |
| Al0.68CoCrFeMnNi          | FCC+<br>BCC | 14.825 | -10.053 | 1697.3<br>17 | 2.503      | 13.934 | 5.134 | 7.40<br>1 | 1.169 | 7.421 | 201.51<br>4 | 151.70<br>4 | 0.562 |
| Al0.6CrCuFeNi2            | FCC         | 12.720 | -3.265  | 1672.2<br>83 | 6.514      | 11.551 | 4.489 | 8.35<br>7 | 1.169 | 7.760 | 189.64<br>3 | 156.35<br>7 | 0.631 |
| Al0.75CoCrCu0.25FeNiTi0.5 | FCC+<br>BCC | 15.547 | -14.388 | 1726.7<br>32 | 1.866      | 13.299 | 6.381 | 7.27<br>3 | 1.196 | 7.165 | 189.45<br>5 | 152.18<br>2 | 0.382 |
| Al0.75CoCrFeMnNi          | FCC+<br>BCC | 14.855 | -10.495 | 1688.0<br>18 | 2.389      | 13.931 | 5.243 | 7.34<br>8 | 1.169 | 7.363 | 199.91<br>3 | 150.78<br>3 | 0.540 |
| Al0.75CoCrFeNi            | FCC+<br>BCC | 13.332 | -10.903 | 1723.6<br>01 | 2.108      | 11.721 | 5.301 | 7.42<br>1 | 1.170 | 7.349 | 200.31<br>6 | 157.26<br>3 | 0.474 |
| Al0.75CoFeNi              | FCC+<br>BCC | 11.467 | -11.947 | 1601.8<br>94 | 1.538      | 10.939 | 5.805 | 7.80<br>0 | 1.169 | 7.391 | 179.33<br>3 | 156.53<br>3 | 0.340 |
| Al0.75HfNbTaTiZr          | BCC         | 14.855 | -12.643 | 2315.6<br>70 | 2.721      | 12.215 | 4.933 | 4.21<br>7 | 1.133 | 8.977 | 105.30<br>4 | 124.87<br>0 | 0.610 |
| Al0.75MoNbTiV             | BCC         | 13.332 | -11.125 | 2204.2<br>32 | 2.642      | 23.276 | 3.863 | 4.68<br>4 | 1.120 | 6.615 | 153.78<br>9 | 153.05<br>3 | 0.893 |
| Al0.7Co0.3CrFeNi          | FCC+<br>BCC | 12.795 | -11.397 | 1725.7<br>07 | 1.937      | 11.918 | 5.538 | 7.20<br>0 | 1.170 | 7.134 | 200.42<br>5 | 154.30<br>0 | 0.417 |
| Al0.81CoCrFeMnNi          | FCC+<br>BCC | 14.873 | -10.856 | 1680.2<br>26 | 2.302      | 13.927 | 5.329 | 7.30<br>3 | 1.169 | 7.315 | 198.57<br>1 | 150.01<br>0 | 0.524 |
| Al0.875CoCrFeNi           | FCC+<br>BCC | 13.370 | -11.655 | 1703.3<br>41 | 1.954      | 11.902 | 5.560 | 7.30<br>8 | 1.170 | 7.229 | 196.97<br>4 | 155.17<br>9 | 0.432 |
| Al0.88CoCrFeMnNi          | FCC+<br>BCC | 14.888 | -11.255 | 1671.3<br>36 | 2.211      | 13.920 | 5.422 | 7.25<br>2 | 1.169 | 7.260 | 197.04<br>1 | 149.12<br>9 | 0.506 |
| Al0.8CoCrCuFe             | FCC+<br>BCC | 13.351 | -1.354  | 1638.2<br>24 | 16.15<br>1 | 11.581 | 5.238 | 7.58<br>3 | 1.169 | 7.309 | 184.37<br>5 | 148.08<br>3 | 0.487 |
| Al0.8CoCrCuFeNi           | FCC+<br>BCC | 14.871 | -3.615  | 1653.7<br>03 | 6.803      | 11.578 | 4.922 | 8.00<br>0 | 1.170 | 7.585 | 187.06<br>9 | 153.58<br>6 | 0.614 |
| Al0.8CrCuFeNi2            | FCC         | 12.884 | -4.614  | 1646.8<br>06 | 4.599      | 11.963 | 4.956 | 8.17<br>2 | 1.169 | 7.585 | 185.51<br>7 | 153.58<br>6 | 0.525 |
| Al0.95CoCrFeMnNi          | FCC+        | 14.895 | -11.632 | 1662.6       | 2.129      | 13.911 | 5.508 | 7.20      | 1.169 | 7.206 | 195.54      | 148.26      | 0.491 |

|                          |         |        |         |          |       |        |       |       |       |       |         |         |       |
|--------------------------|---------|--------|---------|----------|-------|--------|-------|-------|-------|-------|---------|---------|-------|
|                          | BCC     |        |         | 55       |       |        |       | 2     |       |       | 6       | 9       |       |
| Al1.125CuFe0.75NiTi1.125 | FCC     | 13.299 | -19.955 | 1535.546 | 1.023 | 15.777 | 7.168 | 6.975 | 1.194 | 6.378 | 139.500 | 131.350 | 0.259 |
| Al1.25CoCrFeMnNi         | BCC     | 14.865 | -13.030 | 1627.654 | 1.857 | 13.860 | 5.810 | 7.000 | 1.169 | 6.989 | 189.520 | 144.800 | 0.440 |
| Al1.25CoCrFeNi           | BCC     | 13.345 | -13.424 | 1648.350 | 1.639 | 12.298 | 6.118 | 7.000 | 1.170 | 6.905 | 187.905 | 149.524 | 0.357 |
| Al1.2CrCuFeNi2           | FCC+BCC | 13.017 | -6.785  | 1600.785 | 3.071 | 12.570 | 5.603 | 7.839 | 1.169 | 7.269 | 178.065 | 148.581 | 0.415 |
| Al1.3CoCrCuFe            | FCC+BCC | 13.330 | -4.030  | 1571.738 | 5.199 | 12.125 | 5.948 | 7.151 | 1.169 | 6.873 | 173.585 | 141.283 | 0.377 |
| Al1.3CoCrCuFeNi          | FCC+BCC | 14.852 | -6.238  | 1596.541 | 3.801 | 12.294 | 5.686 | 7.603 | 1.170 | 7.196 | 177.778 | 147.429 | 0.459 |
| Al1.5CoCrCuFe            | FCC+BCC | 13.254 | -4.826  | 1548.528 | 4.252 | 12.258 | 6.126 | 7.000 | 1.169 | 6.721 | 169.818 | 138.909 | 0.353 |
| Al1.5CoCrCuFeNi          | FCC+BCC | 14.784 | -7.053  | 1576.139 | 3.304 | 12.493 | 5.893 | 7.462 | 1.170 | 7.058 | 174.462 | 145.231 | 0.426 |
| Al1.5CoCrFeNi            | BCC     | 13.254 | -14.281 | 1615.855 | 1.500 | 12.469 | 6.365 | 6.818 | 1.170 | 6.714 | 182.545 | 146.182 | 0.327 |
| Al1.5CoCrFeNiTi          | BCC     | 14.784 | -22.722 | 1665.878 | 1.084 | 14.005 | 7.292 | 6.385 | 1.195 | 6.378 | 172.308 | 140.615 | 0.278 |
| Al1.8CoCrCuFe            | FCC+BCC | 13.098 | -5.803  | 1516.715 | 3.424 | 12.396 | 6.323 | 6.793 | 1.169 | 6.512 | 164.655 | 135.655 | 0.328 |
| Al1.8CoCrCuFeNi          | FCC+BCC | 14.644 | -8.080  | 1547.786 | 2.805 | 12.726 | 6.133 | 7.265 | 1.170 | 6.865 | 169.853 | 142.176 | 0.389 |
| Al2.0CoCrCuFe            | FCC+BCC | 12.976 | -6.333  | 1497.273 | 3.068 | 12.455 | 6.418 | 6.667 | 1.169 | 6.385 | 161.500 | 133.667 | 0.315 |
| Al2.0CrCuFeNi2           | BCC     | 12.885 | -9.633  | 1524.520 | 2.039 | 13.243 | 6.297 | 7.286 | 1.169 | 6.746 | 165.714 | 140.286 | 0.325 |
| Al2.3CoCrCuFe            | FCC+BCC | 12.774 | -6.984  | 1470.426 | 2.689 | 12.507 | 6.522 | 6.492 | 1.169 | 6.209 | 157.143 | 130.921 | 0.300 |
| Al2.3CoCrCuFeNi          | FCC+BCC | 14.345 | -9.375  | 1505.710 | 2.304 | 12.980 | 6.403 | 6.973 | 1.170 | 6.579 | 163.014 | 137.644 | 0.350 |
| Al2.5CoCrCuFe            | FCC+BCC | 12.632 | -7.337  | 1453.904 | 2.503 | 12.522 | 6.571 | 6.385 | 1.169 | 6.101 | 154.462 | 129.231 | 0.293 |
| Al2.5CoCrCuFeNi          | FCC+BCC | 14.213 | -9.778  | 1490.450 | 2.166 | 13.046 | 6.478 | 6.867 | 1.170 | 6.475 | 160.533 | 136.000 | 0.339 |

|                                             |             |        |         |              |       |        |       |           |       |       |             |             |       |
|---------------------------------------------|-------------|--------|---------|--------------|-------|--------|-------|-----------|-------|-------|-------------|-------------|-------|
| Al <sub>2.5</sub> CoCrFeNi                  | BCC         | 12.632 | -16.095 | 1510.8<br>73 | 1.186 | 12.725 | 6.842 | 6.23<br>1 | 1.170 | 6.095 | 165.23<br>1 | 135.38<br>5 | 0.270 |
| Al <sub>2.8</sub> CoCrCuFe                  | BCC         | 12.412 | -7.768  | 1430.9<br>44 | 2.286 | 12.520 | 6.619 | 6.23<br>5 | 1.169 | 5.950 | 150.73<br>5 | 126.88<br>2 | 0.283 |
| Al <sub>2.8</sub> CoCrCuFeNi                | BCC         | 14.005 | -10.283 | 1469.0<br>28 | 2.001 | 13.117 | 6.566 | 6.71<br>8 | 1.170 | 6.330 | 157.05<br>1 | 133.69<br>2 | 0.325 |
| Al <sub>2</sub> CoCrCuFeNi                  | FCC+<br>BCC | 14.532 | -8.653  | 1530.2<br>34 | 2.570 | 12.844 | 6.257 | 7.14<br>3 | 1.170 | 6.746 | 167.00<br>0 | 140.28<br>6 | 0.371 |
| Al <sub>2</sub> CoCrFeMo <sub>0.5</sub> Ni  | BCC         | 14.232 | -14.296 | 1661.8<br>37 | 1.654 | 16.351 | 6.491 | 6.46<br>2 | 1.169 | 6.672 | 185.15<br>4 | 147.23<br>1 | 0.338 |
| Al <sub>2</sub> CoCrFeNi                    | BCC         | 12.976 | -15.444 | 1558.9<br>90 | 1.310 | 12.662 | 6.678 | 6.50<br>0 | 1.170 | 6.378 | 173.16<br>7 | 140.33<br>3 | 0.291 |
| Al <sub>2</sub> CoCrFeNiTi                  | BCC         | 14.532 | -23.347 | 1613.5<br>63 | 1.004 | 13.836 | 7.299 | 6.14<br>3 | 1.195 | 6.114 | 165.00<br>0 | 136.00<br>0 | 0.273 |
| Al <sub>3.0</sub> CoCrCuFe                  | BCC         | 12.264 | -8.000  | 1416.7<br>30 | 2.172 | 12.506 | 6.639 | 6.14<br>3 | 1.169 | 5.857 | 148.42<br>9 | 125.42<br>9 | 0.278 |
| Al <sub>3</sub> CoCrCuFeNi                  | BCC         | 13.863 | -10.563 | 1455.6<br>39 | 1.911 | 13.148 | 6.610 | 6.62<br>5 | 1.170 | 6.239 | 154.87<br>5 | 132.25<br>0 | 0.317 |
| Al <sub>3</sub> CoCrFeNi                    | BCC         | 12.264 | -16.408 | 1469.6<br>30 | 1.098 | 12.705 | 6.916 | 6.00<br>0 | 1.170 | 5.851 | 158.42<br>9 | 131.14<br>3 | 0.256 |
| AlCo <sub>2</sub> CrFeMo <sub>0.5</sub> Ni  | FCC+<br>BCC | 14.232 | -10.698 | 1790.2<br>26 | 2.382 | 14.824 | 5.437 | 7.38<br>5 | 1.169 | 7.629 | 206.53<br>8 | 163.23<br>1 | 0.482 |
| AlCoCrCuFe                                  | FCC+<br>BCC | 13.381 | -2.560  | 1610.0<br>34 | 8.415 | 11.842 | 5.580 | 7.40<br>0 | 1.169 | 7.124 | 179.80<br>0 | 145.20<br>0 | 0.430 |
| AlCoCrCuFeMnNi                              | FCC+<br>BCC | 16.178 | -5.633  | 1613.8<br>81 | 4.635 | 14.038 | 5.183 | 7.71<br>4 | 1.169 | 7.423 | 185.28<br>6 | 146.57<br>1 | 0.602 |
| AlCoCrCuFeNi                                | FCC+<br>BCC | 14.897 | -4.778  | 1629.6<br>95 | 5.081 | 11.908 | 5.281 | 7.83<br>3 | 1.170 | 7.422 | 183.16<br>7 | 151.00<br>0 | 0.534 |
| AlCoCrCuFeNiTi                              | FCC+<br>BCC | 16.178 | -13.796 | 1674.1<br>67 | 1.963 | 14.257 | 6.778 | 7.28<br>6 | 1.196 | 7.009 | 173.57<br>1 | 145.14<br>3 | 0.352 |
| AlCoCrCuFeNiV                               | FCC+<br>BCC | 16.178 | -7.755  | 1708.7<br>39 | 3.565 | 12.500 | 4.954 | 7.42<br>9 | 1.169 | 7.233 | 175.28<br>6 | 152.28<br>6 | 0.659 |
| AlCoCrCuNiTi                                | BCC         | 14.897 | -16.667 | 1651.3<br>62 | 1.476 | 15.100 | 6.900 | 7.16<br>7 | 1.190 | 6.863 | 167.33<br>3 | 141.00<br>0 | 0.313 |
| AlCoCrFeMo <sub>0.1</sub> Ni                | BCC         | 13.921 | -12.134 | 1707.8<br>57 | 1.959 | 13.060 | 5.778 | 7.17<br>6 | 1.169 | 7.176 | 196.45<br>1 | 154.70<br>6 | 0.417 |
| AlCoCrFeMo <sub>0.5</sub> Ni <sub>1.5</sub> | FCC+        | 14.534 | -11.528 | 1788.7       | 2.255 | 15.457 | 5.610 | 7.33      | 1.169 | 7.523 | 205.58      | 161.83      | 0.462 |

|                  |             |        |         |              |       |        |        |           |       |       |             |             |       |
|------------------|-------------|--------|---------|--------------|-------|--------|--------|-----------|-------|-------|-------------|-------------|-------|
|                  | BCC         |        |         | 45           |       |        |        | 3         |       |       | 3           | 3           |       |
| AlCoCrFeMo0.5Ni2 | FCC+<br>BCC | 14.232 | -11.456 | 1784.0<br>72 | 2.217 | 15.039 | 5.471  | 7.53<br>8 | 1.169 | 7.629 | 205.15<br>4 | 163.23<br>1 | 0.476 |
| AlCoCrFeNb0.1Ni  | BCC         | 13.921 | -13.318 | 1704.9<br>94 | 1.782 | 12.190 | 5.919  | 7.15<br>7 | 1.168 | 7.145 | 192.05<br>9 | 153.52<br>9 | 0.397 |
| AlCoCrFeNi       | BCC         | 13.381 | -12.320 | 1684.0<br>94 | 1.829 | 12.057 | 5.778  | 7.20<br>0 | 1.170 | 7.116 | 193.80<br>0 | 153.20<br>0 | 0.401 |
| AlCoCrFeNiNb0.1  | BCC         | 13.921 | -13.318 | 1704.9<br>94 | 1.782 | 12.190 | 5.919  | 7.15<br>7 | 1.168 | 7.145 | 192.05<br>9 | 153.52<br>9 | 0.397 |
| AlCoCrFeNiSi     | BCC         | 14.897 | -27.333 | 1684.5<br>78 | 0.918 | 11.908 | 6.611  | 6.66<br>7 | 1.265 | 6.317 | 169.33<br>3 | 144.33<br>3 | 0.341 |
| AlCoCrFeNiSi0.2  | BCC         | 14.222 | -16.391 | 1684.2<br>06 | 1.461 | 12.053 | 6.018  | 7.07<br>7 | 1.265 | 6.932 | 188.15<br>4 | 151.15<br>4 | 0.393 |
| AlCoCrFeNiSi0.4  | BCC         | 14.585 | -19.835 | 1684.3<br>09 | 1.238 | 12.033 | 6.214  | 6.96<br>3 | 1.265 | 6.761 | 182.92<br>6 | 149.25<br>9 | 0.378 |
| AlCoCrFeNiSi0.6  | BCC         | 14.778 | -22.755 | 1684.4<br>05 | 1.094 | 12.001 | 6.373  | 6.85<br>7 | 1.265 | 6.602 | 178.07<br>1 | 147.50<br>0 | 0.364 |
| AlCoCrFeNiTi     | BCC         | 14.897 | -21.556 | 1726.9<br>12 | 1.193 | 14.135 | 7.221  | 6.66<br>7 | 1.195 | 6.685 | 180.83<br>3 | 146.00<br>0 | 0.286 |
| AlCoCrFeNiTi0.5  | BCC         | 14.697 | -17.917 | 1707.4<br>49 | 1.401 | 13.378 | 6.718  | 6.90<br>9 | 1.195 | 6.881 | 186.72<br>7 | 149.27<br>3 | 0.326 |
| AlCoCuFeNi       | FCC+<br>BCC | 13.381 | -5.280  | 1519.6<br>34 | 3.851 | 11.146 | 5.609  | 8.20<br>0 | 1.169 | 7.468 | 164.00<br>0 | 149.20<br>0 | 0.425 |
| AlCoCuFeNiSi     | FCC+<br>BCC | 13.381 | -19.840 | 1511.4<br>34 | 1.019 | 11.002 | 7.141  | 7.00<br>0 | 1.264 | 6.150 | 133.40<br>0 | 133.20<br>0 | 0.262 |
| AlCoCuFeNiTi     | FCC+<br>BCC | 13.381 | -15.520 | 1562.2<br>34 | 1.347 | 14.797 | 7.091  | 7.00<br>0 | 1.194 | 6.592 | 147.20<br>0 | 135.20<br>0 | 0.266 |
| AlCoCuFeNiZr     | FCC+<br>BCC | 13.381 | -23.360 | 1599.6<br>34 | 0.916 | 21.624 | 10.234 | 7.00<br>0 | 1.323 | 6.986 | 137.60<br>0 | 127.40<br>0 | 0.128 |
| AlCoFeNi         | BCC         | 11.526 | -13.750 | 1560.1<br>18 | 1.308 | 11.755 | 6.237  | 7.50<br>0 | 1.169 | 7.098 | 172.50<br>0 | 151.50<br>0 | 0.296 |
| AlCoFeNiTiVZr    | BCC         | 16.178 | -32.163 | 1784.6<br>39 | 0.898 | 19.449 | 9.413  | 6.14<br>3 | 1.322 | 6.503 | 143.14<br>3 | 135.28<br>6 | 0.183 |
| AlCr0.5NbTiV     | BCC         | 13.145 | -15.407 | 1977.2<br>16 | 1.687 | 3.765  | 5.233  | 4.44<br>4 | 1.183 | 5.664 | 124.11<br>1 | 132.44<br>4 | 0.480 |
| AlCrCuFeNi       | FCC+<br>BCC | 13.381 | -4.000  | 1602.0<br>34 | 5.359 | 12.416 | 5.628  | 7.60<br>0 | 1.169 | 7.124 | 178.00<br>0 | 145.20<br>0 | 0.422 |

|                        |             |        |         |              |       |        |       |           |       |       |             |             |       |
|------------------------|-------------|--------|---------|--------------|-------|--------|-------|-----------|-------|-------|-------------|-------------|-------|
| AlCrCuFeNi0.6          | FCC+<br>BCC | 13.242 | -2.684  | 1591.0<br>80 | 7.849 | 12.332 | 5.760 | 7.39<br>1 | 1.169 | 6.969 | 176.08<br>7 | 142.17<br>4 | 0.399 |
| AlCrCuFeNi0.8          | FCC+<br>BCC | 13.351 | -3.403  | 1596.7<br>85 | 6.265 | 12.388 | 5.694 | 7.50<br>0 | 1.169 | 7.050 | 177.08<br>3 | 143.75<br>0 | 0.412 |
| AlCrCuFeNi1.2          | FCC+<br>BCC | 13.357 | -4.497  | 1606.8<br>79 | 4.773 | 12.421 | 5.563 | 7.69<br>2 | 1.169 | 7.193 | 178.84<br>6 | 146.53<br>8 | 0.432 |
| AlCrCuFeNi1.4          | FCC+<br>BCC | 13.295 | -4.911  | 1611.3<br>65 | 4.363 | 12.409 | 5.500 | 7.77<br>8 | 1.169 | 7.256 | 179.63<br>0 | 147.77<br>8 | 0.440 |
| AlCrCuFeNi2            | FCC+<br>BCC | 12.976 | -5.778  | 1623.0<br>28 | 3.645 | 12.297 | 5.317 | 8.00<br>0 | 1.169 | 7.422 | 181.66<br>7 | 151.00<br>0 | 0.459 |
| AlCrFeNi               | BCC         | 11.526 | -13.250 | 1663.1<br>18 | 1.447 | 12.214 | 6.260 | 6.75<br>0 | 1.169 | 6.668 | 190.00<br>0 | 146.50<br>0 | 0.294 |
| AlCrFeNiMo0.2          | BCC         | 12.568 | -12.653 | 1721.8<br>26 | 1.710 | 14.744 | 6.204 | 6.71<br>4 | 1.168 | 6.836 | 196.61<br>9 | 150.47<br>6 | 0.327 |
| AlCrFeNiMo0.5          | BCC         | 13.145 | -11.852 | 1800.1<br>04 | 1.997 | 17.223 | 6.112 | 6.66<br>7 | 1.168 | 7.060 | 205.44<br>4 | 155.77<br>8 | 0.352 |
| AlCuFeNiTi             | FCC         | 13.381 | -17.600 | 1554.2<br>34 | 1.182 | 15.354 | 7.162 | 7.20<br>0 | 1.194 | 6.592 | 145.40<br>0 | 135.20<br>0 | 0.261 |
| AlCuNiTi               | FCC         | 11.526 | -23.250 | 1490.0<br>43 | 0.739 | 16.688 | 6.924 | 7.00<br>0 | 1.188 | 6.270 | 129.00<br>0 | 126.50<br>0 | 0.240 |
| AlMo0.5NbTa0.5TiZr     | BCC         | 14.533 | -18.280 | 2169.0<br>94 | 1.725 | 21.761 | 5.041 | 4.30<br>0 | 1.192 | 7.148 | 123.30<br>0 | 128.40<br>0 | 0.572 |
| AlMoNbTiV              | BCC         | 13.381 | -12.800 | 2140.6<br>94 | 2.238 | 22.798 | 3.796 | 4.60<br>0 | 1.120 | 6.419 | 149.60<br>0 | 149.20<br>0 | 0.928 |
| AlNb1.5Ta0.5Ti1.5Zr0.5 | BCC         | 12.511 | -16.200 | 2135.7<br>94 | 1.649 | 8.112  | 3.481 | 4.20<br>0 | 1.133 | 6.788 | 105.70<br>0 | 126.30<br>0 | 1.033 |
| AlNbTaTiV              | BCC         | 13.381 | -13.440 | 2219.4<br>94 | 2.210 | 4.841  | 3.567 | 4.40<br>0 | 1.119 | 7.719 | 121.00<br>0 | 143.20<br>0 | 1.052 |
| AlNbTiV                | BCC         | 11.526 | -16.250 | 1951.8<br>68 | 1.384 | 3.354  | 3.947 | 4.25<br>0 | 1.119 | 5.473 | 104.75<br>0 | 129.00<br>0 | 0.740 |
| Co0.5CrFeNiCuAl        | FCC+<br>BCC | 14.697 | -5.686  | 1617.1<br>22 | 4.180 | 12.169 | 5.448 | 7.72<br>7 | 1.170 | 7.286 | 180.81<br>8 | 148.36<br>4 | 0.495 |
| Co1.5CrFeNi1.5Ti0.5    | FCC         | 12.858 | -10.744 | 1855.5<br>45 | 2.221 | 12.187 | 4.885 | 8.09<br>1 | 1.197 | 8.012 | 211.18<br>2 | 168.18<br>2 | 0.539 |
| CoCr0.5FeNiCuAl        | FCC+<br>BCC | 14.697 | -6.479  | 1579.6<br>67 | 3.583 | 11.650 | 5.440 | 8.00<br>0 | 1.170 | 7.443 | 174.45<br>5 | 150.18<br>2 | 0.497 |
| CoCrCuFeNiTi           | FCC         | 14.897 | -8.444  | 1797.6       | 3.171 | 13.876 | 6.117 | 8.00      | 1.197 | 7.728 | 190.83      | 156.66      | 0.398 |



|                    |             |        |         |              |       |        |       |           |       |       |             |             |       |
|--------------------|-------------|--------|---------|--------------|-------|--------|-------|-----------|-------|-------|-------------|-------------|-------|
|                    |             |        |         | 17           |       |        |       | 0         |       |       | 3           | 7           |       |
| CoCrCuFeNiTi0.5    | FCC         | 14.697 | -3.702  | 1784.5<br>82 | 7.084 | 12.236 | 4.822 | 8.36<br>4 | 1.197 | 8.019 | 197.63<br>6 | 160.90<br>9 | 0.632 |
| CoCrFe0.5NiCuAl    | FCC+<br>BCC | 14.697 | -3.504  | 1613.2<br>13 | 6.766 | 12.398 | 5.404 | 7.81<br>8 | 1.170 | 7.380 | 180.63<br>6 | 149.27<br>3 | 0.503 |
| CoCrFeMnNi         | FCC         | 13.381 | -4.160  | 1801.2<br>00 | 5.794 | 13.836 | 3.269 | 8.00<br>0 | 1.096 | 8.064 | 219.40<br>0 | 162.00<br>0 | 1.252 |
| CoCrFeMnNiV0.25    | FCC         | 14.335 | -5.297  | 1819.3<br>81 | 4.924 | 13.810 | 3.288 | 7.85<br>7 | 1.096 | 7.971 | 215.04<br>8 | 161.90<br>5 | 1.326 |
| CoCrFeMnNiV0.5     | FCC         | 14.697 | -6.215  | 1835.9<br>09 | 4.342 | 13.759 | 3.295 | 7.72<br>7 | 1.096 | 7.886 | 211.09<br>1 | 161.81<br>8 | 1.354 |
| CoCrFeNi0.5CuAl    | FCC+<br>BCC | 14.697 | -4.562  | 1620.7<br>58 | 5.222 | 11.930 | 5.427 | 7.63<br>6 | 1.170 | 7.286 | 181.63<br>6 | 148.36<br>4 | 0.499 |
| CoCrFeNiAl         | BCC         | 13.381 | -12.320 | 1684.0<br>94 | 1.829 | 12.057 | 5.778 | 7.20<br>0 | 1.170 | 7.116 | 193.80<br>0 | 153.20<br>0 | 0.401 |
| CoCrFeNiAl0.25     | FCC         | 12.708 | -8.249  | 1816.5<br>57 | 2.798 | 10.603 | 3.478 | 7.94<br>1 | 1.170 | 7.897 | 215.64<br>7 | 166.82<br>4 | 1.051 |
| CoCrFeNiAl0.375    | FCC         | 12.970 | -9.169  | 1791.3<br>26 | 2.534 | 10.957 | 4.117 | 7.80<br>0 | 1.170 | 7.748 | 211.48<br>6 | 164.22<br>9 | 0.765 |
| CoCrFeNiAl0.3Mo0.1 | FCC         | 13.436 | -9.258  | 1831.0<br>55 | 2.657 | 11.870 | 3.903 | 7.84<br>1 | 1.169 | 7.890 | 216.56<br>8 | 167.22<br>7 | 0.882 |
| CoCrFeNiAl0.5      | FCC+<br>BCC | 13.145 | -9.975  | 1767.4<br>97 | 2.329 | 11.255 | 4.602 | 7.66<br>7 | 1.170 | 7.608 | 207.55<br>6 | 161.77<br>8 | 0.621 |
| CoCrFeNiAl0.75     | FCC+<br>BCC | 13.332 | -11.302 | 1723.6<br>01 | 2.033 | 11.721 | 5.301 | 7.42<br>1 | 1.170 | 7.349 | 200.31<br>6 | 157.26<br>3 | 0.474 |
| CoCrFeNiAl0.875    | FCC+<br>BCC | 13.370 | -11.845 | 1703.3<br>41 | 1.923 | 11.902 | 5.560 | 7.30<br>8 | 1.170 | 7.229 | 196.97<br>4 | 155.17<br>9 | 0.432 |
| CoCrFeNiAl1.25     | BCC         | 13.345 | -13.098 | 1648.3<br>50 | 1.679 | 12.298 | 6.118 | 7.00<br>0 | 1.170 | 6.905 | 187.90<br>5 | 149.52<br>4 | 0.357 |
| CoCrFeNiAl1.5      | BCC         | 13.254 | -13.686 | 1615.8<br>55 | 1.565 | 12.469 | 6.365 | 6.81<br>8 | 1.170 | 6.714 | 182.54<br>5 | 146.18<br>2 | 0.327 |
| CoCrFeNiAl2        | BCC         | 12.976 | -14.444 | 1558.9<br>90 | 1.400 | 12.662 | 6.678 | 6.50<br>0 | 1.170 | 6.378 | 173.16<br>7 | 140.33<br>3 | 0.291 |
| CoCrFeNiAl2.5      | BCC         | 12.632 | -14.817 | 1510.8<br>73 | 1.288 | 12.725 | 6.842 | 6.23<br>1 | 1.170 | 6.095 | 165.23<br>1 | 135.38<br>5 | 0.270 |
| CoCrFeNiAl3        | BCC         | 12.264 | -14.939 | 1469.6<br>30 | 1.206 | 12.705 | 6.916 | 6.00<br>0 | 1.170 | 5.851 | 158.42<br>9 | 131.14<br>3 | 0.256 |

|                      |             |        |        |              |       |        |       |           |       |       |             |             |       |
|----------------------|-------------|--------|--------|--------------|-------|--------|-------|-----------|-------|-------|-------------|-------------|-------|
| CoCrFeNiCu0.25Al     | BCC         | 14.335 | -3.302 | 1668.5<br>51 | 7.245 | 12.049 | 5.641 | 7.38<br>1 | 1.170 | 7.203 | 190.76<br>2 | 152.57<br>1 | 0.451 |
| CoCrFeNiCu0.25Al0.75 | FCC+<br>BCC | 14.316 | -2.830 | 1705.3<br>06 | 8.627 | 11.687 | 5.166 | 7.60<br>0 | 1.170 | 7.429 | 196.80<br>0 | 156.40<br>0 | 0.536 |
| CoCrFeNiCu0.5Al      | BCC         | 14.697 | -3.901 | 1654.4<br>22 | 6.233 | 12.019 | 5.513 | 7.54<br>5 | 1.170 | 7.283 | 188.00<br>0 | 152.00<br>0 | 0.484 |
| CoCrFeNiCu0.5Al0.5   | FCC         | 14.533 | -3.080 | 1726.5<br>17 | 8.147 | 11.118 | 4.370 | 8.00<br>0 | 1.170 | 7.742 | 199.80<br>0 | 159.60<br>0 | 0.761 |
| CoCrFeNiCu0.75Al0.25 | FCC         | 14.316 | -3.310 | 1747.7<br>29 | 7.559 | 10.316 | 3.250 | 8.40<br>0 | 1.170 | 8.055 | 202.80<br>0 | 162.80<br>0 | 1.355 |
| CoCrFeNiCuAl         | FCC+<br>BCC | 14.897 | -4.778 | 1629.6<br>95 | 5.081 | 11.908 | 5.281 | 7.83<br>3 | 1.170 | 7.422 | 183.16<br>7 | 151.00<br>0 | 0.534 |
| CoCrFeNiCuAl0.3      | FCC         | 14.432 | -4.030 | 1721.6<br>49 | 6.166 | 10.368 | 3.423 | 8.47<br>2 | 1.170 | 8.047 | 198.11<br>3 | 160.90<br>6 | 1.232 |
| CoCrFeNiCuAl0.5      | FCC         | 14.697 | -4.298 | 1692.9<br>88 | 5.790 | 10.933 | 4.169 | 8.27<br>3 | 1.170 | 7.852 | 193.45<br>5 | 157.81<br>8 | 0.846 |
| CoCrFeNiCuAl0.5V0.2  | FCC         | 15.445 | -5.737 | 1710.1<br>82 | 4.604 | 11.268 | 4.146 | 8.15<br>8 | 1.169 | 7.790 | 191.15<br>8 | 157.89<br>5 | 0.899 |
| CoCrFeNiCuAl0.5V0.4  | FCC+<br>BCC | 15.762 | -5.883 | 1726.2<br>09 | 4.625 | 11.539 | 4.120 | 8.05<br>1 | 1.169 | 7.733 | 189.01<br>7 | 157.96<br>6 | 0.929 |
| CoCrFeNiCuAl0.5V1.2  | FCC+<br>BCC | 15.973 | -6.202 | 1780.7<br>51 | 4.586 | 12.193 | 4.006 | 7.68<br>7 | 1.169 | 7.539 | 181.73<br>1 | 158.20<br>9 | 0.995 |
| CoCrFeNiCuAl0.5V1.4  | FCC+<br>BCC | 15.909 | -6.234 | 1792.4<br>11 | 4.574 | 12.284 | 3.976 | 7.60<br>9 | 1.169 | 7.497 | 180.17<br>4 | 158.26<br>1 | 1.006 |
| CoCrFeNiCuAl0.5V1.6  | FCC+<br>BCC | 15.821 | -6.253 | 1803.4<br>13 | 4.563 | 12.354 | 3.946 | 7.53<br>5 | 1.169 | 7.458 | 178.70<br>4 | 158.31<br>0 | 1.016 |
| CoCrFeNiCuAl0.5V1.8  | FCC+<br>BCC | 15.717 | -6.260 | 1813.8<br>13 | 4.554 | 12.407 | 3.916 | 7.46<br>6 | 1.169 | 7.421 | 177.31<br>5 | 158.35<br>6 | 1.025 |
| CoCrFeNiCuAl0.5V2    | FCC+<br>BCC | 15.599 | -6.258 | 1823.6<br>58 | 4.546 | 12.446 | 3.886 | 7.40<br>0 | 1.169 | 7.385 | 176.00<br>0 | 158.40<br>0 | 1.033 |
| CoCrFeNiCuAl0.8      | FCC+<br>BCC | 14.871 | -4.614 | 1653.7<br>03 | 5.330 | 11.578 | 4.922 | 8.00<br>0 | 1.170 | 7.585 | 187.06<br>9 | 153.58<br>6 | 0.614 |
| CoCrFeNiCuAl1.3      | FCC+<br>BCC | 14.852 | -4.969 | 1596.5<br>41 | 4.772 | 12.294 | 5.686 | 7.60<br>3 | 1.170 | 7.196 | 177.77<br>8 | 147.42<br>9 | 0.459 |
| CoCrFeNiCuAl1.5      | FCC+<br>BCC | 14.784 | -5.065 | 1576.1<br>39 | 4.601 | 12.493 | 5.893 | 7.46<br>2 | 1.170 | 7.058 | 174.46<br>2 | 145.23<br>1 | 0.426 |
| CoCrFeNiCuAl1.8      | FCC+        | 14.644 | -5.173 | 1547.7       | 4.381 | 12.726 | 6.133 | 7.26      | 1.170 | 6.865 | 169.85      | 142.17      | 0.389 |

|                  |             |        |         |              |            |        |       |           |       |       |             |             |       |
|------------------|-------------|--------|---------|--------------|------------|--------|-------|-----------|-------|-------|-------------|-------------|-------|
|                  | BCC         |        |         | 86           |            |        |       | 5         |       |       | 3           | 6           |       |
| CoCrFeNiCuAl2    | FCC+<br>BCC | 14.532 | -5.224  | 1530.2<br>34 | 4.256      | 12.844 | 6.257 | 7.14<br>3 | 1.170 | 6.746 | 167.00<br>0 | 140.28<br>6 | 0.371 |
| CoCrFeNiCuAl2.3  | BCC         | 14.345 | -5.277  | 1505.7<br>10 | 4.093      | 12.980 | 6.403 | 6.97<br>3 | 1.170 | 6.579 | 163.01<br>4 | 137.64<br>4 | 0.350 |
| CoCrFeNiCuAl2.5  | BCC         | 14.213 | -5.298  | 1490.4<br>50 | 3.998      | 13.046 | 6.478 | 6.86<br>7 | 1.170 | 6.475 | 160.53<br>3 | 136.00<br>0 | 0.339 |
| CoCrFeNiCuAl2.8  | BCC         | 14.005 | -5.312  | 1469.0<br>28 | 3.873      | 13.117 | 6.566 | 6.71<br>8 | 1.170 | 6.330 | 157.05<br>1 | 133.69<br>2 | 0.325 |
| CoCrFeNiCuAl3    | BCC         | 13.863 | -5.313  | 1455.6<br>39 | 3.799      | 13.148 | 6.610 | 6.62<br>5 | 1.170 | 6.239 | 154.87<br>5 | 132.25<br>0 | 0.317 |
| CoCrFeNiCuAlSi   | FCC+<br>BCC | 16.178 | -18.857 | 1637.8<br>81 | 1.405      | 11.585 | 6.126 | 7.28<br>6 | 1.265 | 6.693 | 163.71<br>4 | 143.71<br>4 | 0.431 |
| CoCrFeNiCuAlV    | FCC+<br>BCC | 16.178 | -7.755  | 1708.7<br>39 | 3.565      | 12.500 | 4.954 | 7.42<br>9 | 1.169 | 7.233 | 175.28<br>6 | 152.28<br>6 | 0.659 |
| CoCrFeNiMnCu     | FCC         | 14.897 | 1.444   | 1727.2<br>83 | 17.81<br>4 | 13.582 | 2.997 | 8.50<br>0 | 1.096 | 8.212 | 204.50<br>0 | 158.33<br>3 | 1.659 |
| CoCrFeNiMo0.3    | FCC         | 12.825 | -4.154  | 1943.2<br>09 | 6.000      | 12.728 | 2.378 | 8.09<br>3 | 1.107 | 8.360 | 232.02<br>3 | 176.51<br>2 | 2.269 |
| CoCrFeNiPd       | FCC         | 13.381 | -5.600  | 1863.0<br>00 | 4.452      | 17.488 | 4.040 | 8.60<br>0 | 1.118 | 8.978 | 204.00<br>0 | 174.00<br>0 | 0.820 |
| CoCrFeNiPd2      | FCC         | 12.976 | -6.111  | 1857.1<br>67 | 3.943      | 19.576 | 4.695 | 8.83<br>3 | 1.118 | 9.482 | 190.16<br>7 | 175.00<br>0 | 0.589 |
| CoCrFeNiTi       | FCC         | 13.381 | -16.320 | 1885.6<br>00 | 1.546      | 14.151 | 6.681 | 7.40<br>0 | 1.197 | 7.484 | 203.00<br>0 | 160.00<br>0 | 0.300 |
| CoCrMnNi         | FCC         | 11.526 | -5.500  | 1798.7<br>50 | 3.769      | 15.050 | 3.447 | 8.00<br>0 | 1.091 | 8.110 | 221.50<br>0 | 160.00<br>0 | 0.970 |
| CoCrNiCu0.5Al    | BCC         | 13.145 | -8.000  | 1619.6<br>27 | 2.661      | 13.115 | 5.805 | 7.44<br>4 | 1.164 | 7.150 | 182.88<br>9 | 148.00<br>0 | 0.390 |
| CoCrNiCuAl       | FCC+<br>BCC | 13.381 | -6.560  | 1593.4<br>34 | 3.250      | 12.952 | 5.524 | 7.80<br>0 | 1.164 | 7.330 | 177.60<br>0 | 147.20<br>0 | 0.438 |
| CoCuFeMnNi       | FCC         | 13.381 | 1.760   | 1636.7<br>40 | 12.44<br>4 | 13.485 | 3.179 | 9.00<br>0 | 1.096 | 8.416 | 189.60<br>0 | 158.00<br>0 | 1.324 |
| CoCuFeMnNiSn0.03 | FCC         | 13.604 | 1.772   | 1629.9<br>91 | 12.51<br>2 | 13.491 | 3.794 | 8.97<br>0 | 1.343 | 8.400 | 188.76<br>7 | 157.40<br>4 | 0.945 |
| CoCuFeNiSn0.02   | FCC         | 11.729 | 5.020   | 1660.3<br>98 | 3.880      | 3.126  | 2.344 | 9.47<br>3 | 1.343 | 8.648 | 186.81<br>6 | 166.95<br>5 | 2.134 |

|                              |             |        |         |              |            |        |       |           |       |        |             |             |       |
|------------------------------|-------------|--------|---------|--------------|------------|--------|-------|-----------|-------|--------|-------------|-------------|-------|
| CoCuNiAl                     | FCC+<br>BCC | 11.526 | -8.000  | 1446.7<br>93 | 2.084      | 12.460 | 5.852 | 8.25<br>0 | 1.164 | 7.365  | 152.25<br>0 | 144.00<br>0 | 0.337 |
| CoFeMnNi                     | FCC         | 11.526 | -4.000  | 1706.5<br>00 | 4.917      | 14.289 | 3.551 | 8.50<br>0 | 1.096 | 8.282  | 204.50<br>0 | 162.50<br>0 | 0.914 |
| CoFeNiCuV                    | FCC         | 13.381 | -2.240  | 1769.5<br>40 | 10.57<br>1 | 10.373 | 2.203 | 8.60<br>0 | 1.066 | 8.151  | 175.60<br>0 | 166.00<br>0 | 2.756 |
| CoFeNiSi0.25                 | FCC         | 10.686 | -11.834 | 1762.6<br>92 | 1.592      | 3.249  | 2.025 | 8.61<br>5 | 1.091 | 8.086  | 194.38<br>5 | 170.76<br>9 | 2.605 |
| CoFeNiV                      | FCC         | 11.526 | -10.500 | 1872.5<br>00 | 2.055      | 10.917 | 2.415 | 8.00<br>0 | 1.066 | 7.951  | 187.00<br>0 | 172.50<br>0 | 1.976 |
| CoMnNi                       | FCC         | 9.134  | -5.778  | 1671.6<br>67 | 2.643      | 16.310 | 3.735 | 8.66<br>7 | 1.091 | 8.417  | 202.33<br>3 | 160.00<br>0 | 0.655 |
| CrCuFeMnNi                   | FCC+<br>BCC | 13.381 | 2.720   | 1719.1<br>40 | 8.457      | 14.184 | 3.198 | 8.40<br>0 | 1.096 | 8.072  | 203.60<br>0 | 154.00<br>0 | 1.309 |
| CrCuFeMoNi                   | FCC         | 13.381 | 4.640   | 1994.5<br>40 | 5.752      | 16.117 | 3.580 | 8.20<br>0 | 1.107 | 8.626  | 229.80<br>0 | 176.00<br>0 | 1.044 |
| CuNiAl                       | FCC+<br>BCC | 9.134  | -8.444  | 1339.7<br>23 | 1.449      | 13.912 | 6.157 | 8.00<br>0 | 1.163 | 6.850  | 133.33<br>3 | 132.00<br>0 | 0.241 |
| CuFe0.75Ti1.125NiAl1.1<br>25 | FCC         | 13.299 | -19.955 | 1535.5<br>46 | 1.023      | 15.777 | 7.168 | 6.97<br>5 | 1.194 | 6.378  | 139.50<br>0 | 131.35<br>0 | 0.259 |
| FeMnNi                       | FCC         | 9.134  | -4.444  | 1686.0<br>00 | 3.465      | 15.434 | 3.929 | 8.33<br>3 | 1.095 | 8.073  | 203.00<br>0 | 156.66<br>7 | 0.592 |
| FeCoNiCrMn                   | FCC         | 13.381 | -4.160  | 1801.2<br>00 | 5.794      | 13.836 | 3.269 | 8.00<br>0 | 1.096 | 8.064  | 219.40<br>0 | 162.00<br>0 | 1.252 |
| Hf0.5Nb0.5Ta0.5Ti1.5Zr       | BCC         | 12.423 | -1.500  | 2328.1<br>25 | 19.28<br>1 | 11.169 | 4.788 | 4.25<br>0 | 1.132 | 8.145  | 106.62<br>5 | 119.00<br>0 | 0.542 |
| HfMo0.75NbTaTiZr             | BCC         | 14.855 | -1.301  | 2571.6<br>52 | 29.37<br>3 | 26.209 | 5.653 | 4.60<br>9 | 1.191 | 9.957  | 139.08<br>7 | 144.95<br>7 | 0.465 |
| HfMoNbTaTiZr                 | BCC         | 14.897 | -1.889  | 2585.1<br>67 | 20.38<br>8 | 28.440 | 5.783 | 4.66<br>7 | 1.191 | 9.967  | 147.00<br>0 | 148.50<br>0 | 0.445 |
| HfMoNbZrTi                   | BCC         | 13.381 | -3.040  | 2444.2<br>00 | 10.75<br>8 | 30.955 | 6.097 | 4.60<br>0 | 1.190 | 8.620  | 139.20<br>0 | 138.20<br>0 | 0.360 |
| HfMoTaTiZr                   | BCC         | 13.381 | -3.360  | 2552.2<br>00 | 10.16<br>4 | 31.123 | 6.088 | 4.60<br>0 | 1.190 | 10.246 | 155.40<br>0 | 144.20<br>0 | 0.361 |
| HfNbTaZr                     | BCC         | 11.526 | 3.500   | 2668.5<br>00 | 8.787      | 12.316 | 5.363 | 4.50<br>0 | 1.132 | 11.268 | 109.25<br>0 | 137.75<br>0 | 0.401 |
| Mn2Cr2Fe2Ni2Cu               | FCC         | 13.145 | 2.568   | 1759.3       | 9.006      | 14.237 | 3.369 | 8.11      | 1.096 | 7.974  | 211.77      | 155.55      | 1.158 |

|                                                                   |             |        |        | 00           |            |        |       | 1         |       |       | 8           | 6           |       |
|-------------------------------------------------------------------|-------------|--------|--------|--------------|------------|--------|-------|-----------|-------|-------|-------------|-------------|-------|
| Mn <sub>2</sub> CrFe <sub>2</sub> NiCu <sub>2</sub>               | FCC+<br>BCC | 12.966 | 3.125  | 1660.4<br>25 | 6.889      | 14.551 | 3.381 | 8.50<br>0 | 1.096 | 8.078 | 194.62<br>5 | 150.00<br>0 | 1.134 |
| Mn <sub>2</sub> CrFeNi <sub>2</sub> Cu                            | FCC         | 12.885 | 0.735  | 1691.8<br>14 | 29.67<br>1 | 15.477 | 3.568 | 8.42<br>9 | 1.096 | 8.100 | 202.28<br>6 | 152.85<br>7 | 1.012 |
| MnCr <sub>2</sub> Fe <sub>2</sub> Ni <sub>2</sub> Cu <sub>2</sub> | FCC+<br>BCC | 13.145 | 4.741  | 1741.3<br>78 | 4.829      | 12.799 | 2.629 | 8.55<br>6 | 1.096 | 8.143 | 204.22<br>2 | 157.77<br>8 | 1.902 |
| MnCr <sub>2</sub> Fe <sub>2</sub> NiCu                            | FCC+<br>BCC | 12.885 | 5.061  | 1798.1<br>00 | 4.578      | 12.870 | 2.900 | 8.00<br>0 | 1.096 | 7.919 | 215.42<br>9 | 157.14<br>3 | 1.532 |
| MnCrFe <sub>1.5</sub> Ni <sub>0.5</sub> Al <sub>0.3</sub>         | BCC         | 12.319 | -6.501 | 1758.0<br>33 | 3.332      | 12.969 | 4.703 | 7.18<br>6 | 1.168 | 7.373 | 212.67<br>4 | 150.65<br>1 | 0.557 |
| MnCrFe <sub>1.5</sub> Ni <sub>0.5</sub> Al <sub>0.5</sub>         | BCC         | 12.662 | -8.049 | 1721.3<br>86 | 2.708      | 12.876 | 5.163 | 7.00<br>0 | 1.168 | 7.164 | 206.33<br>3 | 147.33<br>3 | 0.475 |
| MnCrFe <sub>2</sub> Ni <sub>2</sub> Cu <sub>2</sub>               | FCC         | 12.966 | 5.250  | 1686.5<br>50 | 4.165      | 12.604 | 2.748 | 8.87<br>5 | 1.096 | 8.263 | 194.87<br>5 | 157.50<br>0 | 1.717 |
| MnCrFeNiCu                                                        | FCC+<br>BCC | 13.381 | 2.720  | 1719.1<br>40 | 8.457      | 14.184 | 3.198 | 8.40<br>0 | 1.096 | 8.072 | 203.60<br>0 | 154.00<br>0 | 1.309 |
| MnCrFeNiCuAl                                                      | BCC         | 14.897 | -5.111 | 1588.1<br>95 | 4.629      | 14.256 | 5.388 | 7.50<br>0 | 1.169 | 7.175 | 181.33<br>3 | 141.00<br>0 | 0.513 |
| MoNbTiV                                                           | BCC         | 11.526 | -2.750 | 2442.5<br>00 | 10.23<br>7 | 24.894 | 4.076 | 5.00<br>0 | 1.120 | 7.351 | 169.50<br>0 | 167.50<br>0 | 0.694 |
| Mo <sub>0.3</sub> NbTiVZr                                         | BCC         | 12.825 | -3.202 | 2295.5<br>35 | 9.195      | 19.732 | 7.007 | 4.60<br>5 | 1.238 | 6.689 | 119.93<br>0 | 134.88<br>4 | 0.261 |
| Mo <sub>0.5</sub> NbTiVZr                                         | BCC         | 13.145 | -3.556 | 2322.2<br>22 | 8.585      | 22.809 | 6.969 | 4.66<br>7 | 1.238 | 6.845 | 129.22<br>2 | 139.11<br>1 | 0.271 |
| Mo <sub>0.7</sub> NbTiVZr                                         | BCC         | 13.308 | -3.839 | 2346.6<br>38 | 8.135      | 25.058 | 6.926 | 4.72<br>3 | 1.238 | 6.988 | 137.72<br>3 | 142.97<br>9 | 0.277 |
| Mo <sub>1.3</sub> NbTiVZr                                         | BCC         | 13.330 | -4.386 | 2408.8<br>30 | 7.321      | 29.155 | 6.775 | 4.86<br>8 | 1.238 | 7.352 | 159.37<br>7 | 152.83<br>0 | 0.290 |
| Mo <sub>1.5</sub> NbTiVZr                                         | BCC         | 13.254 | -4.496 | 2426.5<br>45 | 7.154      | 29.993 | 6.721 | 4.90<br>9 | 1.238 | 7.455 | 165.54<br>5 | 155.63<br>6 | 0.293 |
| Mo <sub>1.7</sub> NbTiVZr                                         | BCC         | 13.154 | -4.580 | 2443.0<br>18 | 7.017      | 30.663 | 6.665 | 4.94<br>7 | 1.238 | 7.551 | 171.28<br>1 | 158.24<br>6 | 0.296 |
| Mo <sub>2</sub> NbTiVZr                                           | BCC         | 12.976 | -4.667 | 2465.6<br>67 | 6.856      | 31.425 | 6.582 | 5.00<br>0 | 1.238 | 7.684 | 179.16<br>7 | 161.83<br>3 | 0.300 |
| MoCrFeNiCu                                                        | FCC         | 13.381 | 4.640  | 1994.5<br>40 | 5.752      | 16.117 | 3.580 | 8.20<br>0 | 1.107 | 8.626 | 229.80<br>0 | 176.00<br>0 | 1.044 |

|                     |     |        |         |              |            |        |       |           |       |        |             |             |       |
|---------------------|-----|--------|---------|--------------|------------|--------|-------|-----------|-------|--------|-------------|-------------|-------|
| MoNbTiV0.25Zr       | BCC | 12.708 | -4.595  | 2414.2<br>94 | 6.677      | 29.786 | 6.316 | 4.76<br>5 | 1.238 | 7.371  | 152.94<br>1 | 146.11<br>8 | 0.319 |
| MoNbTiV0.50Zr       | BCC | 13.145 | -4.444  | 2401.4<br>44 | 7.103      | 28.952 | 6.554 | 4.77<br>8 | 1.238 | 7.300  | 151.55<br>6 | 146.88<br>9 | 0.306 |
| MoNbTiV0.75Zr       | BCC | 13.332 | -4.299  | 2389.9<br>47 | 7.411      | 28.186 | 6.728 | 4.78<br>9 | 1.238 | 7.237  | 150.31<br>6 | 147.57<br>9 | 0.295 |
| MoNbTiV1.0Zr        | BCC | 13.381 | -4.160  | 2379.6<br>00 | 7.654      | 27.477 | 6.853 | 4.80<br>0 | 1.238 | 7.181  | 149.20<br>0 | 148.20<br>0 | 0.285 |
| MoNbTiV1.5Zr        | BCC | 13.254 | -3.901  | 2361.7<br>27 | 8.024      | 26.205 | 7.006 | 4.81<br>8 | 1.238 | 7.083  | 147.27<br>3 | 149.27<br>3 | 0.270 |
| MoNbTiV2.0Zr        | BCC | 12.976 | -3.667  | 2346.8<br>33 | 8.305      | 25.096 | 7.071 | 4.83<br>3 | 1.238 | 7.001  | 145.66<br>7 | 150.16<br>7 | 0.260 |
| MoNbTiV3.0Zr        | BCC | 12.264 | -3.265  | 2323.4<br>29 | 8.726      | 23.243 | 7.059 | 4.85<br>7 | 1.238 | 6.873  | 143.14<br>3 | 151.57<br>1 | 0.246 |
| MoNbTiZr            | BCC | 11.526 | -4.750  | 2428.7<br>50 | 5.893      | 30.695 | 5.988 | 4.75<br>0 | 1.192 | 7.450  | 154.50<br>0 | 145.25<br>0 | 0.321 |
| NbTaVW              | BCC | 11.526 | -4.250  | 2979.5<br>00 | 8.080      | 34.259 | 3.432 | 5.25<br>0 | 1.093 | 12.648 | 207.50<br>0 | 210.00<br>0 | 0.978 |
| NbTiV0.3Mo          | BCC | 10.836 | -2.241  | 2497.5<br>45 | 12.07<br>9 | 26.910 | 3.477 | 5.00<br>0 | 1.120 | 7.615  | 178.30<br>3 | 169.09<br>1 | 0.896 |
| NbTiV0.3Mo0.3       | BCC | 10.254 | -1.124  | 2390.2<br>69 | 21.80<br>1 | 18.881 | 3.398 | 4.73<br>1 | 1.120 | 6.920  | 137.73<br>1 | 152.69<br>2 | 0.888 |
| NbTiV0.3Mo0.5       | BCC | 10.662 | -1.582  | 2426.3<br>93 | 16.35<br>6 | 22.515 | 3.449 | 4.82<br>1 | 1.120 | 7.154  | 151.39<br>3 | 158.21<br>4 | 0.896 |
| NbTiV0.3Mo0.7       | BCC | 10.827 | -1.911  | 2457.7<br>00 | 13.92<br>3 | 24.808 | 3.473 | 4.90<br>0 | 1.120 | 7.357  | 163.23<br>3 | 163.00<br>0 | 0.897 |
| NbTiV0.3Mo1.3       | BCC | 10.696 | -2.438  | 2530.7<br>50 | 11.10<br>2 | 28.099 | 3.458 | 5.08<br>3 | 1.120 | 7.831  | 190.86<br>1 | 174.16<br>7 | 0.895 |
| NbTiV0.3Mo1.5       | BCC | 10.559 | -2.521  | 2549.9<br>74 | 10.68<br>1 | 28.583 | 3.436 | 5.13<br>2 | 1.120 | 7.955  | 198.13<br>2 | 177.10<br>5 | 0.894 |
| NbTiV0.3Zr          | BCC | 10.836 | -1.873  | 2264.8<br>18 | 13.10<br>1 | 11.748 | 6.005 | 4.39<br>4 | 1.237 | 6.494  | 99.212      | 120.90<br>9 | 0.301 |
| NbTiV2Zr            | BCC | 11.076 | -2.720  | 2237.0<br>00 | 9.109      | 11.289 | 7.481 | 4.60<br>0 | 1.237 | 6.361  | 109.00<br>0 | 134.20<br>0 | 0.198 |
| NbTiVZr             | BCC | 11.526 | -2.500  | 2250.5<br>00 | 10.37<br>5 | 11.715 | 7.048 | 4.50<br>0 | 1.237 | 6.426  | 104.25<br>0 | 127.75<br>0 | 0.232 |
| Ti0.5Co1.5CrFeNi1.5 | FCC | 12.858 | -16.364 | 1855.5       | 1.458      | 12.187 | 4.885 | 8.09      | 1.197 | 8.012  | 211.18      | 168.18      | 0.539 |

|                                       |                     |               |                |                      |                    |               |              |                   |              |              |                     |                     |              |
|---------------------------------------|---------------------|---------------|----------------|----------------------|--------------------|---------------|--------------|-------------------|--------------|--------------|---------------------|---------------------|--------------|
|                                       |                     |               |                | 45                   |                    |               |              | 1                 |              |              | 2                   | 2                   |              |
| <b>Ti0.5Co1.5CrFeNi1.5Mo<br/>0.1</b>  | <b>FCC</b>          | <b>13.374</b> | <b>-16.027</b> | <b>1874.1<br/>25</b> | <b>1.564</b>       | <b>12.945</b> | <b>4.938</b> | <b>8.05<br/>4</b> | <b>1.196</b> | <b>8.051</b> | <b>213.28<br/>6</b> | <b>169.28<br/>6</b> | <b>0.548</b> |
| <b>Ti0.5Co1.5CrFeNiAl</b>             | <b>FCC+<br/>BCC</b> | <b>14.534</b> | <b>-21.611</b> | <b>1712.4<br/>95</b> | <b>1.152</b>       | <b>13.256</b> | <b>6.536</b> | <b>7.08<br/>3</b> | <b>1.195</b> | <b>7.050</b> | <b>188.58<br/>3</b> | <b>151.83<br/>3</b> | <b>0.340</b> |
| <b>Ti0.5Co2CrFeNiAl</b>               | <b>FCC+<br/>BCC</b> | <b>14.232</b> | <b>-20.355</b> | <b>1716.7<br/>65</b> | <b>1.200</b>       | <b>13.089</b> | <b>6.364</b> | <b>7.23<br/>1</b> | <b>1.195</b> | <b>7.193</b> | <b>190.15<br/>4</b> | <b>154.00<br/>0</b> | <b>0.351</b> |
| <b>Ti0.5Co3CrFeNiAl</b>               | <b>FCC+<br/>BCC</b> | <b>13.483</b> | <b>-18.204</b> | <b>1723.5<br/>96</b> | <b>1.277</b>       | <b>12.694</b> | <b>6.050</b> | <b>7.46<br/>7</b> | <b>1.195</b> | <b>7.422</b> | <b>192.66<br/>7</b> | <b>157.46<br/>7</b> | <b>0.368</b> |
| <b>Ti0.5CoCrFeNiCu0.75Al<br/>0.25</b> | <b>FCC</b>          | <b>15.547</b> | <b>-15.645</b> | <b>1765.2<br/>99</b> | <b>1.754</b>       | <b>12.737</b> | <b>5.459</b> | <b>8.00<br/>0</b> | <b>1.196</b> | <b>7.735</b> | <b>194.90<br/>9</b> | <b>158.00<br/>0</b> | <b>0.522</b> |
| <b>TiVNbMo</b>                        | <b>BCC</b>          | <b>11.526</b> | <b>-2.750</b>  | <b>2442.5<br/>00</b> | <b>10.23<br/>7</b> | <b>24.894</b> | <b>4.076</b> | <b>5.00<br/>0</b> | <b>1.120</b> | <b>7.351</b> | <b>169.50<br/>0</b> | <b>167.50<br/>0</b> | <b>0.694</b> |
| <b>TiCoCrFeNiCuAlV</b>                | <b>FCC+<br/>BCC</b> | <b>17.288</b> | <b>-13.938</b> | <b>1737.7<br/>71</b> | <b>2.156</b>       | <b>14.027</b> | <b>6.338</b> | <b>7.00<br/>0</b> | <b>1.196</b> | <b>6.895</b> | <b>167.87<br/>5</b> | <b>147.00<br/>0</b> | <b>0.430</b> |
| <b>TiCr0.5FeNiCuAl</b>                | <b>FCC+<br/>BCC</b> | <b>14.697</b> | <b>-13.620</b> | <b>1611.1<br/>22</b> | <b>1.739</b>       | <b>14.909</b> | <b>7.099</b> | <b>7.09<br/>1</b> | <b>1.195</b> | <b>6.646</b> | <b>157.54<br/>5</b> | <b>137.45<br/>5</b> | <b>0.292</b> |
| <b>TiCr1.5FeNiCuAl</b>                | <b>FCC+<br/>BCC</b> | <b>14.784</b> | <b>-13.538</b> | <b>1698.6<br/>42</b> | <b>1.855</b>       | <b>14.086</b> | <b>6.905</b> | <b>6.92<br/>3</b> | <b>1.195</b> | <b>6.730</b> | <b>176.23<br/>1</b> | <b>140.92<br/>3</b> | <b>0.310</b> |
| <b>TiCr2FeNiCuAl</b>                  | <b>FCC+<br/>BCC</b> | <b>14.532</b> | <b>-13.306</b> | <b>1733.0<br/>24</b> | <b>1.893</b>       | <b>13.711</b> | <b>6.794</b> | <b>6.85<br/>7</b> | <b>1.195</b> | <b>6.763</b> | <b>183.57<br/>1</b> | <b>142.28<br/>6</b> | <b>0.315</b> |
| <b>TiCr3FeNiCuAl</b>                  | <b>FCC+<br/>BCC</b> | <b>13.863</b> | <b>-12.688</b> | <b>1788.8<br/>96</b> | <b>1.955</b>       | <b>13.033</b> | <b>6.566</b> | <b>6.75<br/>0</b> | <b>1.195</b> | <b>6.816</b> | <b>195.50<br/>0</b> | <b>144.50<br/>0</b> | <b>0.322</b> |
| <b>TiCrFeNiCuAl</b>                   | <b>FCC+<br/>BCC</b> | <b>14.897</b> | <b>-13.667</b> | <b>1658.5<br/>28</b> | <b>1.808</b>       | <b>14.485</b> | <b>7.009</b> | <b>7.00<br/>0</b> | <b>1.195</b> | <b>6.692</b> | <b>167.66<br/>7</b> | <b>139.33<br/>3</b> | <b>0.303</b> |

Data S3 The data source for Figure 2

| MPEAs                      | Dimension 1 | Dimension 2 | Phase   |
|----------------------------|-------------|-------------|---------|
| Al0.10CoCrFeMnNi           | -11.624     | -5.184      | FCC     |
| Al0.20CoCrFeMnNi           | -11.219     | -4.956      | FCC     |
| Al0.25CoCrCu0.5FeNiTi0.5   | -8.205      | 6.300       | FCC     |
| Al0.25CoCrCu0.75FeNiTi0.5  | -8.600      | 6.690       | FCC     |
| Al0.25CoCrFeNi             | -12.095     | -4.180      | FCC     |
| Al0.25CoFeNi               | -9.482      | -5.438      | FCC     |
| Al0.25MoNbTiV              | 21.718      | 9.960       | BCC     |
| Al0.25NbTaTiV              | 17.818      | 5.381       | BCC     |
| Al0.2Co1.5CrFeNi1.5Ti0.5   | -10.670     | -0.585      | FCC     |
| Al0.375CoCrFeNi            | -10.904     | -3.390      | FCC     |
| Al0.38CoCrFeMnNi           | -9.177      | 0.453       | FCC     |
| Al0.3CoCrCuFe              | -10.228     | -9.226      | FCC     |
| Al0.3CrFe1.5MnNi0.5        | -7.177      | -2.485      | FCC+BCC |
| Al0.3HfNbTaTiZr            | 18.285      | 6.727       | BCC     |
| Al0.3NbTa0.8Ti1.4V0.2Zr1.3 | 16.587      | 7.763       | BCC     |
| Al0.3NbTaTi1.4Zr1.3        | 17.216      | 6.605       | BCC     |
| Al0.43CoCrFeMnNi           | -9.053      | 0.814       | FCC+BCC |
| Al0.49CoCrFeMnNi           | -8.843      | 1.194       | FCC+BCC |
| Al0.4CrCuFeNi2             | -9.754      | -9.297      | FCC     |
| Al0.4Hf0.6NbTaTiZr         | 17.874      | 6.637       | BCC     |
| Al0.56CoCrFeMnNi           | -8.647      | 1.639       | FCC+BCC |
| Al0.5CoCrCu0.5FeNiTi0.5    | -6.907      | 6.950       | FCC+BCC |
| Al0.5CoCrCuFe              | -10.541     | -13.273     | FCC     |
| Al0.5CoCrCuFeNi            | -8.754      | -12.230     | FCC     |
| Al0.5CoCrCuFeNiTi          | -5.306      | 7.953       | FCC+BCC |
| Al0.5CoCrCuFeNiTi0.2       | -5.348      | -10.440     | FCC     |
| Al0.5CoCrCuFeNiTi0.4       | -8.541      | 7.326       | FCC     |
| Al0.5CoCrCuFeNiTi0.6       | -7.407      | 7.529       | FCC+BCC |
| Al0.5CoCrCuFeNiTi0.8       | -6.290      | 7.697       | FCC+BCC |
| Al0.5CoCrCuFeNiTi1.2       | -4.485      | 8.073       | FCC+BCC |
| Al0.5CoCrCuFeNiTi1.4       | -3.846      | 7.908       | FCC+BCC |
| Al0.5CoCrCuFeNiTi1.6       | -3.267      | 7.766       | FCC+BCC |
| Al0.5CoCrCuFeNiTi1.8       | -2.738      | 7.849       | FCC+BCC |
| Al0.5CoCrCuFeNiTi2         | -2.380      | 7.632       | FCC+BCC |
| Al0.5CoCrCuFeNiV0.2        | -7.689      | -12.417     | FCC     |
| Al0.5CoCrCuFeNiV0.4        | -6.791      | -12.967     | FCC+BCC |
| Al0.5CoCrCuFeNiV0.6        | -6.248      | -13.582     | FCC+BCC |
| Al0.5CoCrCuFeNiV0.8        | -6.397      | -14.258     | FCC+BCC |
| Al0.5CoCrCuFeNiV1.0        | -5.776      | -14.373     | FCC+BCC |
| Al0.5CoCrCuFeNiV1.2        | -6.743      | -15.179     | BCC     |
| Al0.5CoCrCuFeNiV1.4        | -5.298      | -14.877     | BCC     |



|                           |         |         |         |
|---------------------------|---------|---------|---------|
| Al0.5CoCrCuFeNiV1.6       | -5.944  | -15.730 | BCC     |
| Al0.5CoCrCuFeNiV1.8       | -6.228  | -16.277 | BCC     |
| Al0.5CoCrCuFeNiV2.0       | -5.631  | -16.452 | BCC     |
| Al0.5CoCrFeNi             | -10.100 | -2.566  | FCC+BCC |
| Al0.5CoFeNi               | -8.894  | -4.752  | FCC+BCC |
| Al0.5CrCuFeNi2            | -9.650  | -8.717  | FCC     |
| Al0.5CrFe1.5MnNi0.5       | -6.445  | -2.000  | BCC     |
| Al0.5HfNbTaTiZr           | 17.947  | 6.873   | BCC     |
| Al0.5MoNbTiV              | 21.368  | 9.559   | BCC     |
| Al0.5NbTa0.8Ti1.5V0.2Zr   | 16.515  | 7.468   | BCC     |
| Al0.5NbTaTiV              | 17.457  | 5.438   | BCC     |
| Al0.62CoCrFeMnNi          | -8.416  | 2.001   | FCC+BCC |
| Al0.68CoCrFeMnNi          | -8.303  | 2.411   | FCC+BCC |
| Al0.6CrCuFeNi2            | -9.393  | -8.315  | FCC     |
| Al0.75CoCrCu0.25FeNiTi0.5 | -4.682  | 7.094   | FCC+BCC |
| Al0.75CoCrFeMnNi          | -8.134  | 2.873   | FCC+BCC |
| Al0.75CoCrFeNi            | -6.377  | -0.033  | FCC+BCC |
| Al0.75CoFeNi              | -12.957 | 0.679   | FCC+BCC |
| Al0.75HfNbTaTiZr          | 17.721  | 7.039   | BCC     |
| Al0.75MoNbTiV             | 21.150  | 9.301   | BCC     |
| Al0.7Co0.3CrFeNi          | -5.278  | -0.380  | FCC+BCC |
| Al0.81CoCrFeMnNi          | -7.632  | 2.717   | FCC+BCC |
| Al0.875CoCrFeNi           | -5.466  | 0.480   | FCC+BCC |
| Al0.88CoCrFeMnNi          | -7.445  | 3.147   | FCC+BCC |
| Al0.8CoCrCuFe             | -1.931  | -11.425 | FCC+BCC |
| Al0.8CoCrCuFeNi           | -4.141  | -9.703  | FCC+BCC |
| Al0.8CrCuFeNi2            | 0.349   | -9.805  | FCC     |
| Al0.95CoCrFeMnNi          | -7.054  | 3.227   | FCC+BCC |
| Al1.125CuFe0.75NiTi1.125  | 3.615   | 4.443   | FCC     |
| Al1.25CoCrFeMnNi          | -6.171  | 3.617   | BCC     |
| Al1.25CoCrFeNi            | -2.964  | 1.634   | BCC     |
| Al1.2CrCuFeNi2            | 1.827   | -8.975  | FCC+BCC |
| Al1.3CoCrCuFe             | 2.362   | -6.020  | FCC+BCC |
| Al1.3CoCrCuFeNi           | -1.409  | -6.750  | FCC+BCC |
| Al1.5CoCrCuFe             | 3.138   | -4.591  | FCC+BCC |
| Al1.5CoCrCuFeNi           | -0.654  | -5.583  | FCC+BCC |
| Al1.5CoCrFeNi             | -1.577  | 1.809   | BCC     |
| Al1.5CoCrFeNiTi           | 0.671   | 6.278   | BCC     |
| Al1.8CoCrCuFe             | 3.872   | -2.957  | FCC+BCC |
| Al1.8CoCrCuFeNi           | 0.543   | -3.978  | FCC+BCC |
| Al2.0CoCrCuFe             | 4.163   | -2.170  | FCC+BCC |
| Al2.0CrCuFeNi2            | 4.247   | -3.557  | BCC     |
| Al2.3CoCrCuFe             | 4.215   | -1.368  | FCC+BCC |

|                                             |         |         |         |
|---------------------------------------------|---------|---------|---------|
| Al <sub>2.3</sub> CoCrCuFeNi                | 1.705   | -2.416  | FCC+BCC |
| Al <sub>2.5</sub> CoCrCuFe                  | 4.357   | -0.915  | FCC+BCC |
| Al <sub>2.5</sub> CoCrCuFeNi                | 2.071   | -1.886  | FCC+BCC |
| Al <sub>2.5</sub> CoCrFeNi                  | 2.757   | 1.757   | BCC     |
| Al <sub>2.8</sub> CoCrCuFe                  | 4.204   | -0.320  | BCC     |
| Al <sub>2.8</sub> CoCrCuFeNi                | 2.522   | -1.337  | BCC     |
| Al <sub>2</sub> CoCrCuFeNi                  | 3.615   | 4.443   | FCC     |
| Al <sub>2</sub> CoCrFeMo <sub>0.5</sub> Ni  | 1.111   | -3.238  | FCC+BCC |
| Al <sub>2</sub> CoCrFeNi                    | -1.380  | 3.755   | BCC     |
| Al <sub>2</sub> CoCrFeNiTi                  | 1.656   | 1.741   | BCC     |
| Al <sub>3.0</sub> CoCrCuFe                  | 1.126   | 6.116   | BCC     |
| Al <sub>3</sub> CoCrCuFeNi                  | 4.560   | -0.128  | BCC     |
| Al <sub>3</sub> CoCrFeNi                    | 2.832   | -0.955  | BCC     |
| AlCo <sub>2</sub> CrFeMo <sub>0.5</sub> Ni  | 3.535   | 1.686   | BCC     |
| AlCoCrCuFe                                  | -10.014 | 2.009   | FCC+BCC |
| AlCoCrCuFeMnNi                              | 1.001   | -7.083  | FCC+BCC |
| AlCoCrCuFeNi                                | -4.387  | -7.631  | FCC+BCC |
| AlCoCrCuFeNiTi                              | -2.948  | -8.254  | FCC+BCC |
| AlCoCrCuFeNiV                               | -3.485  | 8.485   | FCC+BCC |
| AlCoCrCuNiTi                                | -3.432  | -13.893 | FCC+BCC |
| AlCoCrFeMo <sub>0.1</sub> Ni                | -1.486  | 7.187   | BCC     |
| AlCoCrFeMo <sub>0.5</sub> Ni <sub>1.5</sub> | -5.493  | 1.635   | BCC     |
| AlCoCrFeMo <sub>0.5</sub> Ni <sub>2</sub>   | -9.793  | 2.593   | FCC+BCC |
| AlCoCrFeNb <sub>0.1</sub> Ni                | -10.095 | 2.049   | FCC+BCC |
| AlCoCrFeNi                                  | -4.618  | 1.879   | BCC     |
| AlCoCrFeNiNb <sub>0.1</sub>                 | -4.558  | 0.884   | BCC     |
| AlCoCrFeNiSi                                | -4.617  | 1.880   | BCC     |
| AlCoCrFeNiSi <sub>0.2</sub>                 | 0.890   | 8.497   | BCC     |
| AlCoCrFeNiSi <sub>0.4</sub>                 | 0.243   | 9.791   | BCC     |
| AlCoCrFeNiSi <sub>0.6</sub>                 | 0.249   | 9.444   | BCC     |
| AlCoCrFeNiTi                                | 0.407   | 9.002   | BCC     |
| AlCoCrFeNiTi <sub>0.5</sub>                 | -0.205  | 6.040   | BCC     |
| AlCoCuFeNi                                  | -2.471  | 5.620   | BCC     |
| AlCoCuFeNiSi                                | 1.801   | -9.901  | FCC+BCC |
| AlCoCuFeNiTi                                | 3.529   | 5.515   | FCC+BCC |
| AlCoCuFeNiZr                                | 3.028   | 3.912   | FCC+BCC |
| AlCoFeNi                                    | 3.026   | 7.339   | FCC+BCC |
| AlCoFeNiTiVZr                               | 5.988   | 1.609   | BCC     |
| AlCr <sub>0.5</sub> NbTiV                   | 2.691   | 7.658   | BCC     |
| AlCrCuFeNi                                  | 15.397  | 5.984   | BCC     |
| AlCrCuFeNi <sub>0.6</sub>                   | 1.216   | -7.789  | FCC+BCC |
| AlCrCuFeNi <sub>0.8</sub>                   | 1.738   | -6.822  | FCC+BCC |
| AlCrCuFeNi <sub>1.2</sub>                   | 1.629   | -7.301  | FCC+BCC |

|                        |         |         |         |
|------------------------|---------|---------|---------|
| AlCrCuFeNi1.4          | 0.986   | -8.241  | FCC+BCC |
| AlCrCuFeNi2            | 0.995   | -8.664  | FCC+BCC |
| AlCrFeNi               | 0.979   | -9.411  | FCC+BCC |
| AlCrFeNiMo0.2          | -1.564  | 0.266   | BCC     |
| AlCrFeNiMo0.5          | -2.855  | 0.282   | BCC     |
| AlCuFeNiTi             | -3.552  | -0.308  | BCC     |
| AlCuNiTi               | 3.121   | 4.319   | FCC     |
| AlMo0.5NbTa0.5TiZr     | 4.464   | 3.917   | FCC     |
| AlMoNbTiV              | 18.951  | 8.346   | BCC     |
| AlNb1.5Ta0.5Ti1.5Zr0.5 | 21.003  | 9.136   | BCC     |
| AlNbTaTiV              | 16.169  | 5.791   | BCC     |
| AlNbTiV                | 16.858  | 5.505   | BCC     |
| Co0.5CrFeNiCuAl        | 15.577  | 5.593   | BCC     |
| Co1.5CrFeNi1.5Ti0.5    | -1.985  | -7.476  | FCC+BCC |
| CoCr0.5FeNiCuAl        | -11.093 | -1.631  | FCC     |
| CoCrCuFeNiTi           | -2.501  | -7.134  | FCC+BCC |
| CoCrCuFeNiTi0.5        | -7.972  | 6.757   | FCC     |
| CoCrFe0.5NiCuAl        | -6.293  | -10.479 | FCC     |
| CoCrFeMnNi             | -2.083  | -8.574  | FCC+BCC |
| CoCrFeMnNiV0.25        | -14.923 | -9.281  | FCC     |
| CoCrFeMnNiV0.5         | -15.513 | -9.447  | FCC     |
| CoCrFeNi0.5CuAl        | -15.722 | -9.468  | FCC     |
| CoCrFeNiAl             | -1.766  | -8.031  | FCC+BCC |
| CoCrFeNiAl0.25         | -4.558  | 0.884   | BCC     |
| CoCrFeNiAl0.375        | -12.045 | -3.942  | FCC     |
| CoCrFeNiAl0.3Mo0.1     | -10.988 | -3.097  | FCC     |
| CoCrFeNiAl0.5          | -11.566 | -3.537  | FCC     |
| CoCrFeNiAl0.75         | -10.101 | -2.376  | FCC+BCC |
| CoCrFeNiAl0.875        | -6.343  | 0.147   | FCC+BCC |
| CoCrFeNiAl1.25         | -5.517  | 0.623   | FCC+BCC |
| CoCrFeNiAl1.5          | -3.079  | 1.522   | BCC     |
| CoCrFeNiAl2            | -1.700  | 1.720   | BCC     |
| CoCrFeNiAl2.5          | 1.618   | 1.516   | BCC     |
| CoCrFeNiAl3            | 2.741   | 1.339   | BCC     |
| CoCrFeNiCu0.25Al       | 3.564   | 1.232   | BCC     |
| CoCrFeNiCu0.25Al0.75   | -1.970  | -9.582  | BCC     |
| CoCrFeNiCu0.5Al        | -3.045  | -10.183 | FCC+BCC |
| CoCrFeNiCu0.5Al0.5     | -2.366  | -9.070  | BCC     |
| CoCrFeNiCu0.75Al0.25   | -6.954  | -11.183 | FCC     |
| CoCrFeNiCuAl           | -10.164 | -11.092 | FCC     |
| CoCrFeNiCuAl0.3        | -2.948  | -8.254  | FCC+BCC |
| CoCrFeNiCuAl0.5        | -9.931  | -11.154 | FCC     |
| CoCrFeNiCuAl0.5V0.2    | -6.890  | -11.728 | FCC     |

|                          |         |         |         |
|--------------------------|---------|---------|---------|
| CoCrFeNiCuAl0.5V0.4      | -7.178  | -13.628 | FCC     |
| CoCrFeNiCuAl0.5V1.2      | -7.103  | -14.271 | FCC+BCC |
| CoCrFeNiCuAl0.5V1.4      | -6.146  | -15.021 | FCC+BCC |
| CoCrFeNiCuAl0.5V1.6      | -6.608  | -15.676 | FCC+BCC |
| CoCrFeNiCuAl0.5V1.8      | -5.548  | -15.391 | FCC+BCC |
| CoCrFeNiCuAl0.5V2        | -5.005  | -15.576 | FCC+BCC |
| CoCrFeNiCuAl0.8          | -5.167  | -16.127 | FCC+BCC |
| CoCrFeNiCuAl1.3          | -3.952  | -9.198  | FCC+BCC |
| CoCrFeNiCuAl1.5          | -1.293  | -7.273  | FCC+BCC |
| CoCrFeNiCuAl1.8          | -0.673  | -6.301  | FCC+BCC |
| CoCrFeNiCuAl2            | 0.590   | -4.893  | FCC+BCC |
| CoCrFeNiCuAl2.3          | 1.436   | -4.272  | FCC+BCC |
| CoCrFeNiCuAl2.5          | 2.153   | -3.585  | BCC     |
| CoCrFeNiCuAl2.8          | 2.577   | -3.146  | BCC     |
| CoCrFeNiCuAl3            | 2.982   | -2.575  | BCC     |
| CoCrFeNiCuAlSi           | 3.290   | -2.123  | BCC     |
| CoCrFeNiCuAlV            | -0.735  | 9.305   | FCC+BCC |
| CoCrFeNiMnCu             | -3.432  | -13.893 | FCC+BCC |
| CoCrFeNiMo0.3            | -14.922 | -9.276  | FCC     |
| CoCrFeNiPd               | -12.984 | -12.326 | FCC     |
| CoCrFeNiPd2              | -16.627 | -10.858 | FCC     |
| CoCrFeNiTi               | -15.088 | -6.145  | FCC     |
| CoCrMnNi                 | -15.101 | -5.968  | FCC     |
| CoCrNiCu0.5Al            | -4.377  | 3.540   | FCC     |
| CoCrNiCuAl               | -13.996 | -8.023  | FCC     |
| CoCuFeMnNi               | 2.465   | -8.416  | BCC     |
| CoCuFeMnNiSn0.03         | 1.645   | -8.800  | FCC+BCC |
| CoCuFeNiSn0.02           | -13.404 | -11.628 | FCC     |
| CoCuNiAl                 | -7.804  | -9.600  | FCC     |
| CoFeMnNi                 | -7.989  | -9.267  | FCC     |
| CoFeNiCuV                | -13.976 | 1.712   | FCC+BCC |
| CoFeNiSi0.25             | -13.770 | -7.959  | FCC     |
| CoFeNiV                  | -16.345 | -12.313 | FCC     |
| CoMnNi                   | -17.446 | -11.756 | FCC     |
| CrCuFeMnNi               | -17.335 | -11.559 | FCC     |
| CrCuFeMoNi               | -12.820 | -7.153  | FCC     |
| CuNiAl                   | -14.048 | -10.876 | FCC+BCC |
| CuFe0.75Ti1.125NiAl1.125 | -16.162 | -8.020  | FCC     |
| FeMnNi                   | 6.799   | -0.273  | FCC+BCC |
| FeCoNiCrMn               | -12.789 | -7.152  | FCC     |
| Hf0.5Nb0.5Ta0.5Ti1.5Zr   | 17.606  | 8.451   | BCC     |
| HfMo0.75NbTaTiZr         | 21.271  | 14.502  | BCC     |
| HfMoNbTaTiZr             | 21.003  | 14.287  | BCC     |

|                          |         |         |         |
|--------------------------|---------|---------|---------|
| HfMoNbZrTi               | 20.079  | 13.011  | BCC     |
| HfMoTaTiZr               | 20.328  | 13.621  | BCC     |
| HfNbTaZr                 | 19.198  | 6.319   | BCC     |
| Mn2Cr2Fe2Ni2Cu           | -14.056 | -10.210 | FCC     |
| Mn2CrFe2NiCu2            | -13.547 | -10.632 | FCC+BCC |
| Mn2CrFeNi2Cu             | -11.183 | -13.261 | FCC     |
| MnCr2Fe2Ni2Cu2           | -15.271 | -11.541 | FCC+BCC |
| MnCr2Fe2NiCu             | -15.048 | -10.768 | FCC+BCC |
| MnCrFe1.5Ni0.5Al0.3      | -7.173  | -2.386  | BCC     |
| MnCrFe1.5Ni0.5Al0.5      | -6.359  | -1.851  | BCC     |
| MnCrFe2Ni2Cu2            | -14.891 | -11.725 | FCC     |
| MnCrFeNiCu               | -14.048 | -10.876 | FCC+BCC |
| MnCrFeNiCuAl             | -1.814  | -6.249  | BCC     |
| MoNbTiV                  | 17.183  | 10.919  | BCC     |
| Mo0.3NbTiVZr             | 17.540  | 11.525  | BCC     |
| Mo0.5NbTiVZr             | 17.630  | 12.156  | BCC     |
| Mo0.7NbTiVZr             | 18.236  | 13.452  | BCC     |
| Mo1.3NbTiVZr             | 18.956  | 13.342  | BCC     |
| Mo1.5NbTiVZr             | 19.013  | 13.703  | BCC     |
| Mo1.7NbTiVZr             | 18.714  | 14.116  | BCC     |
| Mo2NbTiVZr               | -16.162 | -8.020  | FCC     |
| MoCrFeNiCu               | 22.448  | 10.660  | BCC     |
| MoNbTiV0.25Zr            | 19.223  | 12.650  | BCC     |
| MoNbTiV0.50Zr            | 18.987  | 12.322  | BCC     |
| MoNbTiV0.75Zr            | 18.594  | 12.676  | BCC     |
| MoNbTiV1.0Zr             | 18.145  | 12.842  | BCC     |
| MoNbTiV1.5Zr             | 17.714  | 12.787  | BCC     |
| MoNbTiV2.0Zr             | 18.294  | 12.048  | BCC     |
| MoNbTiV3.0Zr             | 18.363  | 11.558  | BCC     |
| MoNbTiZr                 | 19.821  | 12.027  | BCC     |
| NbTaVW                   | 22.448  | 10.660  | BCC     |
| NbTiV0.3Mo               | 24.658  | 10.324  | BCC     |
| NbTiV0.3Mo0.3            | 23.173  | 10.867  | BCC     |
| NbTiV0.3Mo0.5            | 22.908  | 12.180  | BCC     |
| NbTiV0.3Mo0.7            | 22.748  | 11.712  | BCC     |
| NbTiV0.3Mo1.3            | 22.781  | 11.285  | BCC     |
| NbTiV0.3Mo1.5            | 23.434  | 10.508  | BCC     |
| NbTiV0.3Zr               | 23.683  | 10.549  | BCC     |
| NbTiV2Zr                 | 16.347  | 9.493   | BCC     |
| NbTiVZr                  | 16.233  | 9.953   | BCC     |
| Ti0.5Co1.5CrFeNi1.5      | 16.328  | 9.772   | BCC     |
| Ti0.5Co1.5CrFeNi1.5Mo0.1 | -11.484 | -1.018  | FCC     |
| Ti0.5Co1.5CrFeNiAl       | -11.396 | -0.853  | FCC     |

|                                  |               |              |                |
|----------------------------------|---------------|--------------|----------------|
| <b>Ti0.5Co2CrFeNiAl</b>          | <b>-2.983</b> | <b>5.267</b> | <b>FCC+BCC</b> |
| <b>Ti0.5Co3CrFeNiAl</b>          | <b>-3.318</b> | <b>4.862</b> | <b>FCC+BCC</b> |
| <b>Ti0.5CoCrFeNiCu0.75Al0.25</b> | <b>-4.000</b> | <b>3.770</b> | <b>FCC+BCC</b> |
| <b>TiVNbMo</b>                   | <b>-7.104</b> | <b>5.933</b> | <b>FCC</b>     |
| <b>TiCoCrFeNiCuAlV</b>           | <b>-3.835</b> | <b>9.295</b> | <b>FCC+BCC</b> |
| <b>TiCr0.5FeNiCuAl</b>           | <b>-0.649</b> | <b>6.979</b> | <b>FCC+BCC</b> |
| <b>TiCr1.5FeNiCuAl</b>           | <b>-1.600</b> | <b>6.283</b> | <b>FCC+BCC</b> |
| <b>TiCr2FeNiCuAl</b>             | <b>-1.592</b> | <b>5.460</b> | <b>FCC+BCC</b> |
| <b>TiCr3FeNiCuAl</b>             | <b>-2.374</b> | <b>3.170</b> | <b>FCC+BCC</b> |
| <b>TiCrFeNiCuAl</b>              | <b>-1.282</b> | <b>6.826</b> | <b>FCC+BCC</b> |

**Data S4. The data source of the yield strengths collected from experiments for various MPEAs. (separate file)**

The data set includes 53 entries derived from the experiments in the prior research. For each entry, we list the experimental and predicted yield strengths, the deviation between experiments and model prediction, and the corresponding references.

| MPEAs                                                                                      | Experimental yield stress (MPa) | Calculated yield stress (MPa) | Deviations (%) | References                                                                                                                                                                                                                       |
|--------------------------------------------------------------------------------------------|---------------------------------|-------------------------------|----------------|----------------------------------------------------------------------------------------------------------------------------------------------------------------------------------------------------------------------------------|
| Al <sub>0.25</sub> CoFeNi                                                                  | 158                             | 153                           | 3.164556962    | T.T. Zuo, R.B. Li, X.J. Ren, Y. Zhang, Effects of Al and Si addition on the structure and properties of CoFeNi equal atomic ratio alloy, <i>J. Magn. Magn. Mater.</i> 371 (2014) 60–68.                                          |
| Al <sub>0.38</sub> CoCrFeMnNi                                                              | 244                             | 208                           | 14.75409836    | He, J.Y., Liu, W.H., Wang, H., Wu, Y., Liu, X.J., Nieh, T.G., Lu, Z.P., 2014. Effects of Al addition on structural evolution and tensile properties of the FeCoNiCrMn high-entropy alloy system. <i>Acta Mater.</i> 62, 105-113. |
| Al <sub>0.3</sub> HfNbTaTiZr                                                               | 1188                            | 916                           | 22.8956229     | C.-M. Lin, C.-C. Juan, C.-H. Chang, C.-W. Tsai, J.-W. Yeh, Effect of Al addition on mechanical properties and microstructure of refractory Al <sub>x</sub> HfNbTaTiZr alloys, <i>J. Alloy. Compd.</i> 624 (2015) 100–107         |
| Al <sub>0.75</sub> HfNbTaTiZr                                                              | 1514                            | 1511                          | 0.198150594    |                                                                                                                                                                                                                                  |
| AlNb <sub>1.5</sub> Ta <sub>0.5</sub> Ti <sub>1.5</sub> Zr <sub>0.5</sub>                  | 1280                            | 1137                          | 11.171875      | O.N. Senkov, C. Woodward, D.B. Miracle, Microstructure and properties of aluminum-containing refractory high entropy alloys, <i>JOM</i> 66 (10) (2014) 2030–2042.                                                                |
| AlMo <sub>0.5</sub> NbTa <sub>0.5</sub> TiZr                                               | 2000                            | 1966                          | 1.7            |                                                                                                                                                                                                                                  |
| Al <sub>0.3</sub> NbTa <sub>0.8</sub> Ti <sub>1.4</sub> V <sub>0.2</sub> Zr <sub>1.3</sub> | 1965                            | 2010                          | 2.290076336    |                                                                                                                                                                                                                                  |

|                                   |             |             |                    |                                                                                                                                                                                                                                                                 |
|-----------------------------------|-------------|-------------|--------------------|-----------------------------------------------------------------------------------------------------------------------------------------------------------------------------------------------------------------------------------------------------------------|
| <b>Al<sub>0.5</sub>CoCrCuFeNi</b> | <b>388</b>  | <b>363</b>  | <b>6.443298969</b> | <b>Chen, M.R., Lin, S.J., Yeh, J.W., Chen, S.K., Huang, Y.S., Chuang, M.H., 2006. Effect of vanadium addition on the microstructure, hardness, and wear resistance of Al<sub>0.5</sub>CoCrCuFeNi high-entropy alloy. Metall. Mater. Trans. A 37, 1363-1369.</b> |
| <b>Al<sub>0.25</sub>MoNbTiV</b>   | <b>1250</b> | <b>1230</b> | <b>1.6</b>         | <b>Chen, S.Y., Yang, X., Dahmen, K.A., Liaw, P.K., Zhang, Y., 2014. Microstructures and crackling noise of Al<sub>x</sub>NbTiMoV high entropy alloys. Entropy 16, 870-884.</b>                                                                                  |
| <b>Al<sub>0.5</sub>MoNbTiV</b>    | <b>1625</b> | <b>1364</b> | <b>16.06153846</b> |                                                                                                                                                                                                                                                                 |
| <b>Al<sub>0.75</sub>MoNbTiV</b>   | <b>1260</b> | <b>1213</b> | <b>3.73015873</b>  |                                                                                                                                                                                                                                                                 |
| <b>AlMoNbTiV</b>                  | <b>1375</b> | <b>1413</b> | <b>2.763636364</b> |                                                                                                                                                                                                                                                                 |
| <b>AlCoCrFeMo<sub>0.1</sub>Ni</b> | <b>1804</b> | <b>1672</b> | <b>7.317073171</b> | <b>J.M. Zhu, H.M. Fu, H.F. Zhang, A.M. Wang, H. Li, Z.Q. Hua, Microstructures and compressive properties of multicomponent AlCoCrFeNiMox alloys, Mater. Sci. Eng. A 527 (2010) 6975–6979</b>                                                                    |
| <b>AlCoCrFeNb<sub>0.1</sub>Ni</b> | <b>1641</b> | <b>1643</b> | <b>0.121876904</b> | <b>S.G. Ma, Y. Zhang, Effect of Nb addition on the microstructure and properties of AlCoCrFeNi high-entropy alloy, Mater. Sci. Eng. A 532 (2012) 480–486</b>                                                                                                    |
| <b>AlCoCrFeNiTi</b>               | <b>1860</b> | <b>1595</b> | <b>14.24731183</b> | <b>Y.J. Zhou, Y. Zhang, Y.L. Wang, G.L. Chen, Solid solution alloys of AlCoCrFeNiTi<sub>x</sub> with excellent room-temperature mechanical properties, Cit.: Appl.</b>                                                                                          |



|                 |      |      |             |                                                                                                                                                                                                                                                                                                                                                   |
|-----------------|------|------|-------------|---------------------------------------------------------------------------------------------------------------------------------------------------------------------------------------------------------------------------------------------------------------------------------------------------------------------------------------------------|
|                 |      |      |             | Phys. Lett. 90 (2007) 181904.                                                                                                                                                                                                                                                                                                                     |
| AlCoCrFeNiTi0.5 | 2260 | 2058 | 8.938053097 | F.J. Wang, Y. Zhang, G.L. Chen, Atomic packing efficiency and phase transition in a high entropy alloy, J. Alloy. Compd. 478 (2009) 321–324                                                                                                                                                                                                       |
| AlCuFeNiTi      | 1074 | 899  | 16.29422719 | Fazakas, E., Zadorozhnyy, V., Louzguine-Luzgin, D.V., 2015. Effect of iron content on the structure and mechanical properties of Al <sub>25</sub> Ti <sub>25</sub> Ni <sub>25</sub> Cu <sub>25</sub> and (AlTi) <sub>60-x</sub> Ni <sub>20</sub> Cu <sub>20</sub> Fe <sub>x</sub> (x ¼15, 20) high-entropy alloys. Appl. Surf. Sci. 358, 549-555. |
| AlCuNiTi        | 300  | 281  | 6.333333333 |                                                                                                                                                                                                                                                                                                                                                   |
| CoCrCuFeNiTi    | 1272 | 944  | 25.78616352 | Wang, X.F., Zhang, Y., Qiao, Y., Chen, G.L., 2007. Novel microstructure and properties of multicomponent CoCrCuFeNiTi <sub>x</sub> alloys. Intermetallics 15, 357-362.                                                                                                                                                                            |
| CoCrCuFeNiTi0.5 | 700  | 545  | 22.14285714 |                                                                                                                                                                                                                                                                                                                                                   |
| CoCrFeMnNi      | 230  | 205  | 10.86956522 | Stepanov, N.D., Shaysultanov, D.G., Salishchev, G.A., Tikhonovsky, M.A., Oleynik, E.E., Tortika, A.S., Senkov, O.N., 2015. Effect of V content on microstructure and mechanical properties of the CoCrFeMnNiV <sub>x</sub> high entropy alloys. J. Alloy. Compd. 628, 170-185.                                                                    |
| CoCrFeMnNiV0.25 | 200  | 190  | 5           |                                                                                                                                                                                                                                                                                                                                                   |
| CoCrFeNi        | 148  | 176  | 18.91891892 | Wu, Z., Bei, H., Pharr, G.M., George, E.P., 2014. Temperature dependence of the mechanical properties of equiatomic solid solution alloys with face-centered                                                                                                                                                                                      |

|                               |             |             |                    |                                                                                                                                                                                                                                           |
|-------------------------------|-------------|-------------|--------------------|-------------------------------------------------------------------------------------------------------------------------------------------------------------------------------------------------------------------------------------------|
| <b>CoCrMnNi</b>               | <b>282</b>  | <b>260</b>  | <b>7.80141844</b>  | <b>cubic crystal structures. Acta Mater. 81, 428-441.</b>                                                                                                                                                                                 |
| <b>FeMnNi</b>                 | <b>221</b>  | <b>210</b>  | <b>4.977375566</b> |                                                                                                                                                                                                                                           |
| <b>Hf0.5Nb0.5Ta0.5Ti1.5Zr</b> | <b>903</b>  | <b>979</b>  | <b>8.416389812</b> | <b>Sheikh, S., Shafeie, S., Hu, Q., Ahlstrom, J., Persson, C., Vesely, J., Zyka, J., Klement, U., Guo, S., 2016. Alloy design for intrinsically ductile refractory high-entropy alloys. J. Appl. Phys. 120, 164902.</b>                   |
| <b>HfMo0.25NbTaTiZr</b>       | <b>1112</b> | <b>1192</b> | <b>7.194244604</b> | <b>Juan, C.-C., Tseng, K.-K., Hsu, W.-L., Tsai, M.-H., Tsai, C.-W., Lin, C.-M., Chen, S.-K., Lin, S.-J., Yeh, J.-W., 2016. Solution strengthening of ductile refractory HfMoxNbTaTiZr high-entropy alloys. Mater. Lett. 175, 284-287.</b> |
| <b>HfMo0.5NbTaTiZr</b>        | <b>1317</b> | <b>1327</b> | <b>0.759301443</b> |                                                                                                                                                                                                                                           |
| <b>HfMo0.75NbTaTiZr</b>       | <b>1373</b> | <b>1412</b> | <b>2.840495266</b> |                                                                                                                                                                                                                                           |
| <b>HfMoNbTaTiZr</b>           | <b>1512</b> | <b>1491</b> | <b>1.388888889</b> |                                                                                                                                                                                                                                           |
| <b>HfNbTaTiZr</b>             | <b>1015</b> | <b>1026</b> | <b>1.083743842</b> |                                                                                                                                                                                                                                           |
| <b>HfMoNbZrTi</b>             | <b>1803</b> | <b>2030</b> | <b>12.59012757</b> | <b>Guo, N.N., Wang, L., Luo, L.S., Li, X.Z., Su, Y.Q., Guo, J.J., Fu, H.Z., 2015. Microstructure and mechanical properties of refractory MoNbHfZrTi high-entropy alloy. Mater. Des. 81, 87-94.</b>                                        |
| <b>Mo0.5NbTiVZr</b>           | <b>1473</b> | <b>1725</b> | <b>17.10794297</b> | <b>Y.D. Wu, Y.H. Cai, X.H. Chen, T. Wang, J.J. Si, L. Wang, Y.D. Wang, X.D. Hui, Phase composition and solid</b>                                                                                                                          |

|                      |             |             |                    |                                                                                                                                                                                                                 |
|----------------------|-------------|-------------|--------------------|-----------------------------------------------------------------------------------------------------------------------------------------------------------------------------------------------------------------|
| <b>Mo0.7NbTiVZr</b>  | <b>1706</b> | <b>1730</b> | <b>1.406799531</b> | <b>solution strengthening effect in TiZrNbMoV high-entropy alloys, Mater. Des. 83 (2015) 651–660.</b>                                                                                                           |
| <b>Mo1.3NbTiVZr</b>  | <b>1496</b> | <b>1760</b> | <b>17.64705882</b> |                                                                                                                                                                                                                 |
| <b>Mo1.5NbTiVZr</b>  | <b>1603</b> | <b>1768</b> | <b>10.29320025</b> |                                                                                                                                                                                                                 |
| <b>Mo1.7NbTiVZr</b>  | <b>1645</b> | <b>1773</b> | <b>7.781155015</b> |                                                                                                                                                                                                                 |
| <b>Mo2NbTiVZr</b>    | <b>1765</b> | <b>1780</b> | <b>0.849858357</b> |                                                                                                                                                                                                                 |
| <b>MoNbTaV</b>       | <b>1525</b> | <b>1546</b> | <b>1.37704918</b>  |                                                                                                                                                                                                                 |
| <b>MoNbTaW</b>       | <b>1058</b> | <b>1115</b> | <b>5.387523629</b> |                                                                                                                                                                                                                 |
| <b>MoNbTiV0.25Zr</b> | <b>1776</b> | <b>2014</b> | <b>13.4009009</b>  | <b>Y.D. Wu, Y.H. Cai, X.H. Chen, T. Wang, J.J. Si, L. Wang, Y.D. Wang, X.D. Hui, Phase composition and solid solution strengthening effect in TiZrNbMoV high-entropy alloys, Mater. Des. 83 (2015) 651–660.</b> |
| <b>MoNbTiV0.50Zr</b> | <b>1647</b> | <b>1880</b> | <b>14.14693382</b> |                                                                                                                                                                                                                 |
| <b>MoNbTiV0.75Zr</b> | <b>1708</b> | <b>1859</b> | <b>8.840749415</b> |                                                                                                                                                                                                                 |
| <b>MoNbTiV1.0Zr</b>  | <b>1786</b> | <b>1746</b> | <b>2.239641657</b> |                                                                                                                                                                                                                 |

|                     |             |             |                    |                                                                                                                                                                                                                  |
|---------------------|-------------|-------------|--------------------|------------------------------------------------------------------------------------------------------------------------------------------------------------------------------------------------------------------|
| <b>MoNbTiV1.5Zr</b> | <b>1735</b> | <b>1550</b> | <b>10.66282421</b> |                                                                                                                                                                                                                  |
| <b>MoNbTiV2.0Zr</b> | <b>1538</b> | <b>1466</b> | <b>4.681404421</b> |                                                                                                                                                                                                                  |
| <b>MoNbTiV3.0Zr</b> | <b>1418</b> | <b>1347</b> | <b>5.007052186</b> |                                                                                                                                                                                                                  |
| <b>NbTiVZr</b>      | <b>1104</b> | <b>1231</b> | <b>11.50362319</b> |                                                                                                                                                                                                                  |
| <b>MoNbTiVZr</b>    | <b>1779</b> | <b>1618</b> | <b>9.050028106</b> |                                                                                                                                                                                                                  |
| <b>MoNbTiZr</b>     | <b>1595</b> | <b>1826</b> | <b>14.48275862</b> | <b>Zhang, Y., Yang, X., Liaw, P.K., 2012. Alloy design and properties optimization of high entropy alloys. JOM 64, 830-838.</b>                                                                                  |
| <b>NbTaTiV</b>      | <b>1092</b> | <b>821</b>  | <b>24.81684982</b> | <b>Yang, X., Zhang, Y., Liaw, P.K., 2012. Microstructure and compressive properties of NbTiVTaAlx high entropy alloys. Procedia Eng. 36, 292-298.</b>                                                            |
| <b>NbTaVW</b>       | <b>1530</b> | <b>1719</b> | <b>12.35294118</b> | <b>Yao, H.W., Qiao, J.W., Gao, M.C., Hawk, J.A., Ma, S.G., Zhou, H.F., Zhang, Y., 2016b. NbTaV-(Ti,W) refractory high-entropy alloys: experiments and modeling. Mater. Sci. Eng. A 674, 203-211.</b>             |
| <b>NbTiV2Zr</b>     | <b>918</b>  | <b>922</b>  | <b>0.435729847</b> | <b>Senkov, O.N., Senkova, V., Miracle, D.B., Woodward, C., 2013. Mechanical properties of low-density, refractory multi-principal element alloys of the Cr-Nb-Ti-V-Zr system. Mater. Sci. Eng. A 565, 51-62.</b> |

**Data S5** The “composition-phase fraction” data set in Al-Fe-Co-Cr-Ni-Mn system is established using data augment strategy.

| Al(at.%) | Fe(at.%) | Co(at.%) | Cr(at.%) | Ni(at.%) | Mn(at.%) | BCC(%) | FCC(%) |
|----------|----------|----------|----------|----------|----------|--------|--------|
| 8        | 18.4     | 18.4     | 18.4     | 18.4     | 18.4     | 5.77   | 94.23  |
| 8.26     | 18.348   | 18.348   | 18.348   | 18.348   | 18.348   | 7.03   | 92.97  |
| 8.47     | 18.306   | 18.306   | 18.306   | 18.306   | 18.306   | 8.3    | 91.7   |
| 8.68     | 18.264   | 18.264   | 18.264   | 18.264   | 18.264   | 9.38   | 90.62  |
| 9        | 18.2     | 18.2     | 18.2     | 18.2     | 18.2     | 11.38  | 88.62  |
| 9.24     | 18.152   | 18.152   | 18.152   | 18.152   | 18.152   | 13.36  | 86.64  |
| 9.46     | 18.108   | 18.108   | 18.108   | 18.108   | 18.108   | 15.34  | 84.66  |
| 9.65     | 18.07    | 18.07    | 18.07    | 18.07    | 18.07    | 16.97  | 83.03  |
| 9.83     | 18.034   | 18.034   | 18.034   | 18.034   | 18.034   | 18.59  | 81.41  |
| 10       | 18       | 18       | 18       | 18       | 18       | 20.22  | 79.78  |
| 10.29    | 17.942   | 17.942   | 17.942   | 17.942   | 17.942   | 21.48  | 78.52  |
| 10.49    | 17.902   | 17.902   | 17.902   | 17.902   | 17.902   | 22.57  | 77.43  |
| 10.67    | 17.866   | 17.866   | 17.866   | 17.866   | 17.866   | 23.65  | 76.35  |
| 10.82    | 17.836   | 17.836   | 17.836   | 17.836   | 17.836   | 24.38  | 75.62  |
| 11       | 17.8     | 17.8     | 17.8     | 17.8     | 17.8     | 25.64  | 74.36  |
| 11.17    | 17.766   | 17.766   | 17.766   | 17.766   | 17.766   | 28.7   | 71.3   |
| 11.31    | 17.738   | 17.738   | 17.738   | 17.738   | 17.738   | 31.59  | 68.41  |
| 11.43    | 17.714   | 17.714   | 17.714   | 17.714   | 17.714   | 34.11  | 65.89  |
| 11.54    | 17.692   | 17.692   | 17.692   | 17.692   | 17.692   | 36.45  | 63.55  |
| 11.69    | 17.662   | 17.662   | 17.662   | 17.662   | 17.662   | 39.51  | 60.49  |
| 11.83    | 17.634   | 17.634   | 17.634   | 17.634   | 17.634   | 42.04  | 57.96  |
| 12       | 17.6     | 17.6     | 17.6     | 17.6     | 17.6     | 45.64  | 54.36  |
| 12.15    | 17.57    | 17.57    | 17.57    | 17.57    | 17.57    | 51.22  | 48.78  |
| 12.31    | 17.538   | 17.538   | 17.538   | 17.538   | 17.538   | 57.16  | 42.84  |
| 12.45    | 17.51    | 17.51    | 17.51    | 17.51    | 17.51    | 62.38  | 37.62  |
| 12.6     | 17.48    | 17.48    | 17.48    | 17.48    | 17.48    | 67.78  | 32.22  |
| 12.76    | 17.448   | 17.448   | 17.448   | 17.448   | 17.448   | 73.9   | 26.1   |
| 12.86    | 17.428   | 17.428   | 17.428   | 17.428   | 17.428   | 77.68  | 22.32  |
| 13       | 17.4     | 17.4     | 17.4     | 17.4     | 17.4     | 82.72  | 17.28  |
| 13.23    | 17.354   | 17.354   | 17.354   | 17.354   | 17.354   | 85.78  | 14.22  |
| 13.42    | 17.316   | 17.316   | 17.316   | 17.316   | 17.316   | 88.85  | 11.15  |
| 13.59    | 17.282   | 17.282   | 17.282   | 17.282   | 17.282   | 91     | 9      |
| 13.75    | 17.25    | 17.25    | 17.25    | 17.25    | 17.25    | 93.53  | 6.47   |
| 13.88    | 17.224   | 17.224   | 17.224   | 17.224   | 17.224   | 95.52  | 4.48   |
| 14       | 17.2     | 17.2     | 17.2     | 17.2     | 17.2     | 96.96  | 3.04   |

**Data S6** The data set includes 64 entries collected from the experiments in the previous researches, including alloy compositions, elongation and references.

| Alloys               | Elongation (%) | References                                                                                                                                                                                                                                                     |
|----------------------|----------------|----------------------------------------------------------------------------------------------------------------------------------------------------------------------------------------------------------------------------------------------------------------|
| FeCrCuMnNi           | 14             | Shabani, A., Toroghinejad, M. R., Shafyei, A., & Logé, R. E. (2019). Microstructure and mechanical properties of a multiphase FeCrCuMnNi high-entropy alloy. <i>Journal of Materials Engineering and Performance</i> , 28(4), 2388-2398.                       |
| CoCrFeNi             | 63             | Liu, J., Guo, X., Lin, Q., He, Z., An, X., Li, L., ... & Zhang, Y. (2019). Excellent ductility and serration feature of metastable CoCrFeNi high-entropy alloy at extremely low temperatures. <i>Science China Materials</i> , 62(6), 853-863.                 |
| Al0.20CoCrFeMnNi     | 56             | He, J. Y., Liu, W. H., Wang, H., Wu, Y., Liu, X. J., Nieh, T. G., & Lu, Z. P. (2014). Effects of Al addition on structural evolution and tensile properties of the FeCoNiCrMn high-entropy alloy system. <i>Acta Materialia</i> , 62, 105-113.                 |
| Al0.38CoCrFeMnNi     | 45             |                                                                                                                                                                                                                                                                |
| Al0.43CoCrFeMnNi     | 35             |                                                                                                                                                                                                                                                                |
| Al0.49CoCrFeMnNi     | 29             |                                                                                                                                                                                                                                                                |
| Al0.56CoCrFeMnNi     | 16             |                                                                                                                                                                                                                                                                |
| Al0.62CoCrFeMnNi     | 5              |                                                                                                                                                                                                                                                                |
| CoCrMnNi             | 44             | Wu, Z., Bei, H., Pharr, G. M., & George, E. P. (2014). Temperature dependence of the mechanical properties of equiatomic solid solution alloys with face-centered cubic crystal structures. <i>Acta Materialia</i> , 81, 428-441.                              |
| CoCrNi               | 60             |                                                                                                                                                                                                                                                                |
| CoFeMnNi             | 41             |                                                                                                                                                                                                                                                                |
| CoFeNi               | 31             |                                                                                                                                                                                                                                                                |
| Al0.16CoCrFeNiTi0.08 | 70             | He, J. Y., Wang, H., Huang, H. L., Xu, X. D., Chen, M. W., Wu, Y., ... & Lu, Z. P. (2016). A precipitation-hardened high-entropy alloy with outstanding tensile properties. <i>Acta Materialia</i> , 102, 187-196.                                             |
| AlCrCoFeNi2.1        | 16.5           | Lu, Y., Gao, X., Jiang, L., Chen, Z., Wang, T., Jie, J., ... & Li, T. (2017). Directly cast bulk eutectic and near-eutectic high entropy alloys with balanced strength and ductility in a wide temperature range. <i>Acta materialia</i> , 124, 143-150.       |
| AlCrCoFeNi2.2        | 20             |                                                                                                                                                                                                                                                                |
| AlCrCoFeNi2          | 16.5           |                                                                                                                                                                                                                                                                |
| FeCoNiCrTi0.2        | 36             | Tong, Y., Chen, D., Han, B., Wang, J., Feng, R., Yang, T., ... & Kai, J. J. (2019). Outstanding tensile properties of a precipitation-strengthened FeCoNiCrTi0.2 high-entropy alloy at room and cryogenic temperatures. <i>Acta Materialia</i> , 165, 228-240. |
| Al0.1CoCrFeNi        | 30.3           | Wu, S. W., Wang, G., Wang, Q., Jia, Y. D., Yi, J., Zhai, Q. J., ... & Zhang, T. Y. (2019). Enhancement of strength-ductility trade-off in a high-entropy alloy through a heterogeneous structure. <i>Acta Materialia</i> , 165, 444-458.                       |

|                                                              |      |                                                                                                                                                                                                                                                                                                 |
|--------------------------------------------------------------|------|-------------------------------------------------------------------------------------------------------------------------------------------------------------------------------------------------------------------------------------------------------------------------------------------------|
| Co <sub>0.5</sub> CrNi                                       | 64   | Yoshida, S., Ikeuchi, T., Bhattacharjee, T., Bai, Y., Shibata, A., & Tsuji, N. (2019). Effect of elemental combination on friction stress and Hall-Petch relationship in face-centered cubic high/medium entropy alloys. <i>Acta Materialia</i> , 171, 201-215.                                 |
| CoNiCr <sub>0.5</sub>                                        | 36   |                                                                                                                                                                                                                                                                                                 |
| CoMnNi                                                       | 40   |                                                                                                                                                                                                                                                                                                 |
| FeMnNi                                                       | 49   |                                                                                                                                                                                                                                                                                                 |
| Cr <sub>0.59</sub> Fe <sub>0.18</sub> CoNiMo <sub>0.18</sub> | 32   | Ming, K., Bi, X., & Wang, J. (2019). Strength and ductility of CrFeCoNiMo alloy with hierarchical microstructures. <i>International Journal of Plasticity</i> , 113, 255-268.                                                                                                                   |
| Al <sub>0.5</sub> CoCrCuFeNi                                 | 5    | Tsai, C. W., Tsai, M. H., Yeh, J. W., & Yang, C. C. (2010). Effect of temperature on mechanical properties of Al <sub>0.5</sub> CoCrCuFeNi wrought alloy. <i>Journal of Alloys and Compounds</i> , 490(1-2), 160-165.                                                                           |
| CrFeNi <sub>2.1</sub> Al <sub>0.9</sub>                      | 9.1  | Jin, X., Bi, J., Zhang, L., Zhou, Y., Du, X., Liang, Y., & Li, B. (2019). A new CrFeNi <sub>2</sub> Al eutectic high entropy alloy system with excellent mechanical properties. <i>Journal of Alloys and Compounds</i> , 770, 655-661.                                                          |
| CrFeNi <sub>2.2</sub> Al <sub>0.8</sub>                      | 12.7 |                                                                                                                                                                                                                                                                                                 |
| CrFeNi <sub>2.3</sub> Al <sub>0.7</sub>                      | 30   |                                                                                                                                                                                                                                                                                                 |
| CrFeNi <sub>2.4</sub> Al <sub>0.6</sub>                      | 45   |                                                                                                                                                                                                                                                                                                 |
| CrFeNi <sub>2</sub> Al                                       | 6.4  |                                                                                                                                                                                                                                                                                                 |
| HfNbTaTiZr                                                   | 15.7 | Chen, S., Tseng, K. K., Tong, Y., Li, W., Tsai, C. W., Yeh, J. W., & Liaw, P. K. (2019). Grain growth and Hall-Petch relationship in a refractory HfNbTaZrTi high-entropy alloy. <i>Journal of Alloys and Compounds</i> , 795, 19-26.                                                           |
| Al <sub>0.3</sub> Cu <sub>0.5</sub> FeCrNi <sub>2</sub>      | 98   | Zhang, K., Wen, H., Zhao, B., Dong, X., & Zhang, L. (2019). Precipitation behavior and its impact on mechanical properties in an aged carbon-containing Al <sub>0.3</sub> Cu <sub>0.5</sub> CrFeNi <sub>2</sub> high-entropy alloy. <i>Materials Characterization</i> , 155, 109792.            |
| CoCuFeMnNi                                                   | 14   | Liu, L., Zhu, J. B., Li, L., Li, J. C., & Jiang, Q. (2013). Microstructure and tensile properties of FeMnNiCuCoSn <sub>x</sub> high entropy alloys. <i>Materials &amp; Design</i> , 44, 223-227.                                                                                                |
| CoCuFeMnNiSn <sub>0.03</sub>                                 | 18   |                                                                                                                                                                                                                                                                                                 |
| HfNbTiZr                                                     | 14.9 | Wu, Y. D., Cai, Y. H., Wang, T., Si, J. J., Zhu, J., Wang, Y. D., & Hui, X. D. (2014). A refractory Hf <sub>25</sub> Nb <sub>25</sub> Ti <sub>25</sub> Zr <sub>25</sub> high-entropy alloy with excellent structural stability and tensile properties. <i>Materials Letters</i> , 130, 277-280. |
| Al <sub>0.5</sub> Cr <sub>0.5</sub> FeNi                     | 15.7 | Dong, Y., Gao, X., Lu, Y., Wang, T., & Li, T. (2016). A multi-component AlCrFe <sub>2</sub> Ni <sub>2</sub> alloy with excellent mechanical properties. <i>Materials Letters</i> , 169, 62-64.                                                                                                  |
| Al <sub>0.3</sub> CoCrFeNi                                   | 48   | Yasuda, H. Y., Miyamoto, H., Cho, K., & Nagase, T. (2017). Formation of ultrafine-grained microstructure in Al <sub>0.3</sub> CoCrFeNi high entropy alloys with grain boundary precipitates. <i>Materials Letters</i> , 199, 120-123.                                                           |
| CoCuFeNi                                                     | 15   | Liu, L., Zhu, J. B., Zhang, C., Li, J. C., &                                                                                                                                                                                                                                                    |

|                                                                                                               |      |                                                                                                                                                                                                                                                                                                                                                         |
|---------------------------------------------------------------------------------------------------------------|------|---------------------------------------------------------------------------------------------------------------------------------------------------------------------------------------------------------------------------------------------------------------------------------------------------------------------------------------------------------|
| CoCuFeNiSn0.02                                                                                                | 17   | Jiang, Q. (2012). Microstructure and the properties of FeCoCuNiSn <sub>x</sub> high entropy alloys. <i>Materials Science and Engineering: A</i> , 548, 64-68.                                                                                                                                                                                           |
| AlCoCrFeNi                                                                                                    | 1    | Tang, Z., Senkov, O. N., Parish, C. M., Zhang, C., Zhang, F., Santodonato, L. J., ... & Liaw, P. K. (2015). Tensile ductility of an AlCoCrFeNi multi-phase high-entropy alloy through hot isostatic pressing (HIP) and homogenization. <i>Materials Science and Engineering: A</i> , 647, 229-240.                                                      |
| Al <sub>0.11</sub> Co <sub>0.51</sub> Cr <sub>0.51</sub> Cu <sub>0.11</sub> Fe <sub>0.51</sub> Ni             | 30   | Wang, Z. G., Zhou, W., Fu, L. M., Wang, J. F., Luo, R. C., Han, X. C., ... & Wang, X. D. (2017). Effect of coherent L12 nanoprecipitates on the tensile behavior of a fcc-based high-entropy alloy. <i>Materials Science and Engineering: A</i> , 696, 503-510.                                                                                         |
| V <sub>0.29</sub> Cr <sub>0.43</sub> Mn <sub>0.14</sub> Fe <sub>1</sub> Co <sub>0.29</sub> Ni <sub>0.71</sub> | 49   | Asghari-Rad, P., Sathiyamoorthi, P., Bae, J. W., Moon, J., Park, J. M., Zargaran, A., & Kim, H. S. (2019). Effect of grain size on the tensile behavior of V <sub>10</sub> Cr <sub>15</sub> Mn <sub>5</sub> Fe <sub>35</sub> Co <sub>10</sub> Ni <sub>25</sub> high entropy alloy. <i>Materials Science and Engineering: A</i> , 744, 610-617.          |
| FeCoCrNiMn                                                                                                    | 54   | Guo, L., Ou, X., Ni, S., Liu, Y., & Song, M. (2019). Effects of carbon on the microstructures and mechanical properties of FeCoCrNiMn high entropy alloys. <i>Materials Science and Engineering: A</i> , 746, 356-362.                                                                                                                                  |
| Co <sub>0.99</sub> Cr <sub>0.95</sub> Fe <sub>0.93</sub> NiMn <sub>0.91</sub>                                 | 46.2 | Klimova, M. V., Shaysultanov, D. G., Zherebtsov, S. V., & Stepanov, N. D. (2019). Effect of second phase particles on mechanical properties and grain growth in a CoCrFeMnNi high entropy alloy. <i>Materials Science and Engineering: A</i> , 748, 228-235.                                                                                            |
| Al <sub>0.29</sub> Cr <sub>0.34</sub> FeMn <sub>0.65</sub> Ni <sub>0.57</sub>                                 | 42.2 | Elkatatny, S., Gepreel, M. A., Hamada, A., Nakamura, K., Yamanaka, K., & Chiba, A. (2019). Effect of Al content and cold rolling on the microstructure and mechanical properties of Al <sub>5</sub> Cr <sub>12</sub> Fe <sub>35</sub> Mn <sub>28</sub> Ni <sub>20</sub> high-entropy alloy. <i>Materials Science and Engineering: A</i> , 759, 380-390. |
| Al <sub>0.14</sub> Cr <sub>0.34</sub> FeMn <sub>0.8</sub> Ni <sub>0.57</sub>                                  | 48   |                                                                                                                                                                                                                                                                                                                                                         |
| CoCrFeNiMo <sub>0.15</sub>                                                                                    | 53.6 | Wu, W., Guo, L., Guo, B., Liu, Y., & Song, M. (2019). Altered microstructural evolution and mechanical properties of CoCrFeNiMo <sub>0.15</sub> high-entropy alloy by cryogenic rolling. <i>Materials Science and Engineering: A</i> , 759, 574-582.                                                                                                    |
| FeMnCo <sub>0.25</sub> Cr <sub>0.25</sub>                                                                     | 55.7 | Tang, K., Chen, L. B., Wang, S., Wei, R., Yang, Z. Y., Jiang, F., & Sun, J. (2019). Development of a large size FCC high-entropy alloy with excellent mechanical properties. <i>Materials Science and</i>                                                                                                                                               |



|                                                                           |              |                                                                                                                                                                                                                                                                                      |
|---------------------------------------------------------------------------|--------------|--------------------------------------------------------------------------------------------------------------------------------------------------------------------------------------------------------------------------------------------------------------------------------------|
|                                                                           |              | <b>Engineering: A, 761, 138039.</b>                                                                                                                                                                                                                                                  |
| <b>Co<sub>0.5</sub>CrFeNi<sub>1.5</sub>Ti<sub>0.3</sub></b>               | <b>46</b>    | <b>Shun, T. T., &amp; Chang, C. H. (2019). The effects of substitution of Co with Ni on microstructure, mechanical properties, and age hardening of Co<sub>1-x</sub>CrFeNi<sub>1+x</sub>Ti<sub>0.3</sub> high-entropy alloys. Materials Science and Engineering: A, 763, 138181.</b> |
| <b>CoCrFeNiTi<sub>0.3</sub></b>                                           | <b>60</b>    |                                                                                                                                                                                                                                                                                      |
| <b>CrFeNi<sub>2</sub>Ti<sub>0.3</sub></b>                                 | <b>37</b>    |                                                                                                                                                                                                                                                                                      |
| <b>Al<sub>0.7</sub>CoCrFe<sub>2</sub>Ni</b>                               | <b>7.9</b>   | <b>Wang, Q., Ma, Y., Jiang, B., Li, X., Shi, Y., Dong, C., &amp; Liaw, P. K. (2016). A cuboidal B2 nanoprecipitation-enhanced body-centered-cubic alloy Al<sub>0.7</sub>CoCrFe<sub>2</sub>Ni with prominent tensile properties. Scripta Materialia, 120, 85-89.</b>                  |
| <b>Co<sub>1.75</sub>Cr<sub>0.75</sub>FeNiMo<sub>0.5</sub></b>             | <b>21.9</b>  | <b>Ming, K., Bi, X., &amp; Wang, J. (2017). Precipitation strengthening of ductile Cr<sub>15</sub>Fe<sub>20</sub>Co<sub>35</sub>Ni<sub>20</sub>Mo<sub>10</sub> alloys. Scripta Materialia, 137, 88-93.</b>                                                                           |
| <b>Al<sub>0.3</sub>CoCrFeNi</b>                                           | <b>65</b>    | <b>Gwalani, B., Gorse, S., Choudhuri, D., Zheng, Y., Mishra, R. S., &amp; Banerjee, R. (2019). Tensile yield strength of a single bulk Al<sub>0.3</sub>CoCrFeNi high entropy alloy can be tuned from 160 MPa to 1800 MPa. Scripta Materialia, 162, 18-23.</b>                        |
| <b>CoFeNi<sub>2</sub>V<sub>0.5</sub>Mo<sub>0.2</sub></b>                  | <b>119.5</b> | <b>Jiang, L., Lu, Y. P., Song, M., Lu, C., Sun, K., Cao, Z. Q., ... &amp; Wang, L. M. (2019). A promising CoFeNi<sub>2</sub>V<sub>0.5</sub>Mo<sub>0.2</sub> high entropy alloy with exceptional ductility. Scripta Materialia, 165, 128-133.</b>                                     |
| <b>AlCoCrFeNi<sub>2.1</sub></b>                                           | <b>21.4</b>  | <b>Shi, P., Ren, W., Zheng, T., Ren, Z., Hou, X., Peng, J., ... &amp; Liaw, P. K. (2019). Enhanced strength–ductility synergy in ultrafine-grained eutectic high-entropy alloys by inheriting microstructural lamellae. Nature communications, 10(1), 1-8.</b>                       |
| <b>Hf<sub>0.5</sub>Nb<sub>0.5</sub>Ta<sub>0.5</sub>Ti<sub>1.5</sub>Zr</b> | <b>19</b>    | <b>Sheikh, S., Shafeie, S., Hu, Q., Ahlström, J., Persson, C., Veselý, J., ... &amp; Guo, S. (2016). Alloy design for intrinsically ductile refractory high-entropy alloys. Journal of applied physics, 120(16), 164902.</b>                                                         |
| <b>Co<sub>0.2</sub>Cr<sub>0.2</sub>FeMn<sub>0.6</sub></b>                 | <b>75</b>    | <b>Li, Z., Tasan, C. C., Pradeep, K. G., &amp; Raabe, D. (2017). A TRIP-assisted dual-phase high-entropy alloy: grain size and phase fraction effects on deformation behavior. Acta Materialia, 131, 323-335.</b>                                                                    |
| <b>Co<sub>1.75</sub>Cr<sub>1.25</sub>FeNi</b>                             | <b>96.2</b>  | <b>Wei, D., Li, X., Heng, W., Koizumi, Y., He, F., Choi, W. M., ... &amp; Chiba, A. (2019). Novel Co-rich high entropy alloys with superior tensile properties. Materials Research Letters, 7(2), 82-88.</b>                                                                         |
| <b>Co<sub>3</sub>Cr<sub>1.67</sub>FeNi</b>                                | <b>76.1</b>  |                                                                                                                                                                                                                                                                                      |
| <b>NbTaTi</b>                                                             | <b>18.5</b>  | <b>Zýka, J., Málek, J., Veselý, J., Lukáč, F., Čížek, J., Kuriplach, J., &amp; Melikhova, O. (2019). Microstructure and room temperature mechanical properties of</b>                                                                                                                |
| <b>NbTaTiZr</b>                                                           | <b>6.4</b>   |                                                                                                                                                                                                                                                                                      |
|                                                                           |              |                                                                                                                                                                                                                                                                                      |

|                                                                                                     |           |                                                                                                                                                                                                                                                                                                                       |
|-----------------------------------------------------------------------------------------------------|-----------|-----------------------------------------------------------------------------------------------------------------------------------------------------------------------------------------------------------------------------------------------------------------------------------------------------------------------|
|                                                                                                     |           | <b>different 3 and 4 element medium entropy alloys from HfNbTaTiZr system. Entropy, 21(2), 114.</b>                                                                                                                                                                                                                   |
| <b>Al<sub>0.28</sub>Co<sub>0.69</sub>Cr<sub>0.22</sub>Fe<sub>0.42</sub><br/>NiTi<sub>0.17</sub></b> | <b>27</b> | <b>Haas, S., Manzoni, A. M., Krieg, F., &amp; Glatzel, U. (2019). Microstructure and mechanical properties of precipitate strengthened high entropy alloy Al<sub>10</sub>Co<sub>25</sub>Cr<sub>8</sub>Fe<sub>15</sub>Ni<sub>36</sub>Ti<sub>6</sub> with additions of hafnium and molybdenum. Entropy, 21(2), 169.</b> |
| <b>CoCrFeNiMo<sub>0.2</sub></b>                                                                     | <b>53</b> | <b>Zhang, C., Liu, B., Liu, Y., Fang, Q., Guo, W., &amp; Yang, H. (2019). Effects of Annealing on Microstructure and Mechanical Properties of Metastable Powder Metallurgy CoCrFeNiMo<sub>0.2</sub> High Entropy Alloy. Entropy, 21(5), 448.</b>                                                                      |

## References

- [1] W. Huang, P. Martin, and H. L. Zhuang, *Acta Mater.*, 2019, **169**, 225-236.
- [2] N. Islam, W. Huang, and H. L. Zhuang, *Comput. Mater. Sci.*, 2018, **150**, 230-235.
- [3] Li, J, B. Xie, Q. Fang, B. Liu, Y. Liu, and P. K. Liaw, *J. Mater. Sci. Technol.*, 2021, **68**, 70-75.
- [4] C. Varvenne, G. P. M. Leyson, M. Ghazisaeidi, and W. A. Curtin, *Acta Mater.*, 2017, **124**, 660-683.
- [5] F. Maresca, and W. A. Curtin, *Acta Mater.*, 2020, **182**, 144-162.
- [6] T. Sathish, S. Rangarajan, A. Muthuram, and R. P. Kumar, *Mater. Today: Proc.*, 2020, **21**, 108-112.
- [7] X. Geng, H. Wang, W. Xue, S. Xiang, H. Huang, L. Meng, and G. Ma, *Comput. Mater. Sci.*, 2020, **171**, 109235.
- [8] J. M. Barrios, and P. E. Romero, *Materials*, 2019, **12**, 2574.
- [9] R. F. Martinez, A. Okariz, J. Ibarretxe, M. Iturrondobeitia and T. Guraya, *Comput. Mater. Sci.*, 2014, **92**, 102-113.
- [10] J. Y. He, W. H. Liu, H. Wang, Y. Wu, X. J. Liu, T.G.Nieh and Z.P. Lu, *Acta Mater.*, 2014, **62**, 105-113.
- [11] Z. Pei, J. Yin, J. A. Hawk, D. E. Alman and M.C. Gao, *npj Comput. Mater.*, 2020, **6**, 1-8.
- [12] C. Wang, H.Fu, L. Jiang, D. Xue and J. Xie, *npj Comput. Mater.*, 2019, **5**, 1-8.
- [13] Y. Zhang, Y. J. Zhou, J. P. Lin, G. L. Chen and P. K. Liaw, *Adv. Eng. Mater.*, 2008, **10**, 534-538.
- [14] X. Yang, and Y. Zhang, *Mater. Chem. Phys.*, 2012, **132**, 233-238.
- [15] S. Guo, C.Ng, J. Lu, and C.T. Liu, *J. Appl. Phys.*, 2011, **109**, 103505.
- [16] Z.Wang, Y. Huang, Y. Yang, J. Wang and C.T. Liu, *Scr. Mater.*, 2015, **94**, 28-31.
- [17] A. K. Singh, N. Kumar, A. Dwivedi and A.Subramaniam, *Intermetallics*, 2014, **53**, 112-119.
- [18] L. A. Gypen and A. Deruyttere, *J. Mater. Sci.*, 1977, **12**, 1028-1033.
- [19] O. N.Senkov, J. M. Scott, S. V. Senkova, D. B. Miracle, C. F. Woodward, *J. Alloys Compd.*, 2011, **509**, 6043-6048.

- [20] I. Toda-Caraballo and P. E. J. Rivera-Díaz-del-Castillo, *Acta Mater.*, 2015, **85**, 14-23.
- [21] O. N. Senkov, J. M. Scott, S. V. Senkova, F. Meisenkothen, D. B. Miracle and C. F. Woodward, *J. Mater. Sci.*, 2012, **47**, 4062-4074.
- [22] Q. Wang, Y. Ma, B. Jiang, X. Li, Y. Shi, C. Dong and P. K. Liaw, *Scr. Mater.*, 2016, **120**, 85-89.
- [23] Y. Lu, X. Gao, L. Jiang, Z. Chen, T. Wang, J. Jie, H. Kang, Y. Zhang, S. Guo and H. Ruan, *Acta Mater.*, 2017, **124**, 143-150.
- [24] D. Wei, X. Li, W. Heng, Y. Koizumi, F. He, W. M. Choi, B. J. Lee, H. S. Kim, H. Kato and A. Chiba, *Mater. Res. Lett.*, 2019, **7**, 82-88.
- [25] X. Jin, J. Bi, L. Zhang, Y. Zhou, X. Du, Y. Liang and B. Li, *J. Alloys Compd.*, 2019, **770**, 655-661.
- [26] S. Elkatatny, M. A. H. Gepreel, A. Hamada, K. Nakamura, K. Yamanaka and A. Chiba, *Mater. Sci. Eng. A*, 2019, **759**, 380-390.
- [27] A. Shabani, M. R. Toroghinejad, A. Shafyei and R.E. Logé, *Mater. Chem. Phys.*, 2019, **221**, 68-77.
- [28] U. Sunkari, S. R. Reddy, S. Chatterjee and P. P. Bhattacharjee, *Mater. Lett.*, 2019, **248**, 119-122.
- [29] L. Liu, J. B. Zhu, L. Li, J. C. Li and Q. Jiang, *Mater. Des.*, 2013, **44**, 223-227.
- [30] L. Liu, J. B. Zhu, C. Zhang, J. C. Li and Q. Jiang, *Mater. Sci. Eng. A*, 2012, **548**, 64-68.
- [31] J. Zýka, J. Málek, J. Veselý, F. Lukáč, J. Čížek, J. Kuriplach and O. Melikhova, *Entropy*, 2019, **21**, 114.
- [32] C. Wen, Y. Zhang, C. Wang, D. Xue, Y. Bai, S. Antonov, L. Dai, T. Lookman and Y. Su, *Acta Mater.*, 2019, **170**, 109-117.
- [33] R. Feng, M. C. Gao, C. Zhang, W. Guo, J. D. Poplawsky, F. Zhang, J. A. Hawk, J. C. Neufeind, Y. Ren and P. K. Liaw, *Acta Mater.*, 2018, **146**, 280-293.
- [34] B. D. Conduit, N. G. Jones, H. J. Stone and G. J. Conduit, *Mater. Des.*, 2017, **131**, 358-365.
- [35] C. H. Caceres, *Metall. Mater. Trans. A*, 2007, **38**, 1649-1662.
- [36] P. Peng, X. He, J. She, A. Tang, M. Rashad, S. Zhou, G. Zhang, X. Mi and F. Pan, *Mater. Sci. Eng. A*, 2019, **766**, 138332.
- [37] A. T. Abbas, M. Abubakr, M. A. Hassan, M. Luqman, M. S. Soliman and H. Hegab, *J. Mater. Res. Technol.*, 2020, **9**, 14568-14581.

[38] D. Qiao, Y. Lu, Z. Tang, X. Fan, T. Wang T. Li, and P K. Liaw, *Int. J. Hydrogen Energy*, 2019, **44**, 3527-3537.
